# Supplementary material for: T-Box Transcription Factor 22 Is an Immune Microenvironment-Related Biomarker Associated With the BRAFV600E Mutation in Papillary Thyroid Carcinoma
Source: Front Cell Dev Biol. 2020 Dec 17;8:590898. doi: 10.3389/fcell.2020.590898 (PMC7773934; doi:10.3389/fcell.2020.590898)
Supplement: Supplementary Table 1 — Univariate Cox regression of clinical and pathological factors in PTC patients. [file Table_1.XLSX]

## Sheet: Table S1
Supplementary Table 1. Univariate Cox regression of clinical and pathological factors in PTC patients.
	beta	HR (95% CI for HR)	wald.test	p.value			beta	HR (95% CI for HR)	wald.test	p.value
years_to_birth	0.0029	1 (0.98-1)	0.04	0.83		years_to_birth	0.022	1 (1-1)	5.8	0.016
pathologic_stage	0.69	2 (0.83-4.7)	2.4	0.12		pathologic_stage	0.96	2.6 (1.4-4.7)	10	0.0014
pathology_T	1.1	3.1 (1.3-7.3)	6.9	0.0088		pathology_T	0.91	2.5 (1.4-4.5)	8.8	0.003
pathology_N	1.1	2.9 (1.2-7)	5.3	0.021		pathology_N	0.47	1.6 (0.88-2.9)	2.4	0.12
gender	-0.018	0.98 (0.36-2.7)	0	0.97		gender	0.42	1.5 (0.83-2.8)	1.8	0.18
ETE	0.84	2.3 (1-5.4)	3.8	0.05		ETE	0.71	2 (1.1-3.7)	5.6	0.017
BRAF	0.077	1.1 (0.47-2.5)	0.03	0.86		BRAF	0.087	1.1 (0.6-2)	0.08	0.77
RAS	0.074	1.1 (0.25-4.6)	0.01	0.92		RAS	0.17	1.2 (0.47-3)	0.13	0.72
TERT	-0.57	0.56 (0.13-2.4)	0.6	0.44		TERT	1.1	3 (1.4-6.2)	8.7	0.0033
RET	17	2.6e+07 (0-Inf)	0	1		RET	-1	0.35 (0.048-2.5)	1.1	0.3
TBX22	-0.7	0.5 (0.21-1.2)	2.5	0.09		TBX22	-0.55	0.58 (0.32-1)	3.4	0.067

## Sheet: Table S2
Supplementary Table 2. TBX22 co-expressed genes detailed results.
gene2	cor	pvalue	entrezID
TBX22	1	0	50945
STXBP5L	0.815	2.76e-122	9515
SEMA3D	0.791	2.27e-110	223117
WSCD2	0.77	3.8e-101	9671
ASXL3	0.737	2.21e-88	80816
MRO	0.724	6.29e-84	83876
NWD1	0.711	1.59e-79	284434
CDON	0.709	6.17e-79	50937
MPPED2	0.703	5.36e-77	744
ITPR1	0.702	8.61e-77	3708
GPR98	0.699	8.13e-76	NA
KHDRBS2	0.699	8.59e-76	202559
C12orf39	0.692	7.62e-74	NA
ARHGAP24	0.691	1.62e-73	83478
TPTE2P1	0.691	2.47e-73	646405
SLC4A4	0.69	2.58e-73	8671
FER1L6	0.687	3.32e-72	654463
SORBS2	0.683	4.13e-71	8470
ELMO1	0.681	1.21e-70	9844
HGD	0.677	1.56e-69	3081
SHANK2	0.673	2.51e-68	22941
GRIN2C	0.671	6.23e-68	2905
KIT	0.671	7.92e-68	3815
LRP1B	0.67	1.08e-67	53353
TFF3	0.668	5.27e-67	7033
EBF4	0.667	8.5e-67	57593
PRUNE	0.665	3.48e-66	NA
CAPSL	0.664	4.95e-66	133690
BMP8A	0.663	1.11e-65	353500
GNA14	0.662	1.3e-65	9630
ZNF804B	0.661	2.56e-65	219578
ERO1LB	0.657	3.37e-64	NA
HSP90B1	0.656	5e-64	7184
GPR125	0.656	5.4e-64	NA
UBE2O	0.653	3.33e-63	63893
MT1F	0.652	7.02e-63	4494
TBC1D4	0.65	1.61e-62	9882
ZMAT4	0.65	1.64e-62	79698
IFT140	0.647	1.33e-61	9742
MLLT3	0.645	3.6e-61	4300
IRS1	0.645	3.83e-61	3667
RIC8B	0.644	5.7e-61	55188
SLC16A2	0.644	7.46e-61	6567
FAM63A	0.643	8.07e-61	NA
KCNK2	0.642	1.39e-60	3776
C16orf46	0.642	1.54e-60	123775
MLEC	0.641	2.53e-60	9761
TTC30A	0.641	2.68e-60	92104
TPO	0.641	2.83e-60	7173
FCGBP	0.639	8.75e-60	8857
DPP6	0.639	1e-59	1804
DIO1	0.638	1.67e-59	1733
ESRRG	0.638	1.98e-59	2104
CYB561	0.637	3.33e-59	1534
SPATA2	0.636	3.89e-59	9825
KCNJ13	0.636	5.28e-59	3769
GPAM	0.635	7.66e-59	57678
LMOD1	0.634	1.1e-58	25802
C4orf38	0.634	1.44e-58	NA
TFCP2L1	0.633	2.29e-58	29842
ELAC1	0.633	2.78e-58	55520
TCF7L1	0.632	3.59e-58	83439
SLC26A7	0.632	5.15e-58	115111
ANKRD20B	0.63	9.84e-58	NA
PKHD1L1	0.63	1.09e-57	93035
UPF0639	0.63	1.48e-57	NA
DIRAS2	0.629	2.33e-57	54769
AAK1	0.629	2.57e-57	22848
TMEM50B	0.623	3.95e-56	757
SETD8	0.621	1.53e-55	NA
KCNAB1	0.62	2.09e-55	7881
BCL2	0.619	3.32e-55	596
SYNE1	0.619	4.13e-55	23345
LMAN2L	0.618	5e-55	81562
MT1G	0.618	5.1e-55	4495
ZNF536	0.616	1.31e-54	9745
WBSCR17	0.615	2.37e-54	NA
PKNOX2	0.612	1.08e-53	63876
CWH43	0.612	1.6e-53	80157
BFSP1	0.611	1.94e-53	631
CALR	0.609	6.17e-53	811
PGCP	0.609	7e-53	NA
RANBP3L	0.608	8.76e-53	202151
PCDP1	0.608	9.03e-53	NA
DGKI	0.608	1.07e-52	9162
LRRC50	0.607	1.39e-52	NA
C6orf165	0.606	1.97e-52	NA
CTH	0.606	2.17e-52	1491
ANKRD46	0.606	2.71e-52	157567
LOC653501	0.605	3.59e-52	NA
FLRT1	0.604	5.23e-52	23769
ADIPOR2	0.604	7.31e-52	79602
IRS4	0.603	8.28e-52	8471
FZD8	0.603	1.04e-51	8325
CCDC146	0.603	1.09e-51	57639
FHL1	0.603	1.12e-51	2273
DUSP19	0.602	1.84e-51	142679
POLI	0.601	2.53e-51	11201
GRIK4	0.601	3.28e-51	2900
RNF150	0.599	6.29e-51	57484
NOL4	0.598	1.06e-50	8715
C11orf74	0.597	1.74e-50	119710
KATNAL2	0.597	1.91e-50	83473
CASC1	0.597	2.02e-50	55259
CDH16	0.597	2.08e-50	1014
SH2D6	0.596	2.9e-50	284948
BTBD11	0.596	3.18e-50	121551
SCML2	0.596	3.48e-50	10389
KY	0.595	4.78e-50	339855
HYOU1	0.594	6.88e-50	10525
KIAA1467	0.593	1.16e-49	NA
KCNK16	0.592	1.56e-49	83795
FMOD	0.592	1.59e-49	2331
PLEKHH1	0.592	1.69e-49	57475
RGS17	0.59	4.06e-49	26575
LINGO2	0.589	7.56e-49	158038
SCUBE3	0.588	9.66e-49	222663
CASC2	0.588	9.94e-49	255082
TH1L	0.588	1.21e-48	NA
PDIA5	0.588	1.26e-48	10954
GALNT10	0.587	1.72e-48	55568
MIOX	0.587	2.19e-48	55586
IQCH	0.587	2.26e-48	64799
FBXL5	0.586	2.55e-48	26234
PRKACB	0.586	3.45e-48	5567
FGF12	0.585	5.18e-48	2257
FAM167A	0.584	6.19e-48	83648
C9orf66	0.584	6.63e-48	NA
GHR	0.584	7.54e-48	2690
YIPF1	0.584	8.27e-48	54432
ATP2C2	0.584	8.28e-48	9914
FBLN7	0.584	8.93e-48	129804
FAM196B	0.583	9.12e-48	NA
COL9A3	0.583	1.14e-47	1299
RANBP10	0.582	1.56e-47	57610
PAX8	0.582	2.02e-47	7849
MARVELD2	0.582	2.05e-47	153562
PGF	0.581	2.37e-47	5228
LOC286002	0.581	2.49e-47	NA
SLC29A4	0.581	2.86e-47	222962
FAM116A	0.581	2.96e-47	NA
TDH	0.581	3.04e-47	157739
TECTA	0.58	4.24e-47	7007
TOM1L2	0.579	5.52e-47	146691
LOC284798	0.579	5.96e-47	284798
PEG3	0.579	6.09e-47	5178
MAGEL2	0.578	1.07e-46	54551
PLCD4	0.578	1.18e-46	84812
GFOD2	0.578	1.27e-46	81577
TRPM3	0.577	1.43e-46	80036
C2orf77	0.577	1.77e-46	NA
RFX4	0.577	1.81e-46	5992
SLC26A4	0.577	1.88e-46	5172
CYP7B1	0.576	2.32e-46	9420
BCDIN3D	0.576	2.38e-46	144233
DCAF17	0.576	2.65e-46	80067
STARD13	0.575	3.47e-46	90627
PRKCE	0.575	4.34e-46	5581
MTMR4	0.575	4.71e-46	9110
PRKG1	0.574	5.41e-46	5592
KCTD15	0.574	6.22e-46	79047
TTYH2	0.573	8.24e-46	94015
GP5	0.573	1.04e-45	2814
KIF19	0.572	1.25e-45	124602
CENPJ	0.572	1.41e-45	55835
PALM2	0.572	1.62e-45	NA
C14orf64	0.572	1.8e-45	NA
PRTG	0.571	2e-45	283659
GOLGA9P	0.571	2.08e-45	NA
WASF3	0.571	2.39e-45	10810
CYB5D1	0.571	2.52e-45	124637
ASTE1	0.57	2.84e-45	28990
PROX1	0.57	2.99e-45	5629
COLEC10	0.57	3.23e-45	10584
GSTM3	0.569	4.55e-45	2947
CNTN5	0.569	5.01e-45	53942
TRIM58	0.569	6.13e-45	25893
FBXO15	0.568	6.92e-45	201456
CCDC149	0.568	7.21e-45	91050
IGFBPL1	0.568	7.43e-45	347252
KSR1	0.568	7.89e-45	8844
C6orf89	0.567	1.17e-44	221477
OTOS	0.566	1.99e-44	150677
ARHGEF9	0.566	2.3e-44	23229
C5orf4	0.565	2.54e-44	NA
C12orf72	0.565	2.77e-44	NA
SLC5A8	0.565	3.25e-44	160728
AVPR1A	0.564	3.87e-44	552
AKAP3	0.564	3.91e-44	10566
MT1H	0.564	4.4e-44	4496
LOC284441	0.564	4.65e-44	284441
SYTL3	0.564	4.67e-44	94120
GLT8D1	0.563	5.5e-44	55830
GLDC	0.563	5.94e-44	2731
HLF	0.563	6.44e-44	3131
TMEM164	0.563	7.34e-44	84187
ACACB	0.563	7.91e-44	32
PLA2R1	0.562	1.09e-43	22925
LRGUK	0.562	1.09e-43	136332
CXXC4	0.561	1.39e-43	80319
GNAI1	0.561	1.63e-43	2770
RAG1	0.561	1.66e-43	5896
MYT1	0.561	1.68e-43	4661
METTL7A	0.56	1.95e-43	25840
STK25	0.56	2.08e-43	10494
KIAA1324	0.56	2.39e-43	57535
WNT4	0.56	2.8e-43	54361
RARB	0.559	2.99e-43	5915
RABL3	0.559	3.04e-43	285282
MPPE1	0.559	3.27e-43	65258
HSPA5	0.559	4.21e-43	3309
RBM20	0.558	5.33e-43	282996
FARS2	0.558	6.12e-43	10667
BMP8B	0.558	6.15e-43	656
TXNL1	0.557	6.84e-43	9352
LOC100132354	0.557	7.51e-43	NA
CACNB4	0.557	7.56e-43	785
LOH12CR2	0.557	7.96e-43	503693
IL22RA1	0.557	8.13e-43	58985
LGI3	0.557	8.44e-43	203190
MLH3	0.557	8.57e-43	27030
IQGAP2	0.557	9.34e-43	10788
KIAA1614	0.557	9.95e-43	57710
PARP8	0.556	1.08e-42	79668
FAM65C	0.556	1.36e-42	NA
ADAMTS3	0.556	1.5e-42	9508
TMEM220	0.555	2.04e-42	388335
C3orf33	0.555	2.1e-42	285315
MT1M	0.554	2.93e-42	4499
ID4	0.554	3.21e-42	3400
SUSD5	0.553	3.73e-42	26032
CIB4	0.553	4.13e-42	130106
PBX4	0.552	6.19e-42	80714
PDIA4	0.552	7.4e-42	9601
MOSC1	0.552	7.47e-42	NA
CECR2	0.551	8.06e-42	27443
TTC23L	0.551	8.63e-42	153657
LOC201651	0.551	8.73e-42	NA
CHRFAM7A	0.551	9.68e-42	89832
C16orf71	0.551	9.68e-42	146562
CCDC110	0.551	1.14e-41	256309
TCTN1	0.55	1.21e-41	79600
XPA	0.55	1.44e-41	7507
CCDC36	0.55	1.66e-41	339834
TTC30B	0.55	1.7e-41	150737
LOC253724	0.549	1.74e-41	NA
QRICH2	0.549	1.88e-41	84074
PDIA6	0.549	2.24e-41	10130
MATN2	0.549	2.42e-41	4147
HTR1E	0.548	2.9e-41	3354
PRICKLE2	0.548	3.22e-41	166336
UBE2G2	0.548	3.5e-41	7327
ANGPTL1	0.548	3.72e-41	9068
OR2W3	0.547	3.89e-41	343171
MAPK10	0.547	4.16e-41	5602
CCDC87	0.547	4.88e-41	55231
SPATA4	0.547	4.94e-41	132851
RGS16	0.546	5.7e-41	6004
IP6K3	0.546	6.78e-41	117283
PCLO	0.546	7.18e-41	27445
C8orf48	0.546	7.66e-41	157773
GARNL3	0.546	8.1e-41	84253
CRY2	0.546	8.4e-41	1408
MINA	0.545	1.04e-40	NA
LRRC67	0.545	1.14e-40	NA
TCFL5	0.545	1.24e-40	10732
LRRIQ1	0.544	1.29e-40	84125
DZIP3	0.544	1.73e-40	9666
GABRB3	0.544	1.73e-40	2562
C16orf89	0.543	1.88e-40	146556
ZNF346	0.543	1.89e-40	23567
C14orf86	0.543	2.57e-40	NA
CGNL1	0.543	2.69e-40	84952
C10orf79	0.543	2.73e-40	NA
CORO2B	0.542	2.75e-40	10391
PDIA3	0.542	2.84e-40	2923
LOC158572	0.542	3.12e-40	NA
OLFM3	0.541	5.16e-40	118427
EML1	0.541	5.16e-40	2009
FBXO16	0.54	7.25e-40	157574
RPS6KA6	0.538	1.33e-39	27330
TG	0.538	1.38e-39	7038
IFT88	0.538	1.49e-39	8100
FLJ42875	0.538	1.64e-39	NA
LOC642852	0.538	1.84e-39	NA
FOXP2	0.537	2.01e-39	93986
CCDC65	0.537	2.13e-39	85478
IPCEF1	0.536	2.83e-39	26034
C18orf34	0.536	3.05e-39	NA
LRP2	0.536	3.35e-39	4036
RILPL1	0.536	3.98e-39	353116
WWOX	0.535	4.46e-39	51741
PRDM11	0.535	5.32e-39	56981
DNAH7	0.534	6.23e-39	56171
TP53INP2	0.534	6.32e-39	58476
TSNAXIP1	0.534	6.93e-39	55815
TMEM218	0.534	7.4e-39	219854
NUCB2	0.534	7.64e-39	4925
TMEM20	0.534	7.78e-39	NA
SIRT4	0.534	8.09e-39	23409
ACSF2	0.534	8.41e-39	80221
LRRIQ3	0.534	8.78e-39	127255
NEB	0.533	9.91e-39	4703
PRPSAP1	0.533	1.23e-38	5635
GLT8D2	0.533	1.26e-38	83468
C20orf12	0.532	1.34e-38	NA
WDR65	0.532	1.58e-38	NA
CLN5	0.532	1.63e-38	1203
SLC7A6	0.532	1.65e-38	9057
PRSS16	0.531	2.02e-38	10279
TEKT4	0.531	2.39e-38	150483
AGPAT4	0.531	2.65e-38	56895
VEGFA	0.53	3.02e-38	7422
LOC144571	0.53	3.05e-38	NA
FOXJ1	0.53	3.74e-38	2302
PLCH1	0.53	3.78e-38	23007
MUM1L1	0.529	4.2e-38	NA
C10orf26	0.529	4.81e-38	NA
KCTD2	0.528	6.93e-38	23510
DEPDC6	0.528	8.33e-38	NA
TMEM232	0.527	9.37e-38	642987
COL4A6	0.527	1.21e-37	1288
ZNF781	0.526	1.32e-37	163115
COL25A1	0.526	1.48e-37	84570
CYP46A1	0.526	1.51e-37	10858
FBF1	0.525	1.83e-37	85302
RAVER2	0.525	1.87e-37	55225
C9orf122	0.525	1.95e-37	NA
PLCL1	0.525	1.95e-37	5334
RAGE	0.525	2.05e-37	NA
GCK	0.525	2.11e-37	2645
EML6	0.525	2.24e-37	400954
RIMKLA	0.525	2.27e-37	284716
THAP9	0.525	2.53e-37	79725
EFCAB12	0.524	2.59e-37	90288
NEXN	0.524	2.63e-37	91624
EXT1	0.524	3.14e-37	2131
SULT1A2	0.524	3.51e-37	6799
SALL4	0.523	3.81e-37	57167
SYNM	0.523	3.91e-37	23336
ANK2	0.523	4.13e-37	287
LOC100130238	0.523	4.16e-37	100130238
ZBTB2	0.523	4.67e-37	57621
MTCH1	0.523	4.77e-37	23787
ESAM	0.523	4.96e-37	90952
C14orf148	0.523	5.03e-37	NA
FAM36A	0.522	5.7e-37	NA
ZNF491	0.522	6e-37	126069
CYTH3	0.522	6.01e-37	9265
ZNF438	0.522	6.3e-37	220929
USP44	0.522	6.91e-37	84101
CRELD1	0.521	7.83e-37	78987
TRPC6	0.521	9.48e-37	7225
LEKR1	0.521	9.89e-37	389170
MDH1B	0.521	9.98e-37	130752
LIPG	0.52	1.11e-36	9388
CA4	0.52	1.29e-36	762
PIH1D2	0.52	1.33e-36	120379
GCSH	0.52	1.46e-36	2653
UGT8	0.52	1.53e-36	7368
FAM189A2	0.519	1.59e-36	9413
USP49	0.519	1.63e-36	25862
BCAP29	0.519	1.7e-36	55973
C15orf51	0.519	1.77e-36	NA
LOC442421	0.519	1.79e-36	NA
PHKB	0.519	1.82e-36	5257
RG9MTD2	0.519	2.03e-36	NA
PRKCQ	0.518	2.8e-36	5588
DPY19L2	0.518	2.82e-36	283417
CLCNKB	0.518	2.94e-36	1188
KCTD8	0.517	3.56e-36	386617
TRIP4	0.517	3.78e-36	9325
DOK6	0.517	3.78e-36	220164
CDC14B	0.517	3.99e-36	8555
SYT9	0.517	4.01e-36	143425
GDF10	0.517	4.09e-36	2662
SETMAR	0.516	5.73e-36	6419
TMEM135	0.516	5.77e-36	65084
C20orf132	0.516	6.53e-36	NA
LYRM7	0.515	6.88e-36	90624
CANX	0.515	7.28e-36	821
FBXO9	0.515	7.55e-36	26268
PDIA3P	0.515	8.55e-36	NA
KCTD10	0.514	9.86e-36	83892
AQP4	0.514	9.89e-36	361
HTR7P1	0.514	9.93e-36	93164
LIFR	0.514	1.04e-35	3977
ZNF763	0.514	1.15e-35	284390
CRELD2	0.514	1.27e-35	79174
SLC35D2	0.513	1.38e-35	11046
EFHC2	0.513	1.43e-35	80258
INPP5A	0.513	1.56e-35	3632
OPHN1	0.513	1.62e-35	4983
ADAMTS5	0.513	1.67e-35	11096
FAM82B	0.513	1.79e-35	NA
PTPRQ	0.512	2e-35	374462
USP40	0.512	2.04e-35	55230
ANK3	0.512	2.15e-35	288
C4orf39	0.512	2.37e-35	NA
HIST1H4H	0.512	2.38e-35	NA
C17orf80	0.512	2.46e-35	55028
MARK3	0.512	2.5e-35	4140
ADIG	0.512	2.6e-35	149685
FAM13C	0.511	3.24e-35	220965
OR2A1	0.51	4e-35	346528
ENPP3	0.51	4.02e-35	5169
SH3RF1	0.51	4.06e-35	57630
PRMT10	0.51	4.54e-35	NA
RAG2	0.51	4.76e-35	5897
MAGT1	0.509	6.2e-35	84061
LCLAT1	0.509	6.31e-35	253558
CACNA2D2	0.509	7.22e-35	9254
DYRK3	0.509	7.89e-35	8444
DNAJC3	0.508	8.26e-35	5611
SLC25A42	0.508	8.7e-35	284439
GALNTL4	0.508	8.99e-35	NA
ANAPC13	0.508	9.98e-35	25847
PPIL1	0.507	1.4e-34	51645
ANKRD5	0.507	1.4e-34	NA
LCA5L	0.507	1.41e-34	150082
PYGM	0.507	1.44e-34	5837
CLCNKA	0.507	1.47e-34	1187
ODZ2	0.506	1.61e-34	NA
DCLK2	0.506	1.64e-34	166614
MYH3	0.505	2.42e-34	4621
IQCG	0.505	2.59e-34	84223
CHRNA7	0.505	2.62e-34	1139
MID1	0.505	2.67e-34	4281
RDH11	0.505	2.72e-34	51109
MAP6	0.505	2.91e-34	4135
B3GALNT2	0.505	2.94e-34	148789
DHRS7	0.505	3.12e-34	51635
RUSC2	0.505	3.13e-34	9853
TPST1	0.504	3.31e-34	8460
FAM119B	0.504	4.15e-34	NA
SLC25A45	0.504	4.4e-34	283130
FGF11	0.503	4.86e-34	2256
WDR93	0.503	5.34e-34	56964
MT1E	0.503	5.36e-34	4493
ENKUR	0.503	5.65e-34	219670
ANKS1B	0.503	5.7e-34	56899
SLC1A2	0.503	6.36e-34	6506
TMCO1	0.502	6.58e-34	54499
LRRC7	0.502	7e-34	57554
ZNF271	0.502	7.02e-34	NA
SNED1	0.502	7.21e-34	25992
DIS3L	0.502	7.58e-34	115752
CYP27B1	0.502	8.46e-34	1594
LPGAT1	0.501	1.03e-33	9926
FDX1	0.501	1.11e-33	2230
SLITRK5	0.501	1.22e-33	26050
PRPS1	0.5	1.41e-33	5631
COL23A1	0.5	1.54e-33	91522
C12orf23	0.5	1.68e-33	NA
KIAA0556	0.5	1.7e-33	23247
ZNF396	0.499	1.82e-33	252884
TLE6	0.499	1.82e-33	79816
HMGCR	0.499	1.89e-33	3156
GORASP1	0.499	1.93e-33	64689
SPATA17	0.499	2.02e-33	128153
DSTN	0.499	2.25e-33	11034
MYO1H	0.499	2.28e-33	283446
RALGPS1	0.499	2.39e-33	9649
COL4A5	0.498	2.51e-33	1287
B3GALT2	0.498	2.59e-33	8707
AACS	0.498	2.62e-33	65985
MOSC2	0.498	2.86e-33	NA
PRDM16	0.498	2.9e-33	63976
TRIM41	0.498	3.12e-33	90933
SAMD5	0.498	3.16e-33	389432
C10orf107	0.497	4.62e-33	NA
ZNF652	0.496	5.11e-33	22834
SLC10A7	0.496	5.18e-33	84068
TLE1	0.496	5.25e-33	7088
SLC39A14	0.496	5.34e-33	23516
KCNE3	0.496	5.5e-33	10008
SELV	0.496	6.09e-33	NA
LOC283174	0.496	6.15e-33	NA
SELENBP1	0.496	6.25e-33	8991
GPM6A	0.495	6.89e-33	2823
PPARGC1A	0.495	7.07e-33	10891
TDGF1	0.495	7.61e-33	6997
BBS4	0.495	7.7e-33	585
MAPK4	0.495	7.81e-33	5596
CNST	0.495	7.83e-33	163882
MAGED2	0.495	8.33e-33	10916
ANKRD20A3	0.495	8.51e-33	441425
LAYN	0.495	8.85e-33	143903
SOD3	0.494	1.08e-32	6649
WFS1	0.494	1.08e-32	7466
GJB1	0.494	1.08e-32	2705
C2orf42	0.494	1.33e-32	54980
SLC22A23	0.493	1.34e-32	63027
TM2D2	0.493	1.36e-32	83877
TPMT	0.493	1.71e-32	7172
IGDCC3	0.492	1.87e-32	9543
LRRC6	0.492	1.94e-32	23639
C9orf156	0.492	2.24e-32	NA
MMEL1	0.492	2.34e-32	79258
TMEM171	0.491	2.67e-32	134285
WDR72	0.491	2.83e-32	256764
SLC20A2	0.491	2.84e-32	6575
CHST14	0.491	3.05e-32	113189
POMT2	0.491	3.22e-32	29954
PSPH	0.491	3.53e-32	5723
NGFRAP1	0.49	3.62e-32	NA
L3MBTL4	0.49	3.66e-32	91133
KDM4B	0.49	3.91e-32	23030
SMARCA2	0.49	4.48e-32	6595
MTERFD2	0.49	4.51e-32	NA
AGXT2L1	0.49	4.91e-32	NA
LOC80054	0.489	5.37e-32	NA
PDE8B	0.489	5.56e-32	8622
PDE11A	0.489	6.26e-32	50940
ABCC8	0.489	6.46e-32	6833
LNP1	0.489	6.49e-32	348801
ZADH2	0.488	7.61e-32	284273
NUS1	0.488	7.93e-32	116150
RTN3	0.488	8.35e-32	10313
CLUL1	0.488	8.49e-32	27098
FAM7A3	0.488	8.68e-32	NA
ZNF782	0.488	8.73e-32	158431
SUV420H1	0.488	8.92e-32	NA
PHF20L1	0.487	1.12e-31	51105
TCEANC	0.487	1.15e-31	170082
CSGALNACT1	0.487	1.25e-31	55790
OSCP1	0.486	1.39e-31	127700
TNFRSF11B	0.486	1.5e-31	4982
NDNL2	0.486	1.51e-31	NA
LOC100286844	0.486	1.67e-31	NA
FBXL2	0.486	1.68e-31	25827
FREM2	0.486	1.69e-31	341640
AR	0.486	1.85e-31	367
FLJ35024	0.485	2.03e-31	NA
LOC100131691	0.485	2.05e-31	NA
DNAH6	0.485	2.18e-31	1768
SLC39A7	0.485	2.25e-31	7922
NUDT16	0.485	2.28e-31	131870
FABP4	0.485	2.29e-31	2167
LOC88214	0.485	2.34e-31	NA
LOC401431	0.485	2.43e-31	NA
PLEKHG4B	0.484	2.63e-31	153478
C11orf65	0.484	2.66e-31	160140
EIF2B2	0.484	2.91e-31	8892
KLHL8	0.484	3.3e-31	57563
OR2T8	0.484	3.4e-31	343172
PGBD2	0.484	3.41e-31	267002
IL11RA	0.484	3.45e-31	3590
C6orf155	0.483	4.49e-31	NA
HIST1H2BC	0.483	4.52e-31	NA
DDOST	0.482	4.92e-31	1650
LOC440905	0.482	4.96e-31	NA
FBXO36	0.482	5.41e-31	130888
C14orf174	0.481	6.81e-31	NA
PPM1L	0.481	7.45e-31	151742
ELOVL1	0.481	8e-31	64834
DNAJB11	0.481	9.15e-31	51726
OR2A9P	0.48	9.39e-31	441295
RYR2	0.48	9.66e-31	6262
MMP15	0.48	1.09e-30	4324
PAIP2B	0.48	1.17e-30	400961
COPZ1	0.48	1.18e-30	22818
ITM2A	0.48	1.18e-30	9452
CDR2	0.479	1.3e-30	1039
SGK1	0.479	1.31e-30	6446
THUMPD1	0.479	1.35e-30	55623
NFIA	0.479	1.35e-30	4774
SCGB2A1	0.479	1.37e-30	4246
OAZ2	0.479	1.45e-30	4947
TMEM14B	0.479	1.49e-30	81853
TPI1P2	0.479	1.56e-30	286016
DHX29	0.479	1.57e-30	54505
ACOX2	0.479	1.6e-30	8309
ZNF737	0.479	1.61e-30	100129842
PRIMA1	0.478	1.77e-30	145270
TMEM170B	0.478	1.84e-30	100113407
FOXE1	0.478	1.85e-30	2304
AGTR1	0.478	2.2e-30	185
KIF6	0.478	2.25e-30	221458
CCDC40	0.478	2.32e-30	55036
INPPL1	0.478	2.33e-30	3636
LOC387646	0.477	2.44e-30	NA
C2CD2	0.477	2.51e-30	25966
FER1L5	0.477	2.53e-30	90342
ALDH9A1	0.477	2.59e-30	223
CD36	0.477	2.75e-30	948
TNS1	0.477	2.77e-30	7145
RHOBTB1	0.477	2.9e-30	9886
FOXO1	0.477	3.08e-30	2308
DNMT3B	0.477	3.1e-30	1789
MESDC2	0.477	3.22e-30	NA
SLC35B1	0.476	3.27e-30	10237
MAGI1	0.476	3.64e-30	9223
SLC15A2	0.476	3.65e-30	6565
C20orf96	0.476	3.76e-30	140680
MT1DP	0.476	3.77e-30	326343
AGPHD1	0.476	3.89e-30	NA
ZNF658	0.476	4.11e-30	26149
LATS2	0.476	4.19e-30	26524
SALL2	0.476	4.3e-30	6297
ZNF197	0.475	4.77e-30	10168
EBAG9	0.475	5.79e-30	9166
MAP2K6	0.475	5.9e-30	5608
PEX11A	0.474	6.26e-30	8800
ARSK	0.474	6.91e-30	153642
TRMT5	0.474	7.67e-30	57570
LRTOMT	0.474	7.87e-30	220074
HSD17B6	0.474	8.21e-30	8630
HSPB11	0.473	8.84e-30	51668
C14orf45	0.473	8.98e-30	NA
PFKFB1	0.473	9.25e-30	5207
IL17D	0.473	9.72e-30	53342
NDFIP1	0.473	1.03e-29	80762
MYCL1	0.473	1.07e-29	NA
NAP1L5	0.473	1.07e-29	266812
NAP1L2	0.472	1.16e-29	4674
KIAA2022	0.472	1.26e-29	NA
TSGA10	0.472	1.36e-29	80705
MAPKBP1	0.472	1.37e-29	23005
SLC25A15	0.472	1.38e-29	10166
C6orf97	0.472	1.39e-29	NA
GPD1L	0.472	1.48e-29	23171
NUDT16P1	0.472	1.48e-29	152195
SLC33A1	0.472	1.52e-29	9197
DLG2	0.472	1.54e-29	1740
DUOXA2	0.471	1.74e-29	405753
SMARCAL1	0.471	1.97e-29	50485
LOC338758	0.471	2.01e-29	NA
TMEM104	0.47	2.15e-29	54868
CCDC13	0.47	2.23e-29	152206
TRIT1	0.47	2.41e-29	54802
SLC39A11	0.47	2.74e-29	201266
FAM81B	0.47	2.74e-29	153643
RASSF9	0.47	2.78e-29	9182
RGS8	0.469	2.95e-29	85397
CCDC30	0.469	3.5e-29	728621
PAPOLG	0.469	3.54e-29	64895
ZKSCAN5	0.469	3.55e-29	23660
TEX261	0.468	4.06e-29	113419
PREX2	0.468	4.24e-29	80243
PDE8A	0.468	4.59e-29	5151
DNAL1	0.468	4.61e-29	83544
ARHGAP22	0.468	4.74e-29	58504
VLDLR	0.468	5.04e-29	7436
TAPT1	0.468	5.1e-29	202018
CSRP2	0.467	5.48e-29	1466
NETO2	0.467	5.48e-29	81831
ZFP36L2	0.467	5.58e-29	678
ANKRD37	0.467	5.59e-29	353322
GRB14	0.467	5.79e-29	2888
HIST1H3E	0.467	5.9e-29	NA
MANF	0.467	6.03e-29	7873
KILLIN	0.467	6.36e-29	NA
C6orf225	0.467	6.69e-29	NA
ZNF22	0.467	6.99e-29	7570
HAP1	0.467	7.04e-29	9001
SPEF2	0.466	7.38e-29	79925
RCAN2	0.466	7.47e-29	10231
TMED8	0.466	7.5e-29	283578
FAM182B	0.466	7.57e-29	728882
CDADC1	0.466	8.05e-29	81602
DTWD1	0.466	9.19e-29	56986
PHLPP1	0.465	1.11e-28	23239
ABAT	0.465	1.11e-28	18
CAPS2	0.465	1.16e-28	84698
SYP	0.465	1.27e-28	6855
KCNIP3	0.465	1.29e-28	30818
C9orf96	0.465	1.29e-28	NA
ODAM	0.464	1.38e-28	54959
DPY19L2P4	0.464	1.4e-28	442523
DYNC1I1	0.464	1.41e-28	1780
HK1	0.464	1.49e-28	3098
SLC25A33	0.464	1.59e-28	84275
FARP2	0.464	1.61e-28	9855
IMPA2	0.464	1.63e-28	3613
MAGI2	0.464	1.71e-28	9863
SNPH	0.464	1.72e-28	9751
SLC25A38	0.463	1.88e-28	54977
LRRC4C	0.463	1.88e-28	57689
SCTR	0.463	1.94e-28	6344
COIL	0.463	2.02e-28	8161
ASRGL1	0.463	2.04e-28	80150
AGBL4	0.463	2.1e-28	84871
SGK494	0.463	2.24e-28	NA
ARHGAP28	0.463	2.39e-28	79822
HFM1	0.462	2.47e-28	164045
CLMN	0.462	2.5e-28	79789
HSD17B3	0.462	2.54e-28	3293
TEX2	0.462	2.59e-28	55852
ZCWPW2	0.462	2.83e-28	152098
MAP1LC3A	0.462	3.05e-28	84557
FAAH	0.462	3.05e-28	2166
TTLL7	0.462	3.12e-28	79739
KCNK17	0.461	3.4e-28	89822
AHCYL2	0.461	3.43e-28	23382
COPZ2	0.461	3.69e-28	51226
LDHD	0.461	3.87e-28	197257
SLC24A3	0.461	4.03e-28	57419
USP16	0.461	4.21e-28	10600
MT1L	0.46	4.53e-28	4500
SKA2	0.46	4.64e-28	348235
NSUN4	0.46	4.74e-28	387338
LRRC2	0.46	4.77e-28	79442
CCDC126	0.46	4.77e-28	90693
KIAA1529	0.46	4.99e-28	NA
NECAB1	0.46	5.08e-28	64168
PABPC5	0.46	5.22e-28	140886
RSPH4A	0.46	5.29e-28	345895
TRERF1	0.46	5.32e-28	55809
CDNF	0.46	5.41e-28	441549
ISM1	0.46	5.43e-28	140862
SOSTDC1	0.459	6.06e-28	25928
CNOT4	0.459	6.13e-28	4850
ABCB6	0.459	6.7e-28	10058
ZNF833	0.459	7.2e-28	NA
IYD	0.459	7.58e-28	389434
EDN3	0.459	7.71e-28	1908
MSI1	0.458	8e-28	4440
CD302	0.458	8.08e-28	9936
PLK1S1	0.458	8.11e-28	NA
C7orf52	0.458	9.71e-28	NA
RADIL	0.458	1.05e-27	55698
TMEM167B	0.457	1.09e-27	56900
CATSPER2P1	0.457	1.14e-27	440278
ZNF527	0.457	1.15e-27	84503
KIF5A	0.457	1.22e-27	3798
SEC62	0.457	1.24e-27	7095
C17orf91	0.457	1.27e-27	NA
GPR155	0.457	1.27e-27	151556
ANKK1	0.457	1.28e-27	255239
C8orf79	0.457	1.3e-27	NA
ARHGEF4	0.457	1.37e-27	50649
ARHGEF33	0.457	1.44e-27	100271715
RC3H1	0.456	1.58e-27	149041
NLK	0.456	1.6e-27	51701
HDHD2	0.456	1.62e-27	84064
TAF8	0.456	1.66e-27	129685
CABIN1	0.456	1.68e-27	23523
ZSCAN5A	0.456	1.85e-27	79149
GUSBL1	0.455	2.22e-27	NA
GIN1	0.455	2.23e-27	54826
ST6GALNAC3	0.455	2.25e-27	256435
AGL	0.455	2.29e-27	178
TCEB3	0.455	2.34e-27	NA
SPATA7	0.455	2.38e-27	55812
AXIN2	0.455	2.4e-27	8313
MAP3K4	0.455	2.41e-27	4216
ACSM5	0.455	2.48e-27	54988
SAPS3	0.455	2.56e-27	NA
FPGT	0.454	2.62e-27	8790
LOC653566	0.454	2.66e-27	NA
ATP1A1	0.454	2.67e-27	476
CCDC121	0.454	2.94e-27	79635
CKB	0.454	3.11e-27	1152
HEBP1	0.454	3.16e-27	50865
LOC100128164	0.454	3.4e-27	100128164
SDF2L1	0.454	3.42e-27	23753
C14orf126	0.453	3.49e-27	NA
RIBC1	0.453	3.5e-27	158787
EPHA5	0.453	3.66e-27	2044
ATG4C	0.453	3.89e-27	84938
HSD17B4	0.453	3.9e-27	3295
ZNF512B	0.453	3.91e-27	57473
GOLGA1	0.453	4.26e-27	2800
C5orf23	0.453	4.28e-27	NA
KIAA1147	0.453	4.36e-27	NA
GUSBP3	0.453	4.5e-27	653188
ZNF618	0.452	4.93e-27	114991
DIO2	0.452	5.16e-27	1734
C1orf64	0.452	5.37e-27	NA
DYNLRB2	0.452	5.46e-27	83657
C7orf41	0.452	5.96e-27	NA
SDC2	0.452	6.03e-27	6383
SSPO	0.452	6.05e-27	23145
C2orf73	0.452	6.07e-27	129852
ARMC2	0.451	6.53e-27	84071
FAM13A	0.451	7.04e-27	10144
CRABP1	0.451	7.08e-27	1381
LOC728723	0.451	7.47e-27	NA
TRAM2	0.451	7.48e-27	9697
RIMKLB	0.45	8.48e-27	57494
KCNQ1	0.45	8.78e-27	3784
WHAMML1	0.45	9.72e-27	NA
GEMIN8P4	0.45	9.92e-27	492303
NEGR1	0.45	1.01e-26	257194
SNX11	0.45	1.01e-26	29916
GTF3C1	0.45	1.07e-26	2975
PVRL3	0.449	1.19e-26	NA
HSD11B2	0.449	1.19e-26	3291
SLC27A4	0.449	1.22e-26	10999
CXCR7	0.449	1.25e-26	NA
MAFB	0.449	1.32e-26	9935
IVD	0.449	1.36e-26	3712
ZNF280B	0.449	1.37e-26	140883
KCNK3	0.449	1.41e-26	3777
BTNL9	0.449	1.44e-26	153579
ISCA1	0.448	1.62e-26	81689
NUMB	0.448	1.82e-26	8650
AP4S1	0.448	1.86e-26	11154
BCO2	0.448	1.9e-26	83875
MRS2	0.448	1.94e-26	57380
GRAMD1B	0.447	1.98e-26	57476
C11orf63	0.447	2.23e-26	NA
GGTLC1	0.447	2.27e-26	92086
C19orf23	0.447	2.31e-26	NA
TSPAN7	0.447	2.37e-26	7102
NAA40	0.447	2.37e-26	79829
F8	0.447	2.55e-26	2157
AGPAT9	0.446	2.69e-26	NA
CNTFR	0.446	2.75e-26	1271
MYLK4	0.446	2.94e-26	340156
TPPP	0.446	3.05e-26	11076
AOX1	0.446	3.16e-26	316
C11orf35	0.446	3.24e-26	NA
FLT4	0.446	3.27e-26	2324
TUBA4B	0.445	3.67e-26	80086
RILPL2	0.445	3.69e-26	196383
POLR3B	0.445	4.13e-26	55703
PDGFD	0.445	4.24e-26	80310
HSBP1	0.445	4.39e-26	3281
LIMCH1	0.445	4.41e-26	22998
ATP6V0E2	0.445	4.41e-26	155066
LRRTM2	0.444	5.01e-26	26045
MGC57346	0.444	5.08e-26	NA
TMEM99	0.444	5.11e-26	147184
SNX4	0.444	5.14e-26	8723
IER2	0.444	5.32e-26	9592
RSPH6A	0.444	5.46e-26	81492
ROPN1L	0.444	5.57e-26	83853
HIVEP3	0.443	6.23e-26	59269
CABLES1	0.443	6.49e-26	91768
C4orf47	0.443	6.56e-26	441054
FZD4	0.443	6.97e-26	8322
ZNF541	0.443	6.98e-26	84215
PMS2	0.443	7e-26	5395
TCTA	0.443	7.44e-26	6988
OLFM2	0.442	8.18e-26	93145
RAPGEF2	0.442	8.58e-26	9693
C4orf46	0.442	9.27e-26	201725
CNTN3	0.442	9.96e-26	5067
NCRNA00092	0.441	1.1e-25	NA
ZC4H2	0.441	1.11e-25	55906
FAM155B	0.441	1.3e-25	27112
TMEM19	0.441	1.39e-25	55266
PPP1R13B	0.441	1.41e-25	23368
TBC1D19	0.44	1.45e-25	55296
CLCC1	0.44	1.45e-25	23155
ZNF434	0.44	1.55e-25	NA
CHD3	0.44	1.64e-25	1107
TUBB1	0.44	1.69e-25	81027
CARKD	0.44	1.7e-25	NA
BRD2	0.44	1.71e-25	6046
HACL1	0.44	1.77e-25	26061
MCCC2	0.439	1.94e-25	64087
C16orf86	0.439	1.98e-25	388284
SLC39A9	0.439	2e-25	55334
MDM1	0.439	2e-25	56890
VDAC3	0.439	2.06e-25	7419
TRAF6	0.439	2.08e-25	7189
MKRN2	0.439	2.11e-25	23609
LRP6	0.439	2.11e-25	4040
RAD51L3	0.439	2.28e-25	NA
FAM69A	0.439	2.31e-25	NA
SFRP1	0.439	2.33e-25	6422
ASPRV1	0.439	2.36e-25	151516
FAM101B	0.439	2.37e-25	NA
STOX2	0.438	2.55e-25	56977
TMEM57	0.438	2.59e-25	NA
C15orf52	0.438	2.62e-25	NA
SNX29	0.438	2.82e-25	92017
ZRANB3	0.438	3.2e-25	84083
DHDPSL	0.437	3.29e-25	NA
ADAT2	0.437	3.3e-25	134637
TRO	0.437	3.85e-25	7216
CCBP2	0.437	4.06e-25	NA
C9orf43	0.437	4.08e-25	257169
KDR	0.437	4.16e-25	3791
CEP152	0.436	4.64e-25	22995
GPER	0.436	4.86e-25	NA
RASSF6	0.436	4.89e-25	166824
DICER1	0.436	4.9e-25	23405
HIST1H2BN	0.436	4.96e-25	NA
FBXL3	0.436	5.02e-25	26224
OCA2	0.436	5.05e-25	4948
ADM2	0.436	5.27e-25	79924
FAM95B1	0.436	5.38e-25	100133036
GJB6	0.436	5.48e-25	10804
ABLIM2	0.436	5.6e-25	84448
LGMN	0.435	5.84e-25	5641
PEAR1	0.435	5.94e-25	375033
DNALI1	0.435	6e-25	7802
ANXA6	0.435	6.12e-25	309
SDPR	0.435	6.22e-25	NA
MED20	0.435	6.23e-25	9477
SPG7	0.435	6.27e-25	6687
DUOX2	0.435	6.44e-25	50506
FUBP3	0.435	6.45e-25	8939
ZBTB5	0.435	6.5e-25	9925
C4orf32	0.435	6.95e-25	NA
FAM124A	0.435	7.03e-25	220108
XK	0.435	7.27e-25	7504
LAMB4	0.434	7.52e-25	22798
ZFP3	0.434	7.62e-25	124961
ARRDC4	0.434	7.87e-25	91947
DPH3B	0.434	7.91e-25	NA
FAM190A	0.434	8.01e-25	NA
TUSC1	0.434	8.13e-25	286319
GLIS3	0.434	8.84e-25	169792
VPS16	0.434	8.99e-25	64601
SPCS3	0.434	9.7e-25	60559
SLC35B3	0.433	9.81e-25	51000
TLN2	0.433	9.97e-25	83660
FOXA2	0.433	1.02e-24	3170
LOC283070	0.433	1.02e-24	NA
BHLHB9	0.433	1.07e-24	80823
SETDB2	0.433	1.11e-24	83852
C12orf51	0.433	1.14e-24	NA
TCEAL2	0.433	1.15e-24	140597
LRRN2	0.433	1.24e-24	10446
CCDC11	0.433	1.29e-24	NA
SLC10A4	0.432	1.33e-24	201780
RFFL	0.432	1.38e-24	117584
TDRD6	0.432	1.39e-24	221400
GLMN	0.432	1.42e-24	11146
RND2	0.432	1.45e-24	8153
ZNF480	0.432	1.48e-24	147657
MPL	0.432	1.5e-24	4352
FLT1	0.432	1.53e-24	2321
ZNF569	0.432	1.54e-24	148266
IGDCC4	0.432	1.6e-24	57722
C20orf151	0.432	1.61e-24	NA
PDE7B	0.432	1.61e-24	27115
NDRG2	0.432	1.63e-24	57447
UNC119B	0.431	1.72e-24	84747
C9orf82	0.431	1.77e-24	NA
PAX6	0.431	1.97e-24	5080
SMAD5OS	0.431	2e-24	NA
CHKA	0.431	2e-24	1119
RNF216L	0.431	2.13e-24	NA
GZF1	0.431	2.15e-24	64412
FKBP1A	0.43	2.63e-24	2280
FBXO30	0.43	2.65e-24	84085
FKBP4	0.43	2.66e-24	2288
QDPR	0.43	2.77e-24	5860
CYP26B1	0.43	2.86e-24	56603
ME1	0.429	2.94e-24	4199
C6orf192	0.429	3.08e-24	NA
KIAA1377	0.429	3.19e-24	NA
AK7	0.429	3.26e-24	122481
TP53I11	0.429	3.3e-24	9537
LIPT2	0.429	3.34e-24	387787
MAGI3	0.429	3.6e-24	260425
PDLIM3	0.429	3.69e-24	27295
HMGN5	0.429	3.79e-24	79366
GLUL	0.428	3.83e-24	2752
NEK11	0.428	3.94e-24	79858
B3GNT9	0.428	3.98e-24	84752
ZSCAN1	0.428	4.01e-24	284312
ATXN7L3B	0.428	4.08e-24	552889
ZNF180	0.428	4.15e-24	7733
TMEM47	0.428	4.23e-24	83604
CARTPT	0.428	4.25e-24	9607
DCDC1	0.428	4.26e-24	341019
HIST1H2AK	0.428	4.27e-24	NA
SUOX	0.428	4.49e-24	6821
SCAND2	0.428	4.77e-24	NA
DUOX1	0.427	5.14e-24	53905
HSP90B3P	0.427	5.19e-24	343477
ZNF167	0.427	5.29e-24	NA
ITGA1	0.427	5.29e-24	3672
HNRNPA3	0.427	5.57e-24	220988
ATXN7L1	0.427	5.71e-24	222255
IGF2BP3	0.427	5.76e-24	10643
C5orf28	0.427	5.76e-24	NA
ZC3H8	0.426	6.52e-24	84524
MAPRE2	0.426	6.68e-24	10982
VIPR1	0.426	6.76e-24	7433
TSSC1	0.426	6.83e-24	NA
RCBTB2	0.426	7e-24	1102
KIAA1908	0.426	7.45e-24	NA
FAM53A	0.426	7.46e-24	152877
MYCT1	0.426	7.52e-24	80177
DBH	0.426	7.73e-24	1621
FAM173B	0.426	8.22e-24	NA
MKS1	0.426	8.45e-24	54903
RBM47	0.425	8.49e-24	54502
FAM7A2	0.425	8.51e-24	NA
NUDT6	0.425	8.63e-24	11162
TM9SF1	0.425	9.01e-24	10548
CUX1	0.425	9.32e-24	1523
ATP7B	0.425	1.01e-23	540
ERCC8	0.425	1.03e-23	1161
GCNT2	0.425	1.06e-23	2651
LOC100128788	0.425	1.07e-23	NA
MLLT1	0.425	1.1e-23	4298
EXTL2	0.425	1.1e-23	2135
TRIM66	0.425	1.1e-23	9866
MED8	0.424	1.11e-23	112950
LOC222699	0.424	1.14e-23	NA
ZNF506	0.424	1.15e-23	440515
WBP5	0.424	1.16e-23	NA
KCNIP4	0.424	1.21e-23	80333
TRIM16L	0.424	1.22e-23	147166
LRRC70	0.424	1.23e-23	100130733
TTPAL	0.424	1.34e-23	79183
ANO3	0.423	1.45e-23	63982
FBXO8	0.423	1.48e-23	26269
C2orf70	0.423	1.51e-23	NA
C7orf63	0.423	1.66e-23	NA
ADAL	0.423	1.78e-23	161823
ZC3H12B	0.423	1.8e-23	340554
RAP1GAP	0.423	1.81e-23	5909
SPAG5	0.423	1.85e-23	10615
WDR52	0.422	1.95e-23	NA
GPM6B	0.422	2.03e-23	2824
TXNDC15	0.422	2.11e-23	79770
KIAA1370	0.422	2.25e-23	NA
CALCOCO2	0.422	2.31e-23	10241
TRAPPC6A	0.422	2.38e-23	79090
LOC100130522	0.422	2.4e-23	NA
C12orf63	0.421	2.46e-23	NA
CDC14C	0.421	2.51e-23	168448
C1orf192	0.421	2.71e-23	NA
SOCS2	0.421	2.89e-23	8835
RWDD4A	0.421	2.9e-23	NA
TBCE	0.421	2.96e-23	6905
FAM189A1	0.421	3.11e-23	23359
LMLN	0.421	3.16e-23	89782
C1orf203	0.42	3.17e-23	NA
EIF4G3	0.42	3.23e-23	8672
NUDT9	0.42	3.23e-23	53343
BTNL8	0.42	3.24e-23	79908
EMCN	0.42	3.29e-23	51705
GLI3	0.42	3.36e-23	2737
RASGRP3	0.42	3.53e-23	25780
C1orf101	0.42	3.6e-23	NA
MT1X	0.42	3.73e-23	4501
SPTBN1	0.42	3.85e-23	6711
SYDE2	0.42	3.91e-23	84144
ZNF673	0.42	4.04e-23	NA
CCDC21	0.419	4.13e-23	NA
TMEM150C	0.419	4.15e-23	441027
ZHX3	0.419	4.42e-23	23051
DHX40	0.419	4.48e-23	79665
TNNI3K	0.419	4.8e-23	51086
FAM108B1	0.419	4.9e-23	NA
NT5C2	0.419	5.23e-23	22978
TMEM168	0.419	5.27e-23	64418
C20orf26	0.418	5.35e-23	NA
MAT2A	0.418	5.7e-23	4144
ZNF862	0.418	5.87e-23	643641
COG5	0.418	5.87e-23	10466
NT5C3L	0.418	5.99e-23	NA
WHAMML2	0.418	6.57e-23	NA
RDX	0.417	6.95e-23	5962
SULT1C4	0.417	7.19e-23	27233
LOC150197	0.417	7.32e-23	NA
INHBC	0.417	7.47e-23	3626
COQ7	0.417	7.62e-23	10229
CASP12	0.417	7.62e-23	100506742
CC2D2A	0.417	7.68e-23	57545
CETP	0.417	7.78e-23	1071
C19orf51	0.417	8.15e-23	NA
LOC100131193	0.417	8.44e-23	NA
LPCAT2	0.417	8.8e-23	54947
NEK10	0.416	8.95e-23	152110
ZMYND11	0.416	1e-22	10771
ZNF20	0.416	1.02e-22	7568
CDHR3	0.416	1.02e-22	222256
BEX1	0.416	1.04e-22	55859
ZNF709	0.416	1.04e-22	163051
GALC	0.416	1.05e-22	2581
ADAM22	0.416	1.05e-22	53616
ZNF518A	0.416	1.06e-22	9849
SCPEP1	0.416	1.08e-22	59342
PTPN21	0.415	1.2e-22	11099
BANK1	0.415	1.2e-22	55024
TATDN2	0.415	1.28e-22	9797
NICN1	0.415	1.34e-22	84276
CSNK1G1	0.415	1.38e-22	53944
TMED4	0.415	1.39e-22	222068
POFUT1	0.415	1.4e-22	23509
PIWIL2	0.415	1.48e-22	55124
HDAC4	0.414	1.52e-22	9759
CAB39L	0.414	1.61e-22	81617
CCDC48	0.414	1.66e-22	NA
ZC3H12C	0.414	1.66e-22	85463
BDNFOS	0.414	1.67e-22	NA
RAB1A	0.414	1.68e-22	5861
WDR20	0.414	1.71e-22	91833
LOC100303728	0.414	1.75e-22	NA
SUGT1L1	0.414	1.8e-22	NA
FHOD3	0.414	1.87e-22	80206
FLJ44606	0.414	1.88e-22	NA
HMGCS1	0.414	1.92e-22	3157
TMEM64	0.414	1.92e-22	169200
DNAJC5	0.413	1.93e-22	80331
PIK3R3	0.413	1.97e-22	8503
POFUT2	0.413	2e-22	23275
IPW	0.413	2.02e-22	3653
NHEDC1	0.413	2.05e-22	NA
NCOA5	0.413	2.07e-22	57727
MIA3	0.413	2.17e-22	375056
CDC42EP2	0.413	2.18e-22	10435
ACVR1B	0.413	2.36e-22	91
SNRNP25	0.412	2.5e-22	79622
SMAD9	0.412	2.66e-22	4093
CPXM1	0.412	3.04e-22	56265
UNC13C	0.412	3.13e-22	440279
GNMT	0.412	3.13e-22	27232
SDSL	0.412	3.14e-22	113675
PGGT1B	0.412	3.17e-22	5229
ZBTB25	0.411	3.42e-22	7597
USP46	0.411	3.55e-22	64854
FAHD2A	0.411	3.62e-22	51011
BTBD17	0.411	3.66e-22	388419
C15orf33	0.411	4.04e-22	NA
KRT222	0.411	4.06e-22	125113
SMOC2	0.41	4.14e-22	64094
DHTKD1	0.41	4.16e-22	55526
RUNX1T1	0.41	4.57e-22	862
ST7	0.41	4.87e-22	7982
ARL5A	0.41	4.94e-22	26225
UBN2	0.41	4.97e-22	254048
USP20	0.41	5.12e-22	10868
GNAL	0.41	5.26e-22	2774
FAM179B	0.409	5.52e-22	NA
PTPN9	0.409	5.71e-22	5780
CCDC81	0.409	5.79e-22	60494
C5orf30	0.409	5.83e-22	90355
ST7OT1	0.409	5.86e-22	NA
TAF11	0.409	6.08e-22	6882
SLC26A9	0.409	6.18e-22	115019
SLC2A8	0.409	6.31e-22	29988
THNSL1	0.409	6.53e-22	79896
MGC16275	0.409	6.82e-22	85001
SLCO2A1	0.408	7.17e-22	6578
ALG1	0.408	7.6e-22	56052
KIAA0652	0.408	7.84e-22	NA
C14orf176	0.408	7.89e-22	NA
TGIF2	0.408	8.03e-22	60436
ZNF287	0.408	8.19e-22	57336
ZBTB40	0.408	8.23e-22	9923
AASS	0.408	8.34e-22	10157
COLEC11	0.407	9.23e-22	78989
MEF2C	0.407	9.32e-22	4208
TRPV6	0.407	9.56e-22	55503
RG9MTD3	0.407	9.82e-22	NA
FAM126B	0.407	1e-21	285172
PIGN	0.407	1e-21	23556
ALKBH5	0.407	1.01e-21	54890
C16orf74	0.407	1.03e-21	404550
SCUBE1	0.407	1.03e-21	80274
FBXW10	0.407	1.12e-21	10517
SRPRB	0.406	1.17e-21	58477
WHSC1	0.406	1.18e-21	NA
CD24	0.406	1.18e-21	100133941
ZFP41	0.406	1.3e-21	286128
TRIM61	0.406	1.36e-21	391712
C9orf116	0.406	1.42e-21	138162
MYO10	0.405	1.53e-21	4651
TM4SF18	0.405	1.54e-21	116441
HHEX	0.405	1.61e-21	3087
IMPACT	0.405	1.61e-21	55364
IQCE	0.405	1.72e-21	23288
UST	0.405	1.75e-21	10090
ID3	0.405	1.76e-21	3399
TIMP4	0.405	1.77e-21	7079
ARL4D	0.405	1.79e-21	379
ZNF596	0.404	1.86e-21	169270
C1orf97	0.404	1.89e-21	NA
NPR3	0.404	1.96e-21	4883
GNG7	0.404	2e-21	2788
NCAM1	0.404	2.1e-21	4684
DIS3L2	0.404	2.19e-21	129563
TMED10	0.404	2.26e-21	10972
C13orf15	0.404	2.26e-21	NA
MYRIP	0.404	2.29e-21	25924
ATRNL1	0.404	2.3e-21	26033
C2orf3	0.404	2.3e-21	NA
FAF2	0.403	2.44e-21	23197
R3HDM1	0.403	2.53e-21	23518
SH2D4B	0.403	2.62e-21	387694
UNC80	0.403	2.63e-21	285175
SPCS2	0.403	2.65e-21	9789
FGFR2	0.403	2.65e-21	2263
MYH15	0.403	2.68e-21	22989
HELZ	0.403	2.8e-21	9931
FAM114A2	0.403	2.83e-21	10827
CACNA2D3	0.403	2.93e-21	55799
RGN	0.402	3.07e-21	9104
PARK2	0.402	3.21e-21	NA
POLR3F	0.402	3.29e-21	10621
ATP10D	0.402	3.5e-21	57205
PTCH2	0.402	3.52e-21	8643
MIS12	0.402	3.53e-21	79003
TNN	0.402	3.55e-21	63923
ZNF518B	0.402	3.86e-21	85460
CYP20A1	0.401	4.08e-21	57404
FAM35B	0.401	4.28e-21	NA
LOC400027	0.401	4.29e-21	NA
C1orf175	0.401	4.4e-21	NA
PNMAL1	0.401	4.71e-21	NA
SMO	0.401	4.87e-21	6608
CYR61	0.4	5.31e-21	NA
TMEM90B	0.4	5.64e-21	NA
TLK2	0.4	5.65e-21	11011
MGC42105	0.4	5.68e-21	NA
ALDH1A1	0.4	5.88e-21	216
HSDL1	0.4	5.97e-21	83693
PAPSS2	0.4	6.02e-21	9060
TRA2B	0.4	6.26e-21	6434
MUC20	-0.4	5.28e-21	200958
ELOVL7	-0.4	5.57e-21	79993
IGSF9	-0.4	5.59e-21	57549
CTSS	-0.4	5.71e-21	1520
DST	-0.4	5.89e-21	667
SLC25A37	-0.4	5.98e-21	51312
CD59	-0.4	6.16e-21	966
ZNRF2	-0.401	3.92e-21	223082
NCF2	-0.401	4.12e-21	4688
ESYT1	-0.401	4.14e-21	23344
PLXNA3	-0.401	4.74e-21	55558
IGSF3	-0.401	4.75e-21	3321
CLDN4	-0.402	3.25e-21	1364
N4BP3	-0.402	3.29e-21	23138
FTHL3	-0.402	3.36e-21	NA
ARNTL	-0.402	3.62e-21	406
HLA-DQA1	-0.402	3.83e-21	3117
RRS1	-0.403	2.52e-21	23212
ALDH1A3	-0.403	2.52e-21	220
TMEM98	-0.403	2.77e-21	26022
SH2D3A	-0.403	2.87e-21	10045
TMEM163	-0.403	2.93e-21	81615
H2AFY	-0.403	2.94e-21	NA
MDFIC	-0.403	2.96e-21	29969
REXO2	-0.404	1.91e-21	25996
CNIH4	-0.404	1.95e-21	29097
RAP2B	-0.404	2.18e-21	5912
LRFN4	-0.404	2.24e-21	78999
STAT6	-0.404	2.3e-21	6778
PLK3	-0.404	2.32e-21	1263
HGS	-0.405	1.46e-21	9146
ADAMTS14	-0.405	1.55e-21	140766
ABCC3	-0.405	1.62e-21	8714
SELPLG	-0.405	1.64e-21	6404
HES2	-0.405	1.65e-21	54626
C9orf150	-0.405	1.7e-21	NA
IFIT2	-0.405	1.78e-21	3433
DDA1	-0.405	1.79e-21	79016
OBFC2A	-0.406	1.14e-21	NA
LASP1	-0.406	1.18e-21	3927
GOLGA7B	-0.406	1.19e-21	401647
PDLIM7	-0.406	1.27e-21	9260
FUT3	-0.406	1.28e-21	2525
ADK	-0.406	1.36e-21	132
EMILIN2	-0.406	1.39e-21	84034
MCM5	-0.407	1.02e-21	4174
CDCP1	-0.407	1.03e-21	64866
C13orf33	-0.407	1.07e-21	NA
ECE1	-0.407	1.08e-21	1889
CEACAM6	-0.408	6.85e-22	4680
C1orf116	-0.408	7.17e-22	79098
C2orf58	-0.408	7.2e-22	NA
SUSD4	-0.408	8.33e-22	55061
C3orf37	-0.409	5.51e-22	NA
HLA-F	-0.409	5.51e-22	3134
RTN4R	-0.409	5.8e-22	65078
PLEC	-0.409	6.29e-22	5339
TCIRG1	-0.409	6.62e-22	10312
PABPC4	-0.41	4.14e-22	8761
FIBCD1	-0.41	4.29e-22	84929
FBXO32	-0.41	4.32e-22	114907
KCNJ2	-0.41	4.69e-22	3759
SAMD1	-0.41	4.8e-22	90378
LDLR	-0.411	3.32e-22	3949
SP110	-0.411	3.38e-22	3431
CORO1C	-0.411	3.43e-22	23603
PTK2B	-0.411	3.5e-22	2185
PNPLA6	-0.411	3.54e-22	10908
HAPLN3	-0.411	3.6e-22	145864
PLD4	-0.411	3.83e-22	122618
PON2	-0.411	3.97e-22	5445
GPR161	-0.411	3.98e-22	23432
ACTBL2	-0.411	4.09e-22	345651
PTP4A3	-0.412	3.07e-22	11156
CDH11	-0.412	3.13e-22	1009
DUSP6	-0.412	3.14e-22	1848
LCP1	-0.412	3.17e-22	3936
LOC100270710	-0.413	1.99e-22	NA
CLIP3	-0.413	2.06e-22	25999
ETV7	-0.413	2.08e-22	51513
UBE2L6	-0.413	2.16e-22	9246
MAFF	-0.413	2.18e-22	23764
MRPL14	-0.413	2.31e-22	64928
CSTB	-0.413	2.32e-22	1476
STAT5A	-0.413	2.46e-22	6776
TYROBP	-0.414	1.91e-22	7305
RARRES3	-0.415	1.26e-22	NA
STAT1	-0.415	1.28e-22	6772
SPATA12	-0.415	1.41e-22	353324
ASPHD1	-0.415	1.43e-22	253982
GAB2	-0.416	9.55e-23	9846
RNF220	-0.416	9.76e-23	55182
WDR55	-0.416	9.77e-23	54853
SMCR7	-0.416	1.04e-22	NA
GTF2IRD1	-0.417	7.05e-23	9569
GNLY	-0.417	7.3e-23	10578
IQGAP3	-0.417	7.36e-23	128239
ENTPD2	-0.417	7.49e-23	954
TUBA4A	-0.417	7.56e-23	7277
PFKFB3	-0.417	7.59e-23	5209
PTPRF	-0.418	5.45e-23	5792
INSL3	-0.418	5.5e-23	3640
PHF19	-0.418	6.08e-23	26147
S100A1	-0.418	6.29e-23	6271
LY6G6C	-0.418	6.32e-23	80740
MLXIPL	-0.418	6.61e-23	51085
CRB3	-0.419	4.13e-23	92359
FAM129B	-0.419	4.17e-23	NA
PSMB9	-0.419	4.32e-23	5698
C12orf53	-0.419	4.63e-23	NA
MNDA	-0.419	4.8e-23	4332
CSF2	-0.419	4.96e-23	1437
RND3	-0.419	5.27e-23	390
PPT1	-0.42	3.21e-23	5538
YWHAH	-0.42	3.32e-23	7533
PLAU	-0.42	3.5e-23	5328
CITED1	-0.42	3.58e-23	4435
TAF1D	-0.42	3.96e-23	79101
SLC7A4	-0.42	4.02e-23	6545
RAD23B	-0.421	2.9e-23	5887
ACTN1	-0.421	2.91e-23	87
ARSJ	-0.421	2.94e-23	79642
HPGDS	-0.421	3.09e-23	27306
ETNK2	-0.421	3.11e-23	55224
C17orf107	-0.421	3.12e-23	100130311
C2CD4B	-0.422	1.91e-23	388125
MBOAT2	-0.422	1.96e-23	129642
SYNPO	-0.422	2.14e-23	11346
PLEKHM2	-0.422	2.17e-23	23207
RHOG	-0.422	2.19e-23	391
PELI1	-0.422	2.31e-23	57162
EDEM1	-0.422	2.36e-23	9695
KHDRBS3	-0.423	1.5e-23	10656
MDK	-0.423	1.52e-23	4192
SPI1	-0.423	1.52e-23	6688
AKNA	-0.423	1.55e-23	80709
OLR1	-0.423	1.7e-23	4973
HPN	-0.423	1.76e-23	3249
TREM2	-0.424	1.15e-23	54209
LASS1	-0.424	1.16e-23	NA
RPS2	-0.424	1.19e-23	6187
LOC554202	-0.424	1.2e-23	NA
B2M	-0.424	1.32e-23	567
PACS2	-0.425	8.65e-24	23241
PRICKLE1	-0.425	9.02e-24	144165
CSDAP1	-0.425	9.1e-24	NA
NFKB2	-0.425	9.33e-24	4791
TNFRSF18	-0.426	6.57e-24	8784
C21orf63	-0.426	6.71e-24	NA
CLEC2B	-0.426	6.72e-24	9976
GTF2E2	-0.426	6.78e-24	2961
EHBP1L1	-0.426	7.11e-24	254102
LZTS2	-0.426	7.22e-24	84445
GAP43	-0.426	8.2e-24	2596
PABPC1	-0.427	5.48e-24	26986
GARS	-0.427	5.5e-24	NA
CIITA	-0.427	6.24e-24	4261
ME3	-0.427	6.26e-24	10873
C17orf96	-0.427	6.28e-24	NA
RASGEF1B	-0.428	4.03e-24	153020
SERINC2	-0.428	4.1e-24	347735
MIF4GD	-0.428	4.26e-24	57409
GNA15	-0.429	2.96e-24	2769
ANXA11	-0.429	3.28e-24	311
ITGB2	-0.429	3.31e-24	3689
EPHX3	-0.429	3.32e-24	79852
TGFA	-0.429	3.54e-24	7039
MARCO	-0.429	3.6e-24	8685
CACNG4	-0.429	3.71e-24	27092
PNPLA5	-0.429	3.72e-24	150379
ITGAM	-0.429	3.72e-24	3684
ELK1	-0.429	3.79e-24	2002
WBSCR26	-0.43	2.45e-24	NA
WBP2	-0.43	2.51e-24	23558
C1orf96	-0.43	2.52e-24	NA
C8orf73	-0.43	2.57e-24	NA
DHRS3	-0.43	2.58e-24	9249
ARPC1B	-0.43	2.75e-24	10095
RENBP	-0.43	2.76e-24	5973
HLA-DQB1	-0.43	2.87e-24	3119
ANKLE2	-0.431	2.13e-24	23141
CAST	-0.431	2.2e-24	831
SLC3A2	-0.432	1.33e-24	6520
STX3	-0.432	1.34e-24	6809
PMAIP1	-0.432	1.37e-24	5366
HLA-DOA	-0.432	1.39e-24	3111
FBXO2	-0.432	1.41e-24	26232
VAT1	-0.432	1.41e-24	10493
ITPRIPL2	-0.432	1.46e-24	162073
SNAP25	-0.432	1.66e-24	6616
RBM17	-0.433	1.04e-24	84991
RASGEF1A	-0.433	1.2e-24	221002
MAP1S	-0.433	1.23e-24	55201
GPX4	-0.434	7.58e-25	2879
TGM2	-0.434	7.71e-25	7052
NAMPT	-0.434	8.1e-25	10135
KCP	-0.434	8.54e-25	375616
ANXA2P1	-0.434	8.92e-25	303
RNF183	-0.434	8.97e-25	138065
STAM	-0.434	9.06e-25	8027
CST6	-0.434	9.25e-25	1474
PSTPIP2	-0.435	5.82e-25	9050
PRSS23	-0.435	6.53e-25	11098
ST8SIA4	-0.435	6.55e-25	7903
HLA-DPB1	-0.435	6.78e-25	3115
PEA15	-0.436	4.41e-25	8682
SHROOM4	-0.436	4.45e-25	57477
SPATS2L	-0.436	4.89e-25	26010
FMNL1	-0.436	5.2e-25	752
HCN4	-0.437	3.36e-25	10021
TMEM90A	-0.437	3.51e-25	NA
NXN	-0.437	3.85e-25	64359
G0S2	-0.437	4.2e-25	50486
PAPSS1	-0.437	4.24e-25	9061
SLC15A4	-0.438	2.5e-25	121260
HLA-DMA	-0.438	2.59e-25	3108
TAP1	-0.438	2.95e-25	6890
TEC	-0.438	2.97e-25	c("7006", "100124696")
CNFN	-0.438	3.21e-25	84518
RARG	-0.438	3.23e-25	5916
KRT15	-0.439	1.89e-25	3866
RASD2	-0.439	1.97e-25	23551
STK17B	-0.439	2.07e-25	9262
C16orf45	-0.439	2.21e-25	NA
CATSPER1	-0.439	2.39e-25	117144
SYN1	-0.44	1.45e-25	6853
CMTM3	-0.44	1.46e-25	123920
ITGB8	-0.44	1.53e-25	3696
MYO1G	-0.44	1.62e-25	64005
MRC2	-0.44	1.64e-25	9902
LMNA	-0.44	1.85e-25	4000
MYH14	-0.44	1.85e-25	79784
CLEC5A	-0.441	1.12e-25	23601
CARD11	-0.441	1.16e-25	84433
SRGAP2	-0.441	1.18e-25	23380
FYN	-0.441	1.22e-25	2534
RABGGTB	-0.441	1.32e-25	5876
AHNAK2	-0.441	1.35e-25	113146
FADD	-0.441	1.37e-25	8772
FCGR2A	-0.442	8.45e-26	2212
S100A4	-0.442	9.09e-26	6275
KIAA0226	-0.442	9.42e-26	NA
ADCY7	-0.443	6.17e-26	113
SH3BP2	-0.443	7.11e-26	6452
ATP6V1B2	-0.443	7.27e-26	526
ARF6	-0.444	4.79e-26	382
FAM129A	-0.444	4.94e-26	NA
ENO1	-0.444	4.94e-26	2023
HLA-G	-0.444	5.06e-26	3135
PPP1R13L	-0.444	5.53e-26	10848
KLHL2	-0.444	6.05e-26	11275
SYT1	-0.445	3.52e-26	6857
HCP5	-0.445	3.66e-26	10866
SC4MOL	-0.445	4.03e-26	NA
IDS	-0.445	4.31e-26	3423
SLC20A1	-0.446	2.86e-26	6574
PDZK1IP1	-0.446	2.9e-26	10158
CNN3	-0.446	3.08e-26	1266
CCNA1	-0.446	3.15e-26	8900
AHR	-0.446	3.21e-26	196
C1orf85	-0.446	3.29e-26	NA
MPZL2	-0.446	3.38e-26	10205
OSCAR	-0.447	2.19e-26	126014
C19orf22	-0.447	2.22e-26	NA
ARHGAP10	-0.447	2.24e-26	79658
CCL13	-0.447	2.32e-26	6357
HLA-DRB1	-0.448	1.56e-26	3123
OPTN	-0.449	1.22e-26	10133
PC	-0.449	1.3e-26	5091
RAB32	-0.449	1.34e-26	10981
AXIN1	-0.449	1.35e-26	8312
KCTD17	-0.449	1.35e-26	79734
CCT8	-0.449	1.39e-26	10694
PHYHIP	-0.449	1.42e-26	9796
DTX4	-0.449	1.47e-26	23220
SULT2B1	-0.45	8.33e-27	6820
CLIC1	-0.45	9.22e-27	1192
HPSE	-0.45	9.31e-27	10855
MAPKAPK2	-0.45	9.68e-27	9261
MAP4	-0.45	1.02e-26	4134
DLGAP4	-0.45	1.05e-26	22839
C9orf169	-0.452	4.87e-27	NA
BASP1	-0.452	5.34e-27	10409
C1orf106	-0.452	6.15e-27	NA
TGM1	-0.452	6.18e-27	7051
FHL3	-0.453	3.69e-27	2275
SLC22A4	-0.453	3.89e-27	6583
LENG9	-0.453	3.94e-27	94059
THOC5	-0.453	4.14e-27	8563
BAG3	-0.453	4.21e-27	9531
CDC42BPG	-0.453	4.36e-27	55561
LRG1	-0.453	4.63e-27	116844
SLPI	-0.454	2.6e-27	6590
SIAH2	-0.454	2.62e-27	6478
LOC374443	-0.454	2.78e-27	374443
ACP5	-0.454	2.8e-27	54
MUC21	-0.454	2.9e-27	394263
MFSD2B	-0.454	3e-27	388931
DUSP4	-0.454	3.3e-27	1846
TGFBR1	-0.454	3.4e-27	7046
EEF1B2	-0.455	1.94e-27	1933
ADCY8	-0.455	1.94e-27	114
TUBB6	-0.455	2.06e-27	84617
SYNGR2	-0.455	2.07e-27	9144
POLR3C	-0.455	2.19e-27	10623
SOX4	-0.455	2.28e-27	6659
RIPK2	-0.456	1.55e-27	8767
LOC400794	-0.456	1.56e-27	NA
ZMYND15	-0.456	1.68e-27	84225
HLA-H	-0.456	1.83e-27	3136
GRAMD1A	-0.456	1.89e-27	57655
IGFBP6	-0.457	1.11e-27	3489
CHEK2	-0.457	1.2e-27	11200
NPC1	-0.457	1.21e-27	4864
FADS3	-0.457	1.22e-27	3995
ESPN	-0.457	1.23e-27	83715
GLRX3	-0.457	1.26e-27	10539
AVPI1	-0.457	1.3e-27	60370
TMEM184A	-0.457	1.31e-27	202915
CD151	-0.457	1.35e-27	977
PAFAH1B3	-0.458	8.45e-28	5050
PDE9A	-0.458	8.84e-28	5152
ARPC5L	-0.458	1.01e-27	81873
TMEM41A	-0.459	6.62e-28	90407
TNC	-0.459	6.64e-28	3371
EMP3	-0.459	7.07e-28	2014
SLC27A6	-0.459	7.43e-28	28965
BAT3	-0.459	7.79e-28	NA
RAC2	-0.46	4.77e-28	5880
PHLDA3	-0.46	5.87e-28	23612
FTH1	-0.461	3.32e-28	2495
EMP2	-0.461	3.63e-28	2013
RDH5	-0.461	3.91e-28	5959
AK3L1	-0.461	4.06e-28	NA
SYTL1	-0.461	4.18e-28	84958
CDC42EP3	-0.461	4.27e-28	10602
NRIP1	-0.462	2.68e-28	8204
ALOX5AP	-0.462	2.92e-28	241
FAM20A	-0.462	3.2e-28	54757
CCND3	-0.463	2.07e-28	896
NAB2	-0.463	2.09e-28	4665
CELF4	-0.463	2.37e-28	56853
MYO1D	-0.464	1.41e-28	4642
RPS4X	-0.464	1.46e-28	6191
PLRG1	-0.464	1.5e-28	5356
HLA-C	-0.464	1.61e-28	3107
KANK2	-0.464	1.73e-28	25959
TMEM53	-0.465	1.02e-28	79639
VASP	-0.465	1.02e-28	7408
BBC3	-0.466	7.56e-29	27113
SYNGR3	-0.466	7.75e-29	9143
KIAA0284	-0.466	7.82e-29	NA
IL1RAP	-0.466	9.26e-29	3556
MED15	-0.466	9.44e-29	51586
SCEL	-0.466	9.47e-29	8796
HLA-DPA1	-0.467	5.78e-29	3113
DPP4	-0.467	6.52e-29	1803
RNF149	-0.467	7.18e-29	284996
LGALS1	-0.468	5.14e-29	3956
C2CD4A	-0.468	5.24e-29	145741
DEPDC1B	-0.469	3.02e-29	55789
MICAL2	-0.469	3.3e-29	9645
HSD3B7	-0.469	3.54e-29	80270
LPAR5	-0.469	3.73e-29	57121
VWA5A	-0.469	3.86e-29	4013
HLA-A	-0.47	2.16e-29	3105
CLEC16A	-0.47	2.82e-29	23274
MFGE8	-0.471	1.67e-29	4240
HLA-DQB2	-0.471	1.76e-29	3120
LLGL1	-0.471	1.81e-29	3996
GRHL3	-0.471	1.9e-29	57822
ZYX	-0.471	2.03e-29	7791
MAP7D1	-0.471	2.09e-29	55700
CLDN7	-0.472	1.16e-29	1366
RASGRF1	-0.472	1.33e-29	5923
EHD2	-0.472	1.54e-29	30846
SPOCK2	-0.473	8.73e-30	9806
ACOT9	-0.473	8.89e-30	23597
NOD1	-0.473	1.04e-29	10392
CBX3	-0.474	6.28e-30	11335
AMOT	-0.474	6.62e-30	154796
PLSCR3	-0.474	6.79e-30	57048
ADORA1	-0.475	4.86e-30	134
VARS	-0.475	5.42e-30	NA
CD55	-0.476	3.36e-30	1604
CDH3	-0.476	3.36e-30	1001
POU2F3	-0.476	3.89e-30	25833
C1orf187	-0.477	2.51e-30	NA
BAIAP3	-0.477	2.9e-30	8938
NFKBIE	-0.477	2.95e-30	4794
PAM	-0.477	2.97e-30	5066
CDSN	-0.477	3.08e-30	1041
TMEM117	-0.478	2e-30	84216
MAP2	-0.478	2.01e-30	4133
NR2C2AP	-0.478	2.14e-30	126382
GSN	-0.478	2.35e-30	2934
PHLDA2	-0.479	1.28e-30	7262
MSN	-0.479	1.39e-30	4478
TMC8	-0.479	1.46e-30	147138
ITPKC	-0.48	9.51e-31	80271
GOLT1A	-0.48	9.58e-31	127845
CLDN1	-0.48	9.79e-31	9076
CKLF	-0.48	9.96e-31	51192
MGAT3	-0.48	1.26e-30	4248
CFB	-0.481	6.75e-31	629
KRT19	-0.481	7.13e-31	3880
STRA6	-0.481	7.76e-31	64220
NFE2L3	-0.481	9.18e-31	9603
KLC3	-0.482	4.95e-31	147700
P2RY6	-0.482	5.21e-31	5031
TMSL3	-0.482	5.74e-31	NA
CREB5	-0.482	6.57e-31	9586
SRCIN1	-0.483	3.96e-31	80725
IL17RD	-0.484	2.63e-31	54756
DHDH	-0.484	2.63e-31	27294
CD276	-0.484	2.74e-31	80381
HLA-DRA	-0.484	2.83e-31	3122
C9orf16	-0.484	3.23e-31	79095
C5orf62	-0.485	1.85e-31	NA
ICAM5	-0.485	1.86e-31	7087
KLK10	-0.485	1.98e-31	5655
PLA2G16	-0.485	2.1e-31	NA
BCL2L1	-0.485	2.35e-31	598
AKIRIN2	-0.485	2.54e-31	55122
SEL1L3	-0.486	1.41e-31	23231
CBR3	-0.486	1.64e-31	874
DUSP23	-0.487	1.1e-31	54935
IL1RN	-0.488	7.28e-32	3557
GPR153	-0.488	9.14e-32	387509
ITGB4	-0.488	9.63e-32	3691
IER5L	-0.489	5.21e-32	389792
CLDN10	-0.489	5.27e-32	9071
SCNN1A	-0.489	5.47e-32	6337
CD74	-0.489	5.78e-32	972
CCDC109B	-0.489	6.11e-32	NA
NTAN1	-0.489	6.64e-32	123803
SPHK1	-0.49	3.94e-32	8877
KLK7	-0.49	4.84e-32	5650
PHF13	-0.491	2.67e-32	148479
PKP2	-0.491	3.17e-32	5318
SFTPB	-0.491	3.36e-32	6439
C19orf33	-0.491	3.38e-32	64073
EPHB3	-0.492	2.04e-32	2049
ST6GALNAC5	-0.492	2.25e-32	81849
PPP1R1B	-0.492	2.27e-32	84152
FAM178B	-0.492	2.31e-32	51252
WNT10A	-0.492	2.35e-32	80326
C1orf38	-0.492	2.47e-32	NA
APOL1	-0.493	1.43e-32	8542
C3	-0.493	1.51e-32	718
LIPH	-0.493	1.64e-32	200879
SLC1A5	-0.493	1.72e-32	6510
ATP1B3	-0.493	1.73e-32	483
PDK3	-0.493	1.8e-32	5165
ZNF581	-0.494	1.03e-32	51545
TMEM43	-0.494	1.09e-32	79188
PDE5A	-0.494	1.11e-32	8654
PLEKHA4	-0.494	1.25e-32	57664
MUC1	-0.495	7.23e-33	4582
CTSA	-0.495	7.39e-33	5476
ARHGAP23	-0.495	7.92e-33	57636
DVL1	-0.495	7.95e-33	1855
FAM43A	-0.495	8.42e-33	131583
LYNX1	-0.496	5.42e-33	66004
DDB2	-0.497	3.5e-33	1643
APOL2	-0.497	3.69e-33	23780
ERBB3	-0.497	4.19e-33	2065
PLAUR	-0.497	4.75e-33	5329
BTG3	-0.498	2.6e-33	10950
ARRDC2	-0.498	2.73e-33	27106
SH3BGRL3	-0.499	2e-33	83442
DSC2	-0.499	2.47e-33	1824
C6orf1	-0.5	1.62e-33	NA
HMGA1	-0.501	9.91e-34	3159
CC2D1B	-0.502	6.67e-34	200014
MAMLD1	-0.502	6.93e-34	10046
TNFRSF21	-0.502	7.02e-34	27242
ANXA2P2	-0.502	7.76e-34	304
PRSS22	-0.502	7.95e-34	64063
PTPLA	-0.502	8.02e-34	NA
SYTL5	-0.502	8.39e-34	94122
UNC5CL	-0.503	4.86e-34	222643
FRMD5	-0.503	5.15e-34	84978
ALOX15B	-0.503	5.15e-34	247
VASN	-0.504	3.26e-34	114990
SEPT9	-0.504	3.85e-34	NA
S100A10	-0.504	4.5e-34	6281
C19orf52	-0.505	2.39e-34	NA
DRAM1	-0.505	2.4e-34	55332
KLF16	-0.505	2.49e-34	83855
CCM2	-0.505	2.77e-34	83605
SNX8	-0.505	3.02e-34	29886
TUBB3	-0.506	1.77e-34	10381
CTXN1	-0.506	1.87e-34	404217
GLS2	-0.507	1.19e-34	27165
RSPO4	-0.507	1.26e-34	343637
RABGGTA	-0.508	8.36e-35	5875
ELF4	-0.508	9.76e-35	2000
LSR	-0.508	1.04e-34	51599
FLNA	-0.509	5.69e-35	2316
TMSB10	-0.509	6.53e-35	9168
PLP2	-0.509	6.64e-35	5355
ZFYVE19	-0.509	6.93e-35	84936
CTSC	-0.509	7.58e-35	1075
BNC1	-0.51	4.71e-35	646
UBE2E2	-0.51	4.95e-35	7325
SNAPC2	-0.511	2.95e-35	6618
TNFRSF1A	-0.511	3.77e-35	7132
COL8A2	-0.512	2.04e-35	1296
MST1R	-0.512	2.15e-35	4486
LYN	-0.512	2.41e-35	4067
RTKN	-0.513	1.55e-35	6242
SDC3	-0.513	1.88e-35	9672
NGEF	-0.514	1e-35	25791
RRP9	-0.514	1.35e-35	9136
PERP	-0.515	7.84e-36	64065
IFIT5	-0.515	8.79e-36	24138
CTSD	-0.516	6.12e-36	1509
TMEM92	-0.517	3.69e-36	162461
RYR1	-0.517	3.87e-36	6261
ARAP1	-0.517	3.95e-36	116985
BHLHE40	-0.517	4.22e-36	8553
DBC1	-0.518	2.84e-36	NA
HLA-B	-0.518	2.97e-36	3106
SH3BP1	-0.519	2.1e-36	23616
TMEM79	-0.519	2.26e-36	84283
ALOX5	-0.52	1.31e-36	240
INF2	-0.52	1.38e-36	64423
ELF3	-0.521	7.76e-37	1999
C6orf168	-0.521	7.87e-37	NA
TFAP2C	-0.522	6.94e-37	7022
UBQLN4	-0.522	7.38e-37	56893
SLCO4A1	-0.523	4.19e-37	28231
CYTSB	-0.523	4.3e-37	NA
DUSP5	-0.523	4.39e-37	1847
EBI3	-0.524	2.74e-37	10148
STBD1	-0.524	3.14e-37	8987
JAK3	-0.525	1.83e-37	3718
TMPRSS4	-0.526	1.45e-37	56649
KRT80	-0.526	1.48e-37	144501
OCIAD2	-0.526	1.71e-37	132299
PALM	-0.526	1.73e-37	5064
FLJ42709	-0.527	9.8e-38	NA
NPC2	-0.528	6.3e-38	10577
SCD	-0.528	6.83e-38	6319
ITGA3	-0.528	7.66e-38	3675
ANXA1	-0.528	7.98e-38	301
GALE	-0.529	4.99e-38	2582
CDC42EP5	-0.529	5.27e-38	148170
CAMK2N1	-0.53	2.88e-38	55450
RUNX2	-0.53	3.16e-38	860
CYP1B1	-0.532	1.31e-38	1545
FAM89B	-0.532	1.33e-38	23625
RNF144A	-0.533	1.11e-38	9781
GJB3	-0.533	1.17e-38	2707
TMPRSS6	-0.535	4.94e-39	164656
LEMD1	-0.535	5.03e-39	93273
PLEKHA6	-0.535	5.27e-39	22874
RIN1	-0.536	3.53e-39	9610
ANXA2	-0.536	3.89e-39	302
MTMR11	-0.537	2.15e-39	10903
QSOX1	-0.537	2.38e-39	5768
GABRB2	-0.537	2.42e-39	2561
TIMP1	-0.538	1.45e-39	7076
CTTN	-0.539	1.03e-39	2017
UBE2I	-0.539	1.05e-39	7329
LCMT1	-0.539	1.06e-39	51451
TNFRSF12A	-0.541	4.33e-40	51330
CD58	-0.541	4.41e-40	965
SFN	-0.541	5.37e-40	2810
CD164L2	-0.543	1.87e-40	388611
PI4K2A	-0.543	1.87e-40	55361
FCHO1	-0.543	2.59e-40	23149
MAPKAPK3	-0.544	1.26e-40	7867
S100A16	-0.544	1.33e-40	140576
CDC42EP1	-0.544	1.43e-40	11135
TM7SF4	-0.544	1.51e-40	NA
BEAN	-0.544	1.55e-40	NA
GRB7	-0.545	8.63e-41	2886
GDF15	-0.545	1.17e-40	9518
GBP2	-0.545	1.18e-40	2634
MACC1	-0.545	1.21e-40	346389
C1orf170	-0.547	4.02e-41	NA
LCN2	-0.547	4.88e-41	3934
EPHA10	-0.547	5.3e-41	284656
WTIP	-0.549	1.84e-41	126374
GATAD2A	-0.55	1.41e-41	54815
LOC100126784	-0.55	1.49e-41	100126784
ICAM1	-0.55	1.67e-41	3383
RCC2	-0.551	7.68e-42	55920
LAMB3	-0.551	8.47e-42	3914
TAX1BP3	-0.552	5.47e-42	30851
RELB	-0.553	4.5e-42	5971
STAC	-0.553	4.79e-42	6769
BCAS4	-0.555	1.73e-42	55653
KCNQ3	-0.555	1.95e-42	3786
FLJ23867	-0.555	2.23e-42	NA
PTPRE	-0.556	1.27e-42	5791
SDC4	-0.557	6.89e-43	6385
TTL	-0.557	8.9e-43	150465
CSDA	-0.557	9.32e-43	NA
FSTL3	-0.558	4.89e-43	10272
ST14	-0.558	6.18e-43	6768
PTPRU	-0.559	2.9e-43	10076
ACOT7	-0.559	3.06e-43	11332
DOK7	-0.559	3.19e-43	285489
CHI3L1	-0.559	3.67e-43	1116
TAGLN2	-0.56	2.79e-43	8407
LAD1	-0.561	1.59e-43	3898
TPD52L1	-0.561	1.87e-43	7164
ABTB2	-0.561	1.89e-43	25841
ENDOD1	-0.562	1.12e-43	23052
CXCL17	-0.563	5.8e-44	284340
S100A6	-0.563	5.95e-44	6277
IRF5	-0.563	6.02e-44	3663
PROS1	-0.564	3.88e-44	5627
PSMB8	-0.564	4.61e-44	5696
PKM2	-0.564	5.04e-44	NA
SLC34A2	-0.567	1.01e-44	10568
TOMM34	-0.569	4.6e-45	10953
FAM20C	-0.572	1.41e-45	56975
MAD2L2	-0.573	8.16e-46	10459
S100A11	-0.573	1.13e-45	6282
FAM176A	-0.576	2.51e-46	NA
SPTBN2	-0.579	6e-47	6712
MET	-0.579	7.3e-47	4233
LY6E	-0.579	8.05e-47	4061
TBC1D2	-0.58	3.82e-47	55357
TACSTD2	-0.582	1.55e-47	4070
LGALS3	-0.584	7.95e-48	3958
TRIM47	-0.585	5.54e-48	91107
CXCL16	-0.585	5.64e-48	58191
ATIC	-0.586	2.38e-48	471
SYT12	-0.586	2.81e-48	91683
NPTXR	-0.587	1.84e-48	23467
UPP1	-0.59	4.76e-49	7378
B3GNT3	-0.59	4.84e-49	10331
SLC35F2	-0.593	9.78e-50	54733
SERPINA1	-0.594	8.04e-50	5265
FN1	-0.595	4.27e-50	2335
TMC6	-0.596	3.46e-50	11322
SCN1B	-0.597	1.71e-50	6324
ABR	-0.597	2.03e-50	29
MGAT4B	-0.598	9.37e-51	11282
IL4R	-0.598	1.39e-50	3566
CTSH	-0.599	8.02e-51	1512
KCNN4	-0.601	2.57e-51	3783
SFXN3	-0.602	1.55e-51	81855
PVRL4	-0.602	2.01e-51	NA
CYP2S1	-0.604	7.18e-52	29785
SPINT1	-0.605	3.5e-52	6692
PDLIM4	-0.605	3.91e-52	8572
ALDH3B1	-0.606	2.02e-52	221
GGCT	-0.606	2.17e-52	79017
BID	-0.606	2.27e-52	637
MVP	-0.606	2.33e-52	9961
RUNX1	-0.607	1.31e-52	861
FLII	-0.61	3.13e-53	2314
MAP3K6	-0.616	1.35e-54	9064
PLCD3	-0.632	3.6e-58	113026
PLEKHN1	-0.635	6.71e-59	84069
ETHE1	-0.656	7.92e-64	23474
C11orf80	-0.679	5.08e-70	79703

## Sheet: Table S3
Supplementary Table 3. GO enrichment detailed results.
ONTOLOGY	ID	Description	GeneRatio	BgRatio	pvalue	p.adjust	qvalue	geneID	Count
BP	GO:0006590	thyroid hormone generation	10/1461	17/18670	9.75238e-08	0.000305128	0.000270368	TPO/DIO1/PAX8/FOXE1/DUOXA2/IYD/DIO2/DUOX2/DUOX1/HPN	10
BP	GO:0042403	thyroid hormone metabolic process	11/1461	21/18670	1.09823e-07	0.000305128	0.000270368	TPO/DIO1/PAX8/TG/FOXE1/DUOXA2/IYD/DIO2/DUOX2/DUOX1/HPN	11
BP	GO:0034329	cell junction assembly	63/1461	409/18670	1.59336e-07	0.000305128	0.000270368	SHANK2/BCL2/FLRT1/LINGO2/MARVELD2/CNTN5/WNT4/PCLO/GABRB3/CORO2B/VEGFA/FBF1/ANK2/ESAM/UGT8/OPHN1/SLITRK5/GPM6A/GJB1/TNS1/MAGI2/LIMCH1/LRRTM2/RAPGEF2/SFRP1/KDR/TLN2/BHLHB9/GPM6B/CDHR3/MEF2C/RUNX1/FN1/SPTBN2/SDC4/RCC2/LAMB3/CTTN/GABRB2/SH3BP1/FLNA/LSR/S100A10/DVL1/EPHB3/PKP2/ITGB4/CLDN1/CDH3/SPOCK2/IL1RAP/VASP/CD151/ARF6/GAP43/ACTN1/CRB3/CDH11/CORO1C/PTK2B/PLEC/LRFN4/DST	63
BP	GO:0007015	actin filament organization	61/1461	400/18670	3.56168e-07	0.000511547	0.000453271	SORBS2/HSP90B1/LMOD1/BCL2/MAGEL2/PRKCE/WASF3/PROX1/WNT4/IQGAP2/CGNL1/CORO2B/NEB/DSTN/BBS4/INPPL1/RHOBTB1/ARHGAP28/LIMCH1/SFRP1/RND2/PDLIM3/SPTBN1/RDX/FHOD3/CDC42EP2/TACSTD2/SPTBN2/MET/MAD2L2/SDC4/ICAM1/CDC42EP1/CTTN/CDC42EP5/SH3BP1/ARAP1/FLNA/TMSB10/S100A10/GSN/ZYX/MICAL2/VASP/EMP2/CDC42EP3/RAC2/ARPC5L/ESPN/TGFBR1/ARF6/SHROOM4/PSTPIP2/ARPC1B/SYNPO/RHOG/ACTN1/RND3/LCP1/CORO1C/PTK2B	61
BP	GO:0032970	regulation of actin filament-based process	59/1461	388/18670	6.09037e-07	0.000699784	0.000620064	LMOD1/MAGEL2/PRKCE/PROX1/WNT4/IQGAP2/CORO2B/NEB/ANK2/DSTN/KCNE3/BBS4/RYR2/RHOBTB1/ODAM/ARHGAP28/ATP1A1/EPHA5/LIMCH1/SFRP1/RND2/GPM6B/SPTBN1/RDX/FHOD3/CDC42EP2/MEF2C/TACSTD2/SPTBN2/MET/SDC4/ICAM1/CDC42EP1/CTTN/CDC42EP5/SH3BP1/ARAP1/FLNA/TMSB10/S100A10/DSC2/PKP2/GSN/PAM/ADORA1/GRHL3/VASP/CDC42EP3/ARPC5L/TGFBR1/ARF6/HCN4/ARPC1B/MDK/SYNPO/RHOG/RND3/PTK2B/KCNJ2	59
BP	GO:1990778	protein localization to cell periphery	50/1461	319/18670	1.77902e-06	0.00170341	0.00150936	GRIN2C/DPP6/ATP2C2/PRKCE/GNAI1/MAPK10/RILPL1/ANK2/ANK3/LRRC7/GORASP1/CNST/AR/DLG2/KCNIP3/NUMB/RILPL2/RAPGEF2/LRP6/KCNIP4/SPTBN1/RDX/ADAM22/PTPN9/FAM126B/LGALS3/STAC/ANXA2/ITGA3/PALM/RTKN/TNFRSF1A/FLNA/S100A10/ANXA2P2/ATP1B3/PKP2/BCL2L1/EHD2/EMP2/OPTN/ARF6/STX3/SNAP25/CACNG4/PACS2/TREM2/RHOG/CRB3/CLIP3	50
BP	GO:0001655	urogenital system development	51/1461	330/18670	2.14835e-06	0.00176318	0.00156232	IFT140/BCL2/PAX8/PGF/CYP7B1/PROX1/WNT4/RARB/ID4/IFT88/VEGFA/FOXJ1/WFS1/AR/NFIA/AGTR1/HSPB11/MAGI2/PDGFD/SFRP1/GZF1/FKBP4/CYP26B1/GLI3/MEF2C/CD24/ID3/TMED10/FGFR2/RGN/SMO/CTSH/TACSTD2/FSTL3/SDC4/ITGA3/ANXA1/ALOX15B/EPHB3/ITGB4/STRA6/KANK2/TNC/SOX4/TGFBR1/BASP1/FADD/RARG/LZTS2/CITED1/STAT1	51
BP	GO:0007044	cell-substrate junction assembly	22/1461	97/18670	4.42515e-06	0.00207326	0.00183708	BCL2/WNT4/CORO2B/VEGFA/TNS1/LIMCH1/SFRP1/KDR/GPM6B/FN1/SDC4/RCC2/LAMB3/CTTN/S100A10/ITGB4/CD151/ACTN1/CORO1C/PTK2B/PLEC/DST	22
BP	GO:0150115	cell-substrate junction organization	22/1461	97/18670	4.42515e-06	0.00207326	0.00183708	BCL2/WNT4/CORO2B/VEGFA/TNS1/LIMCH1/SFRP1/KDR/GPM6B/FN1/SDC4/RCC2/LAMB3/CTTN/S100A10/ITGB4/CD151/ACTN1/CORO1C/PTK2B/PLEC/DST	22
BP	GO:0002478	antigen processing and presentation of exogenous peptide antigen	32/1461	175/18670	5.21482e-06	0.00207326	0.00183708	CALR/PDIA3/CANX/CD36/DYNC1I1/KIF5A/TRAF6/LGMN/SPTBN2/PSMB8/HLA-B/CTSD/CD74/HLA-DRA/HLA-DQB2/HLA-A/HLA-DPA1/HLA-C/HLA-H/HLA-DRB1/HLA-G/HLA-DMA/TAP1/HLA-DPB1/HLA-DOA/HLA-DQB1/B2M/PSMB9/HLA-F/HLA-DQA1/NCF2/CTSS	32
BP	GO:0002483	antigen processing and presentation of endogenous peptide antigen	8/1461	15/18670	5.38877e-06	0.00207326	0.00183708	HLA-B/HLA-A/HLA-C/HLA-H/HLA-G/TAP1/B2M/HLA-F	8
BP	GO:0019885	antigen processing and presentation of endogenous peptide antigen via MHC class I	8/1461	15/18670	5.38877e-06	0.00207326	0.00183708	HLA-B/HLA-A/HLA-C/HLA-H/HLA-G/TAP1/B2M/HLA-F	8
BP	GO:0060333	interferon-gamma-mediated signaling pathway	21/1461	91/18670	5.42387e-06	0.00207326	0.00183708	MID1/NCAM1/IRF5/ICAM1/GBP2/HLA-B/HLA-DRA/HLA-DQB2/HLA-A/HLA-DPA1/HLA-C/HLA-H/HLA-DRB1/HLA-G/HLA-DPB1/HLA-DQB1/CIITA/B2M/STAT1/HLA-F/HLA-DQA1	21
BP	GO:0043406	positive regulation of MAP kinase activity	42/1461	260/18670	5.42565e-06	0.00207326	0.00183708	KIT/FZD8/DUSP19/GHR/MAPK10/VEGFA/CHRNA7/SAMD5/TDGF1/MAP2K6/EDN3/MAP3K4/PDGFD/FZD4/TRAF6/FLT1/CARTPT/ITGA1/NEK10/CD24/MAP3K6/CXCL17/TPD52L1/GDF15/MAPKAPK3/DUSP5/MST1R/PDE5A/CD74/ADORA1/NOD1/AVPI1/RIPK2/TGFBR1/MAPKAPK2/PEA15/TGFA/IQGAP3/DUSP6/PTK2B/MDFIC/MUC20	42
BP	GO:0072659	protein localization to plasma membrane	42/1461	260/18670	5.42565e-06	0.00207326	0.00183708	DPP6/ATP2C2/PRKCE/RILPL1/ANK2/ANK3/LRRC7/GORASP1/CNST/AR/KCNIP3/NUMB/RILPL2/RAPGEF2/LRP6/KCNIP4/SPTBN1/RDX/PTPN9/FAM126B/LGALS3/STAC/ANXA2/ITGA3/PALM/TNFRSF1A/FLNA/S100A10/ANXA2P2/ATP1B3/PKP2/BCL2L1/EHD2/EMP2/OPTN/ARF6/STX3/PACS2/TREM2/RHOG/CRB3/CLIP3	42
BP	GO:0019882	antigen processing and presentation	38/1461	226/18670	5.7741e-06	0.00207326	0.00183708	CALR/PDIA3/CANX/CD36/DYNC1I1/KIF5A/TRAF6/LGMN/CTSH/SPTBN2/PSMB8/RELB/ICAM1/HLA-B/CTSD/CD74/HLA-DRA/NOD1/HLA-DQB2/HLA-A/HLA-DPA1/HLA-C/HLA-H/RAB32/HLA-DRB1/HLA-G/HLA-DMA/TAP1/HLA-DPB1/HLA-DOA/HLA-DQB1/TREM2/B2M/PSMB9/HLA-F/HLA-DQA1/NCF2/CTSS	38
BP	GO:0048002	antigen processing and presentation of peptide antigen	33/1461	189/18670	1.03692e-05	0.00350418	0.00310498	CALR/PDIA3/CANX/CD36/DYNC1I1/KIF5A/TRAF6/LGMN/SPTBN2/PSMB8/HLA-B/CTSD/CD74/HLA-DRA/HLA-DQB2/HLA-A/HLA-DPA1/HLA-C/HLA-H/HLA-DRB1/HLA-G/HLA-DMA/TAP1/HLA-DPB1/HLA-DOA/HLA-DQB1/TREM2/B2M/PSMB9/HLA-F/HLA-DQA1/NCF2/CTSS	33
BP	GO:0019884	antigen processing and presentation of exogenous antigen	32/1461	182/18670	1.21136e-05	0.00374134	0.00331513	CALR/PDIA3/CANX/CD36/DYNC1I1/KIF5A/TRAF6/LGMN/SPTBN2/PSMB8/HLA-B/CTSD/CD74/HLA-DRA/HLA-DQB2/HLA-A/HLA-DPA1/HLA-C/HLA-H/HLA-DRB1/HLA-G/HLA-DMA/TAP1/HLA-DPB1/HLA-DOA/HLA-DQB1/B2M/PSMB9/HLA-F/HLA-DQA1/NCF2/CTSS	32
BP	GO:0018958	phenol-containing compound metabolic process	22/1461	103/18670	1.23735e-05	0.00374134	0.00331513	TPO/DIO1/BCL2/PAX8/TG/SULT1A2/FOXE1/LRTOMT/DUOXA2/ABAT/IYD/DIO2/RAPGEF2/OCA2/DUOX2/DUOX1/DBH/CDH3/ITGB2/ITGAM/HPN/CITED1	22
BP	GO:0120032	regulation of plasma membrane bounded cell projection assembly	31/1461	175/18670	1.41237e-05	0.00387171	0.00343064	KIT/IFT140/CENPJ/IFT88/GPM6A/BBS4/TAPT1/HAP1/VDAC3/RAP1GAP/RDX/HDAC4/CDC42EP2/MYO10/TACSTD2/RCC2/ICAM1/CDC42EP1/CDC42EP5/PALM/ARAP1/CDC42EP3/RAC2/ESPN/TGFBR1/MAP4/KCTD17/ARF6/GAP43/RHOG/CORO1C	31
BP	GO:0032956	regulation of actin cytoskeleton organization	50/1461	343/18670	1.41525e-05	0.00387171	0.00343064	LMOD1/MAGEL2/PRKCE/PROX1/WNT4/IQGAP2/CORO2B/NEB/DSTN/BBS4/RHOBTB1/ODAM/ARHGAP28/EPHA5/LIMCH1/SFRP1/RND2/GPM6B/SPTBN1/RDX/FHOD3/CDC42EP2/MEF2C/TACSTD2/SPTBN2/MET/SDC4/ICAM1/CDC42EP1/CTTN/CDC42EP5/SH3BP1/ARAP1/FLNA/TMSB10/S100A10/GSN/PAM/GRHL3/VASP/CDC42EP3/ARPC5L/TGFBR1/ARF6/ARPC1B/MDK/SYNPO/RHOG/RND3/PTK2B	50
BP	GO:0070661	leukocyte proliferation	45/1461	298/18670	1.53015e-05	0.00399579	0.00354058	KIT/BCL2/WNT4/FOXJ1/PRKCQ/ENPP3/SH3RF1/RAG2/RC3H1/TRAF6/GLMN/MPL/MEF2C/CD24/HHEX/NPR3/LGALS3/SDC4/ANXA1/JAK3/EBI3/LYN/ELF4/TNFRSF21/PDE5A/CD74/CD276/MSN/CD55/HLA-DPA1/CCND3/RAC2/CD151/RIPK2/AHR/HLA-G/CARD11/FYN/FADD/HLA-DPB1/TREM2/PELI1/MNDA/TYROBP/TCIRG1	45
BP	GO:0097501	stress response to metal ion	8/1461	17/18670	1.76553e-05	0.00426945	0.00378307	MT1F/MT1G/MT1H/HSPA5/MT1M/MT1E/MT1DP/MT1X	8
BP	GO:0060491	regulation of cell projection assembly	31/1461	177/18670	1.78358e-05	0.00426945	0.00378307	KIT/IFT140/CENPJ/IFT88/GPM6A/BBS4/TAPT1/HAP1/VDAC3/RAP1GAP/RDX/HDAC4/CDC42EP2/MYO10/TACSTD2/RCC2/ICAM1/CDC42EP1/CDC42EP5/PALM/ARAP1/CDC42EP3/RAC2/ESPN/TGFBR1/MAP4/KCTD17/ARF6/GAP43/RHOG/CORO1C	31
BP	GO:0019883	antigen processing and presentation of endogenous antigen	9/1461	22/18670	2.09121e-05	0.0048056	0.00425814	HLA-B/CD74/HLA-A/HLA-C/HLA-H/HLA-G/TAP1/B2M/HLA-F	9
BP	GO:0042445	hormone metabolic process	37/1461	232/18670	2.5667e-05	0.00567141	0.00502532	TPO/DIO1/GHR/PAX8/WNT4/TG/CYP46A1/RDH11/CYP27B1/FDX1/PPARGC1A/FOXE1/ALDH9A1/HSD17B6/DUOXA2/HSD17B3/TRERF1/IYD/ATP1A1/HSD17B4/DIO2/CRABP1/HSD11B2/BCO2/DUOX2/CYP26B1/DUOX1/SCPEP1/ALDH1A1/CYP2S1/CYP1B1/RDH5/DHRS3/HPN/YWHAH/ECE1/ALDH1A3	37
BP	GO:0035148	tube formation	27/1461	148/18670	2.88612e-05	0.00614101	0.00544143	PRKACB/PAX8/PROX1/WNT4/TCTN1/LRP2/VEGFA/SALL4/BBS4/TRAF6/LRP6/SFRP1/DICER1/GLMN/MKS1/CC2D2A/FGFR2/SPINT1/ST14/SDC4/DVL1/GRHL3/VASP/SOX4/RARG/TGM2/PRICKLE1	27
BP	GO:0034341	response to interferon-gamma	33/1461	199/18670	3.09663e-05	0.0063341	0.00561251	AQP4/MID1/CYP27B1/TDGF1/CALCOCO2/CDC42EP2/NCAM1/CXCL16/IRF5/ICAM1/GBP2/CD58/HLA-B/HLA-DRA/CLDN1/GSN/HLA-DQB2/ZYX/HLA-A/HLA-DPA1/HLA-C/HLA-H/HLA-DRB1/CCL13/HLA-G/HLA-DPB1/HLA-DQB1/CIITA/B2M/CITED1/STAT1/HLA-F/HLA-DQA1	33
BP	GO:0071294	cellular response to zinc ion	9/1461	23/18670	3.19737e-05	0.0063341	0.00561251	MT1F/MT1G/MT1H/MT1M/MT1E/MT1DP/ZNF658/KCNK3/MT1X	9
BP	GO:0031589	cell-substrate adhesion	50/1461	354/18670	3.32067e-05	0.00635909	0.00563466	BCL2/CALR/TECTA/PRKCE/WNT4/CORO2B/VEGFA/SNED1/CD36/RADIL/LIMCH1/FZD4/SFRP1/KDR/LAMB4/ITGA1/GCNT2/GPM6B/RAB1A/SMOC2/TNN/FN1/TACSTD2/SDC4/RCC2/LAMB3/TNFRSF12A/CTTN/ITGA3/FLNA/S100A10/EPHB3/ITGB4/SRCIN1/SPOCK2/ZYX/LGALS1/EMP2/RAC2/HPSE/SRGAP2/MYO1G/ITGB2/MDK/ACTN1/PLAU/CORO1C/PTK2B/CEACAM6/EMILIN2	50
BP	GO:0045785	positive regulation of cell adhesion	55/1461	403/18670	3.65126e-05	0.00662745	0.00587245	CALR/PRKCE/RAG1/WNT4/VEGFA/CYTH3/PRKCQ/ANK3/CD36/TRAF6/SFRP1/KDR/FOXA2/GCNT2/GLI3/SMOC2/CD24/MYO10/RUNX1/IL4R/FN1/PTPRU/FSTL3/SDC4/ICAM1/ITGA3/ANXA1/JAK3/EBI3/LYN/FLNA/S100A10/FRMD5/CD74/CD276/CD55/SPOCK2/LGALS1/HLA-DPA1/DPP4/EMP2/RIPK2/HLA-G/CARD11/FYN/FADD/HLA-DPB1/TGM2/STX3/ITGB2/TNFRSF18/MDK/PTK2B/CEACAM6/EMILIN2	55
BP	GO:0008360	regulation of cell shape	27/1461	150/18670	3.69153e-05	0.00662745	0.00587245	KIT/WASF3/VEGFA/KDR/RND2/RDX/CDC42EP2/MYO10/FN1/ICAM1/CDC42EP1/CDC42EP5/ANXA1/PALM/ARAP1/MSN/CDC42EP3/CCL13/FYN/MYH14/FMNL1/ITGB2/HPN/RHOG/RND3/PTK2B/PLXNA3	27
BP	GO:0043405	regulation of MAP kinase activity	48/1461	337/18670	3.81668e-05	0.0066445	0.00588755	KIT/FZD8/DUSP19/GHR/KSR1/MAPK10/VEGFA/CHRNA7/HMGCR/SAMD5/TDGF1/MAP2K6/EDN3/MAP3K4/PDGFD/FZD4/TRAF6/SFRP1/FLT1/CARTPT/ITGA1/NEK10/CD24/MAP3K6/CXCL17/TPD52L1/GDF15/MAPKAPK3/DUSP5/MST1R/LYN/PDE5A/CD74/ADORA1/NOD1/AVPI1/RIPK2/DUSP4/TGFBR1/MAPKAPK2/PEA15/TGFA/IQGAP3/DUSP6/PTK2B/HGS/MDFIC/MUC20	48
BP	GO:0042110	T cell activation	61/1461	464/18670	4.34289e-05	0.00733821	0.00650223	KIT/BCL2/FZD8/RAG1/WNT4/FOXJ1/PRKCQ/SH3RF1/RAG2/DDOST/ZFP36L2/RC3H1/MAFB/TRAF6/GLMN/FKBP1A/CYP26B1/ZC3H8/GLI3/CD24/RUNX1/IL4R/LGALS3/SDC4/RELB/ICAM1/RUNX2/ANXA1/JAK3/EBI3/LYN/ELF4/TNFRSF21/PDE5A/CD74/CD276/MSN/GSN/CD55/LGALS1/HLA-DPA1/DPP4/CCND3/RAC2/CD151/RIPK2/SOX4/HLA-G/CARD11/FYN/FADD/HLA-DPB1/HLA-DOA/TNFRSF18/B2M/MDK/PELI1/LCP1/TCIRG1/STAT6/TMEM98	61
BP	GO:0060562	epithelial tube morphogenesis	46/1461	322/18670	5.09858e-05	0.00836895	0.00741556	BCL2/PRKACB/PAX8/PGF/STARD13/PROX1/WNT4/TCTN1/LRP2/VEGFA/SALL4/BBS4/AR/RYR2/CCDC40/SOSTDC1/TRAF6/LRP6/SFRP1/SETDB2/GLMN/GZF1/MKS1/GLI3/CC2D2A/MEF2C/FGFR2/SMO/SPINT1/CTSH/TACSTD2/MET/ST14/SDC4/CCM2/DVL1/GRHL3/MICAL2/VASP/TNC/SOX4/RARG/LZTS2/PRICKLE1/MDK/CITED1	46
BP	GO:0043087	regulation of GTPase activity	62/1461	479/18670	5.97945e-05	0.00923608	0.0081839	STXBP5L/ARHGAP24/TBC1D4/RIC8B/RANBP3L/DGKI/RGS17/STARD13/PRKG1/WNT4/IQGAP2/RGS16/GARNL3/FOXJ1/OPHN1/BBS4/RGS8/PREX2/ARHGAP22/ODAM/ARHGAP28/EPHA5/FAM13A/RAPGEF2/TBC1D19/SFRP1/MAPRE2/RAP1GAP/TRAPPC6A/RASGRP3/SYDE2/RDX/CDC42EP2/RGN/ALDH1A1/ABR/TBC1D2/TAX1BP3/RCC2/ICAM1/RIN1/SH3BP1/ARAP1/NGEF/RTKN/S100A10/ARHGAP23/EPHB3/AMOT/RASGRF1/LLGL1/GRHL3/DEPDC1B/ARHGAP10/CCL13/SRGAP2/RHOG/IQGAP3/CORO1C/PTK2B/R…	62
BP	GO:0046688	response to copper ion	12/1461	42/18670	6.09657e-05	0.00923608	0.0081839	MT1F/MT1G/MT1H/MT1M/MT1E/SOD3/MT1DP/MAP1LC3A/ATP7B/MT1X/ICAM1/PAM	12
BP	GO:1905477	positive regulation of protein localization to membrane	23/1461	122/18670	6.49172e-05	0.00923608	0.0081839	BCL2/PRKCE/ANK3/CNST/PPP1R13B/SPTBN1/PTPN9/BID/LGALS3/STAC/SFN/ITGA3/BBC3/ARF6/FYN/STX3/PMAIP1/ITGB2/ITGAM/TREM2/RHOG/YWHAH/CLIP3	23
BP	GO:0010273	detoxification of copper ion	7/1461	15/18670	6.50188e-05	0.00923608	0.0081839	MT1F/MT1G/MT1H/MT1M/MT1E/MT1DP/MT1X	7
BP	GO:1990169	stress response to copper ion	7/1461	15/18670	6.50188e-05	0.00923608	0.0081839	MT1F/MT1G/MT1H/MT1M/MT1E/MT1DP/MT1X	7
BP	GO:0022407	regulation of cell-cell adhesion	54/1461	402/18670	6.59146e-05	0.00923608	0.0081839	PRKG1/RAG1/WNT4/VEGFA/FOXJ1/PRKCQ/ANK3/ABAT/RC3H1/TRAF6/FOXA2/GLMN/ZC3H8/GCNT2/GLI3/RDX/MIA3/CD24/MYO10/RUNX1/IL4R/LGALS3/MAD2L2/PTPRU/FSTL3/SDC4/ICAM1/ANXA1/JAK3/EBI3/LYN/TNFRSF21/PDE5A/EPHB3/CD74/IL1RN/CD276/CDSN/CD55/LGALS1/HLA-DPA1/DPP4/RIPK2/MUC21/HLA-G/CARD11/FYN/FADD/HLA-DPB1/ITGB2/MDK/AKNA/PELI1/CEACAM6	54
BP	GO:0072175	epithelial tube formation	24/1461	132/18670	8.29275e-05	0.0113433	0.0100511	PRKACB/PAX8/PROX1/WNT4/TCTN1/LRP2/SALL4/BBS4/TRAF6/LRP6/SFRP1/GLMN/MKS1/CC2D2A/FGFR2/SPINT1/ST14/SDC4/DVL1/GRHL3/VASP/SOX4/RARG/PRICKLE1	24
BP	GO:0042098	T cell proliferation	30/1461	184/18670	9.57065e-05	0.0127868	0.0113302	WNT4/FOXJ1/PRKCQ/SH3RF1/RC3H1/TRAF6/GLMN/CD24/LGALS3/SDC4/ANXA1/JAK3/EBI3/ELF4/TNFRSF21/PDE5A/CD276/MSN/CD55/HLA-DPA1/CCND3/RAC2/CD151/RIPK2/HLA-G/CARD11/FYN/FADD/HLA-DPB1/PELI1	30
BP	GO:0072001	renal system development	42/1461	293/18670	9.82145e-05	0.0128237	0.0113628	IFT140/BCL2/PAX8/PGF/PROX1/WNT4/RARB/IFT88/VEGFA/FOXJ1/WFS1/NFIA/AGTR1/HSPB11/MAGI2/PDGFD/SFRP1/GZF1/CYP26B1/GLI3/MEF2C/CD24/ID3/TMED10/FGFR2/RGN/SMO/CTSH/TACSTD2/FSTL3/SDC4/ITGA3/ITGB4/STRA6/KANK2/SOX4/TGFBR1/BASP1/FADD/LZTS2/CITED1/STAT1	42
BP	GO:0002475	antigen processing and presentation via MHC class Ib	7/1461	16/18670	0.000107783	0.0134927	0.0119556	HLA-B/HLA-A/HLA-C/HLA-H/HLA-G/B2M/HLA-F	7
BP	GO:0055069	zinc ion homeostasis	11/1461	38/18670	0.000108036	0.0134927	0.0119556	MT1F/MT1G/MT1H/MT1M/MT1E/SLC39A14/SLC39A7/MT1DP/ATP7B/MT1X/TMC8	11
BP	GO:0021915	neural tube development	27/1461	160/18670	0.000116298	0.0142156	0.0125961	IFT140/PRKACB/PROX1/TCTN1/LRP2/SALL4/BBS4/SALL2/TRAF6/LRP6/SFRP1/GLMN/PAX6/MKS1/GLI3/CC2D2A/SMO/SPINT1/ST14/SDC4/DVL1/GRHL3/VASP/SOX4/RARG/PRICKLE1/GPR161	27
BP	GO:0070663	regulation of leukocyte proliferation	34/1461	222/18670	0.000121784	0.014576	0.0129155	BCL2/FOXJ1/PRKCQ/ENPP3/SH3RF1/RC3H1/TRAF6/GLMN/MPL/MEF2C/CD24/HHEX/LGALS3/SDC4/ANXA1/JAK3/EBI3/LYN/TNFRSF21/PDE5A/CD74/CD276/CD55/HLA-DPA1/RAC2/RIPK2/AHR/HLA-G/CARD11/FADD/HLA-DPB1/PELI1/MNDA/TYROBP	34
BP	GO:0071902	positive regulation of protein serine/threonine kinase activity	46/1461	336/18670	0.000142584	0.0166706	0.0147715	KIT/FZD8/DUSP19/GHR/PROX1/MAPK10/VEGFA/CHRNA7/SAMD5/TDGF1/MAP2K6/EDN3/MAP3K4/PDGFD/FZD4/RAPGEF2/TRAF6/FLT1/CARTPT/ITGA1/NEK10/CD24/MAP3K6/CXCL17/TPD52L1/GDF15/MAPKAPK3/DUSP5/MST1R/PDE5A/CD74/ADORA1/NOD1/CCND3/FAM20A/AVPI1/RIPK2/TGFBR1/MAPKAPK2/PEA15/TGFA/IQGAP3/DUSP6/PTK2B/MDFIC/MUC20	46
BP	GO:0048732	gland development	56/1461	434/18670	0.000145088	0.0166706	0.0147715	TFCP2L1/BCL2/ATP2C2/PAX8/CYP7B1/PROX1/RAG1/WNT4/RARB/ID4/TG/VEGFA/AACS/TDGF1/AR/FOXE1/CCDC40/SOSTDC1/MAFB/LRP6/SFRP1/PAX6/FKBP4/QDPR/ATP7B/SOCS2/GLI3/HMGCS1/FGFR2/RGN/SMO/MET/FSTL3/ANXA1/ELF3/LSR/ALOX15B/EPHB3/WNT10A/STRA6/CLDN1/MSN/PAM/TNC/TGFBR1/ARF6/FADD/RARG/TGM2/MDK/HPN/IQGAP3/STAT5A/STAT6/ALDH1A3/IGSF3	56
BP	GO:0110053	regulation of actin filament organization	38/1461	261/18670	0.0001491	0.0166859	0.014785	LMOD1/MAGEL2/PRKCE/WNT4/IQGAP2/CORO2B/DSTN/BBS4/RHOBTB1/ARHGAP28/LIMCH1/SFRP1/SPTBN1/RDX/FHOD3/CDC42EP2/TACSTD2/SPTBN2/MET/SDC4/ICAM1/CDC42EP1/CTTN/CDC42EP5/SH3BP1/ARAP1/FLNA/TMSB10/S100A10/GSN/VASP/CDC42EP3/ARPC5L/TGFBR1/ARF6/ARPC1B/SYNPO/PTK2B	38
BP	GO:0071346	cellular response to interferon-gamma	29/1461	180/18670	0.000153745	0.0166859	0.014785	AQP4/MID1/TDGF1/CDC42EP2/NCAM1/IRF5/ICAM1/GBP2/CD58/HLA-B/HLA-DRA/CLDN1/GSN/HLA-DQB2/ZYX/HLA-A/HLA-DPA1/HLA-C/HLA-H/HLA-DRB1/CCL13/HLA-G/HLA-DPB1/HLA-DQB1/CIITA/B2M/STAT1/HLA-F/HLA-DQA1	29
BP	GO:0048871	multicellular organismal homeostasis	61/1461	485/18670	0.000153934	0.0166859	0.014785	TFF3/BMP8A/ESRRG/BCL2/ADIPOR2/PRKACB/ACACB/TP53INP2/VEGFA/PLCL1/AQP4/ADAMTS5/PRDM16/PPARGC1A/BBS4/WFS1/TNFRSF11B/FABP4/ELOVL1/CD36/FOXO1/MAP2K6/ABAT/SPATA7/DIO2/MDM1/TRAF6/CYP26B1/CARTPT/DBH/MKS1/GCNT2/TMEM64/NPR3/SMO/ALDH1A1/CTSH/IL4R/MET/LCN2/SFN/SCD/TMEM79/SCNN1A/CLDN1/CDH3/ADORA1/GRHL3/RAC2/ADCY8/ACP5/PPP1R13L/ADCY7/G0S2/B2M/MLXIPL/PTK2B/TCIRG1/STAT6/CLDN4/ARNTL	61
BP	GO:0002064	epithelial cell development	32/1461	207/18670	0.000159535	0.0169727	0.0150392	TFCP2L1/BFSP1/MARVELD2/PROX1/GSTM3/RARB/RILPL1/VEGFA/FOXJ1/COL23A1/AR/LRTOMT/MAGI2/HSD17B4/RILPL2/RAPGEF2/PAX6/RDX/SMO/MET/ST14/ICAM1/SFN/TMEM79/TNFRSF1A/FLNA/CCM2/CLDN1/MSN/CDSN/RARG/ARNTL	32
BP	GO:0001841	neural tube formation	20/1461	105/18670	0.000164195	0.0170103	0.0150724	PRKACB/TCTN1/LRP2/SALL4/BBS4/TRAF6/LRP6/SFRP1/GLMN/MKS1/CC2D2A/SPINT1/ST14/SDC4/DVL1/GRHL3/VASP/SOX4/RARG/PRICKLE1	20
BP	GO:0046651	lymphocyte proliferation	39/1461	272/18670	0.000170292	0.0170103	0.0150724	BCL2/WNT4/FOXJ1/PRKCQ/SH3RF1/RAG2/RC3H1/TRAF6/GLMN/MPL/MEF2C/CD24/LGALS3/SDC4/ANXA1/JAK3/EBI3/LYN/ELF4/TNFRSF21/PDE5A/CD74/CD276/MSN/CD55/HLA-DPA1/CCND3/RAC2/CD151/RIPK2/AHR/HLA-G/CARD11/FYN/FADD/HLA-DPB1/PELI1/MNDA/TYROBP	39
BP	GO:0061687	detoxification of inorganic compound	7/1461	17/18670	0.000170872	0.0170103	0.0150724	MT1F/MT1G/MT1H/MT1M/MT1E/MT1DP/MT1X	7
BP	GO:0030198	extracellular matrix organization	49/1461	368/18670	0.000174283	0.0170103	0.0150724	FMOD/SCUBE3/COL9A3/GFOD2/ADAMTS3/COL4A6/COL25A1/ADAMTS5/COL23A1/COL4A5/CSGALNACT1/TNFRSF11B/MMP15/KDR/LAMB4/ITGA1/GPM6B/SMOC2/ST7/SCUBE1/SPINT1/FN1/LAMB3/ICAM1/TIMP1/QSOX1/ANXA2/TMPRSS6/CYP1B1/ITGA3/ELF3/COL8A2/TNFRSF1A/ANXA2P2/KLK7/ITGB4/ICAM5/SPOCK2/DPP4/TNC/TGFBR1/ITGB8/ITGB2/ITGAM/NFKB2/HPN/LCP1/ADAMTS14/CTSS	49
BP	GO:0050670	regulation of lymphocyte proliferation	32/1461	208/18670	0.000174692	0.0170103	0.0150724	BCL2/FOXJ1/PRKCQ/SH3RF1/RC3H1/TRAF6/GLMN/MPL/MEF2C/CD24/LGALS3/SDC4/ANXA1/JAK3/EBI3/LYN/TNFRSF21/PDE5A/CD74/CD276/CD55/HLA-DPA1/RAC2/RIPK2/AHR/HLA-G/CARD11/FADD/HLA-DPB1/PELI1/MNDA/TYROBP	32
BP	GO:0001843	neural tube closure	18/1461	90/18670	0.000181241	0.0173539	0.0153769	PRKACB/LRP2/SALL4/BBS4/TRAF6/LRP6/SFRP1/GLMN/MKS1/CC2D2A/SPINT1/ST14/SDC4/DVL1/GRHL3/VASP/RARG/PRICKLE1	18
BP	GO:0043062	extracellular structure organization	49/1461	369/18670	0.000186085	0.0175256	0.015529	FMOD/SCUBE3/COL9A3/GFOD2/ADAMTS3/COL4A6/COL25A1/ADAMTS5/COL23A1/COL4A5/CSGALNACT1/TNFRSF11B/MMP15/KDR/LAMB4/ITGA1/GPM6B/SMOC2/ST7/SCUBE1/SPINT1/FN1/LAMB3/ICAM1/TIMP1/QSOX1/ANXA2/TMPRSS6/CYP1B1/ITGA3/ELF3/COL8A2/TNFRSF1A/ANXA2P2/KLK7/ITGB4/ICAM5/SPOCK2/DPP4/TNC/TGFBR1/ITGB8/ITGB2/ITGAM/NFKB2/HPN/LCP1/ADAMTS14/CTSS	49
BP	GO:0032944	regulation of mononuclear cell proliferation	32/1461	209/18670	0.000191125	0.0177099	0.0156924	BCL2/FOXJ1/PRKCQ/SH3RF1/RC3H1/TRAF6/GLMN/MPL/MEF2C/CD24/LGALS3/SDC4/ANXA1/JAK3/EBI3/LYN/TNFRSF21/PDE5A/CD74/CD276/CD55/HLA-DPA1/RAC2/RIPK2/AHR/HLA-G/CARD11/FADD/HLA-DPB1/PELI1/MNDA/TYROBP	32
BP	GO:0032943	mononuclear cell proliferation	39/1461	274/18670	0.000198729	0.0181221	0.0160577	BCL2/WNT4/FOXJ1/PRKCQ/SH3RF1/RAG2/RC3H1/TRAF6/GLMN/MPL/MEF2C/CD24/LGALS3/SDC4/ANXA1/JAK3/EBI3/LYN/ELF4/TNFRSF21/PDE5A/CD74/CD276/MSN/CD55/HLA-DPA1/CCND3/RAC2/CD151/RIPK2/AHR/HLA-G/CARD11/FYN/FADD/HLA-DPB1/PELI1/MNDA/TYROBP	39
BP	GO:0060606	tube closure	18/1461	91/18670	0.000209661	0.0188203	0.0166763	PRKACB/LRP2/SALL4/BBS4/TRAF6/LRP6/SFRP1/GLMN/MKS1/CC2D2A/SPINT1/ST14/SDC4/DVL1/GRHL3/VASP/RARG/PRICKLE1	18
BP	GO:0042476	odontogenesis	23/1461	132/18670	0.000223187	0.0197263	0.017479	ADAMTS5/WDR72/TNFRSF11B/FOXO1/ZNF22/ODAM/SOSTDC1/AXIN2/TRAF6/LRP6/GLI3/ID3/FGFR2/SMO/FAM20C/RUNX2/PERP/WNT10A/ITGB4/PAM/FAM20A/TNC/TCIRG1	23
BP	GO:0001838	embryonic epithelial tube formation	22/1461	124/18670	0.000232244	0.0198041	0.017548	PRKACB/PAX8/WNT4/TCTN1/LRP2/SALL4/BBS4/TRAF6/LRP6/SFRP1/GLMN/MKS1/CC2D2A/SPINT1/ST14/SDC4/DVL1/GRHL3/VASP/SOX4/RARG/PRICKLE1	22
BP	GO:0061436	establishment of skin barrier	8/1461	23/18670	0.000232694	0.0198041	0.017548	ELOVL1/CYP26B1/MET/SFN/TMEM79/CLDN1/GRHL3/CLDN4	8
BP	GO:1902903	regulation of supramolecular fiber organization	47/1461	353/18670	0.000234409	0.0198041	0.017548	LMOD1/MAGEL2/PRKCE/PROX1/WNT4/IQGAP2/CORO2B/CHRNA7/MID1/DSTN/BBS4/RHOBTB1/ARHGAP28/LIMCH1/SFRP1/FKBP4/SPTBN1/RDX/FHOD3/CDC42EP2/MEF2C/TACSTD2/SPTBN2/MET/SDC4/ICAM1/CDC42EP1/CTTN/CDC42EP5/SH3BP1/ARAP1/FLNA/TMSB10/S100A10/MAP2/GSN/VASP/CDC42EP3/ARPC5L/TGFBR1/ARF6/MAP1S/ARPC1B/SYNPO/CLIP3/LDLR/PTK2B	47
BP	GO:0016331	morphogenesis of embryonic epithelium	25/1461	150/18670	0.00024965	0.020786	0.0184181	PRKACB/PAX8/WNT4/TCTN1/LRP2/SALL4/BBS4/AR/TRAF6/LRP6/SFRP1/GLMN/MKS1/CC2D2A/FGFR2/SPINT1/ST14/SDC4/DVL1/GRHL3/VASP/SOX4/RARG/PRICKLE1/ALDH1A3	25
BP	GO:0022604	regulation of cell morphogenesis	60/1461	484/18670	0.000256511	0.0210522	0.018654	SEMA3D/KIT/CALR/WASF3/STK25/VEGFA/TRPC6/MAP6/GORASP1/LRRC4C/SDC2/FZD4/RAPGEF2/KDR/XK/BHLHB9/RND2/MPL/CUX1/RDX/CDC42EP2/MYO10/UST/FN1/TACSTD2/TTL/RCC2/ICAM1/WTIP/CDC42EP1/TNFRSF12A/CTTN/CDC42EP5/ANXA1/PALM/ARAP1/NGEF/FLNA/S100A10/DVL1/EPHB3/SRCIN1/MSN/MAP2/CDC42EP3/CCL13/SYT1/FYN/MYH14/FMNL1/ITGB2/MDK/HPN/RHOG/YWHAH/RND3/CORO1C/PTK2B/RTN4R/PLXNA3	60
BP	GO:0001822	kidney development	39/1461	278/18670	0.000268726	0.021623	0.0191597	BCL2/PAX8/PGF/PROX1/WNT4/RARB/IFT88/VEGFA/FOXJ1/WFS1/AGTR1/HSPB11/MAGI2/PDGFD/SFRP1/GZF1/CYP26B1/GLI3/MEF2C/CD24/ID3/TMED10/FGFR2/RGN/SMO/CTSH/TACSTD2/FSTL3/SDC4/ITGA3/STRA6/KANK2/SOX4/TGFBR1/BASP1/FADD/LZTS2/CITED1/STAT1	39
BP	GO:0043312	neutrophil degranulation	60/1461	485/18670	0.000270993	0.021623	0.0191597	MLEC/METTL7A/IQGAP2/MAGT1/DNAJC3/LRRC7/DDOST/CD36/AGL/DNAJC5/FAF2/ALDH3B1/MVP/CTSH/ABR/TMC6/SERPINA1/LGALS3/S100A11/CHI3L1/LCN2/CD58/QSOX1/ANXA2/NPC2/STBD1/ALOX5/CTSD/CTSC/PLAUR/CTSA/C3/GSN/CD55/FTH1/HLA-H/SLPI/LRG1/HPSE/CCT8/OSCAR/FCGR2A/CLEC5A/SLC15A4/VAT1/SNAP25/ITGB2/ITGAM/B2M/OLR1/RHOG/PLAU/MNDA/TYROBP/CSTB/TCIRG1/CEACAM6/RAP2B/CTSS/CD59	60
BP	GO:0002495	antigen processing and presentation of peptide antigen via MHC class II	19/1461	101/18670	0.000279993	0.0220351	0.0195248	CANX/DYNC1I1/KIF5A/TRAF6/LGMN/SPTBN2/CTSD/CD74/HLA-DRA/HLA-DQB2/HLA-DPA1/HLA-DRB1/HLA-DMA/HLA-DPB1/HLA-DOA/HLA-DQB1/TREM2/HLA-DQA1/CTSS	19
BP	GO:0007162	negative regulation of cell adhesion	40/1461	289/18670	0.000299682	0.0232658	0.0206154	PRKG1/CORO2B/VEGFA/FOXJ1/ABAT/RC3H1/FZD4/GLMN/ZC3H8/GCNT2/GLI3/RDX/ADAM22/MIA3/RUNX1/IL4R/LGALS3/TACSTD2/MAD2L2/SDC4/RCC2/CYP1B1/ANXA1/JAK3/TNFRSF21/ERBB3/MUC1/PDE5A/CD74/IL1RN/CDSN/LGALS1/TNC/MUC21/HLA-G/MDK/AKNA/PELI1/CORO1C/PLXNA3	40
BP	GO:0002283	neutrophil activation involved in immune response	60/1461	488/18670	0.000318982	0.0239732	0.0212421	MLEC/METTL7A/IQGAP2/MAGT1/DNAJC3/LRRC7/DDOST/CD36/AGL/DNAJC5/FAF2/ALDH3B1/MVP/CTSH/ABR/TMC6/SERPINA1/LGALS3/S100A11/CHI3L1/LCN2/CD58/QSOX1/ANXA2/NPC2/STBD1/ALOX5/CTSD/CTSC/PLAUR/CTSA/C3/GSN/CD55/FTH1/HLA-H/SLPI/LRG1/HPSE/CCT8/OSCAR/FCGR2A/CLEC5A/SLC15A4/VAT1/SNAP25/ITGB2/ITGAM/B2M/OLR1/RHOG/PLAU/MNDA/TYROBP/CSTB/TCIRG1/CEACAM6/RAP2B/CTSS/CD59	60
BP	GO:0002504	antigen processing and presentation of peptide or polysaccharide antigen via MHC class II	19/1461	102/18670	0.000319276	0.0239732	0.0212421	CANX/DYNC1I1/KIF5A/TRAF6/LGMN/SPTBN2/CTSD/CD74/HLA-DRA/HLA-DQB2/HLA-DPA1/HLA-DRB1/HLA-DMA/HLA-DPB1/HLA-DOA/HLA-DQB1/TREM2/HLA-DQA1/CTSS	19
BP	GO:0006882	cellular zinc ion homeostasis	10/1461	36/18670	0.000321312	0.0239732	0.0212421	MT1F/MT1G/MT1H/MT1M/MT1E/SLC39A14/SLC39A7/MT1DP/ATP7B/MT1X	10
BP	GO:0071248	cellular response to metal ion	29/1461	188/18670	0.000328726	0.0242119	0.0214537	MT1F/MT1G/CALR/MT1H/HSPA5/MT1M/SYT9/ANK3/MT1E/PPARGC1A/FABP4/MT1DP/ZNF658/DLG2/MAP1LC3A/KCNK3/LGMN/MT1X/MEF2C/SYT12/FSTL3/RYR1/CLDN1/GSN/ALOX5AP/ADCY8/SYT1/ADCY7/B2M	29
BP	GO:0045063	T-helper 1 cell differentiation	7/1461	19/18670	0.000385113	0.028006	0.0248156	IL4R/RELB/ANXA1/JAK3/RIPK2/STAT6/TMEM98	7
BP	GO:2001236	regulation of extrinsic apoptotic signaling pathway	25/1461	155/18670	0.000417393	0.029974	0.0265594	BCL2/PDIA3/WWOX/SH3RF1/AR/SFRP1/RFFL/DBH/ZMYND11/BID/LGALS3/ICAM1/TNFRSF12A/CTTN/BCL2L1/TMC8/SIAH2/TGFBR1/FYN/FADD/LMNA/G0S2/PEA15/PMAIP1/CSF2	25
BP	GO:0014020	primary neural tube formation	18/1461	97/18670	0.000476274	0.0337802	0.0299319	PRKACB/LRP2/SALL4/BBS4/TRAF6/LRP6/SFRP1/GLMN/MKS1/CC2D2A/SPINT1/ST14/SDC4/DVL1/GRHL3/VASP/RARG/PRICKLE1	18
BP	GO:0030104	water homeostasis	15/1461	74/18670	0.000524696	0.0359614	0.0318647	PRKACB/AQP4/WFS1/ELOVL1/SCTR/CYP26B1/MET/SFN/TMEM79/SCNN1A/CLDN1/GRHL3/ADCY8/ADCY7/CLDN4	15
BP	GO:0031340	positive regulation of vesicle fusion	5/1461	10/18670	0.000525807	0.0359614	0.0318647	SYT9/ANXA2/ANXA1/ANXA2P2/SYT1	5
BP	GO:0051014	actin filament severing	5/1461	10/18670	0.000525807	0.0359614	0.0318647	DSTN/FLII/GSN/SRGAP2/FMNL1	5
BP	GO:0042119	neutrophil activation	60/1461	498/18670	0.000539377	0.0361152	0.0320009	MLEC/METTL7A/IQGAP2/MAGT1/DNAJC3/LRRC7/DDOST/CD36/AGL/DNAJC5/FAF2/ALDH3B1/MVP/CTSH/ABR/TMC6/SERPINA1/LGALS3/S100A11/CHI3L1/LCN2/CD58/QSOX1/ANXA2/NPC2/STBD1/ALOX5/CTSD/CTSC/PLAUR/CTSA/C3/GSN/CD55/FTH1/HLA-H/SLPI/LRG1/HPSE/CCT8/OSCAR/FCGR2A/CLEC5A/SLC15A4/VAT1/SNAP25/ITGB2/ITGAM/B2M/OLR1/RHOG/PLAU/MNDA/TYROBP/CSTB/TCIRG1/CEACAM6/RAP2B/CTSS/CD59	60
BP	GO:0019886	antigen processing and presentation of exogenous peptide antigen via MHC class II	18/1461	98/18670	0.000541524	0.0361152	0.0320009	CANX/DYNC1I1/KIF5A/TRAF6/LGMN/SPTBN2/CTSD/CD74/HLA-DRA/HLA-DQB2/HLA-DPA1/HLA-DRB1/HLA-DMA/HLA-DPB1/HLA-DOA/HLA-DQB1/HLA-DQA1/CTSS	18
BP	GO:0042475	odontogenesis of dentin-containing tooth	17/1461	90/18670	0.000546914	0.0361152	0.0320009	WDR72/TNFRSF11B/FOXO1/ODAM/SOSTDC1/TRAF6/LRP6/GLI3/SMO/FAM20C/RUNX2/PERP/WNT10A/ITGB4/FAM20A/TNC/TCIRG1	17
BP	GO:0002446	neutrophil mediated immunity	60/1461	499/18670	0.00056761	0.0370559	0.0328345	MLEC/METTL7A/IQGAP2/MAGT1/DNAJC3/LRRC7/DDOST/CD36/AGL/DNAJC5/FAF2/ALDH3B1/MVP/CTSH/ABR/TMC6/SERPINA1/LGALS3/S100A11/CHI3L1/LCN2/CD58/QSOX1/ANXA2/NPC2/STBD1/ALOX5/CTSD/CTSC/PLAUR/CTSA/C3/GSN/CD55/FTH1/HLA-H/SLPI/LRG1/HPSE/CCT8/OSCAR/FCGR2A/CLEC5A/SLC15A4/VAT1/SNAP25/ITGB2/ITGAM/B2M/OLR1/RHOG/PLAU/MNDA/TYROBP/CSTB/TCIRG1/CEACAM6/RAP2B/CTSS/CD59	60
BP	GO:0051056	regulation of small GTPase mediated signal transduction	44/1461	338/18670	0.000592084	0.0374655	0.0331974	CDON/ARHGAP24/DGKI/STARD13/ARHGEF9/GARNL3/CGNL1/CYTH3/KCTD10/OPHN1/RALGPS1/PLEKHG4B/RHOBTB1/PREX2/ARHGAP22/FARP2/ARHGAP28/ARHGEF4/ARHGEF33/FAM13A/MAPRE2/FBXO8/RAP1GAP/SYDE2/RDX/ABR/MET/ITGA3/SH3BP1/ARAP1/NGEF/LYN/ARHGAP23/AMOT/RASGRF1/DEPDC1B/KANK2/RAC2/ARHGAP10/ARF6/SRGAP2/RASGEF1A/RHOG/RTN4R	44
BP	GO:0050808	synapse organization	51/1461	408/18670	0.000594946	0.0374655	0.0331974	SHANK2/FLRT1/LINGO2/WASF3/CNTN5/CACNB4/PCLO/GABRB3/OPHN1/ANK3/CACNA2D2/CHRNA7/SLITRK5/COL4A5/GPM6A/NFIA/DLG2/ARHGAP22/MAGI2/LRRC4C/LRRTM2/ZC4H2/LGMN/BHLHB9/UNC13C/MEF2C/SPTBN2/CTTN/GABRB2/ITGA3/PALM/NGEF/DVL1/C3/EPHB3/SRCIN1/SPOCK2/IL1RAP/TNC/ARF6/FYN/SYN1/CAST/ITGAM/GAP43/TREM2/SYNPO/ACTN1/PTPRF/LRFN4/IGSF9	51
BP	GO:0001916	positive regulation of T cell mediated cytotoxicity	8/1461	26/18670	0.00059997	0.0374655	0.0331974	HLA-B/HLA-A/HLA-C/HLA-H/HLA-G/FADD/B2M/HLA-F	8
BP	GO:0033561	regulation of water loss via skin	8/1461	26/18670	0.00059997	0.0374655	0.0331974	ELOVL1/CYP26B1/MET/SFN/TMEM79/CLDN1/GRHL3/CLDN4	8
BP	GO:0000187	activation of MAPK activity	28/1461	186/18670	0.000615331	0.0380116	0.0336813	KIT/GHR/MAPK10/CHRNA7/TDGF1/MAP2K6/MAP3K4/TRAF6/CARTPT/ITGA1/MAP3K6/CXCL17/GDF15/MAPKAPK3/DUSP5/CD74/ADORA1/NOD1/AVPI1/RIPK2/TGFBR1/MAPKAPK2/PEA15/TGFA/IQGAP3/DUSP6/MDFIC/MUC20	28
BP	GO:0006066	alcohol metabolic process	47/1461	370/18670	0.000675699	0.0408788	0.0362219	GPAM/MIOX/PLCD4/CYP7B1/ACACB/WNT4/IP6K3/PLCH1/CYP46A1/PLCL1/SULT1A2/INPP5A/RDH11/CYP27B1/FDX1/HMGCR/NUS1/INPPL1/VLDLR/IMPA2/TRERF1/CHKA/QDPR/DBH/SULT1C4/CETP/HMGCS1/ALDH1A1/PLCD3/ALDH3B1/CYP1B1/NPC2/SCD/APOL2/APOL1/SPHK1/P2RY6/ITPKC/HSD3B7/RDH5/NPC1/SULT2B1/DHRS3/LDLR/PTK2B/PLD4/ALDH1A3	47
BP	GO:0050891	multicellular organismal water homeostasis	14/1461	68/18670	0.000675977	0.0408788	0.0362219	PRKACB/AQP4/WFS1/ELOVL1/CYP26B1/MET/SFN/TMEM79/SCNN1A/CLDN1/GRHL3/ADCY8/ADCY7/CLDN4	14
BP	GO:0010810	regulation of cell-substrate adhesion	31/1461	215/18670	0.000686999	0.0411126	0.0364291	BCL2/CALR/PRKCE/WNT4/CORO2B/VEGFA/CD36/LIMCH1/FZD4/SFRP1/KDR/GCNT2/GPM6B/SMOC2/FN1/TACSTD2/SDC4/RCC2/ITGA3/FLNA/S100A10/SPOCK2/LGALS1/EMP2/RAC2/MDK/PLAU/CORO1C/PTK2B/CEACAM6/EMILIN2	31
BP	GO:0006790	sulfur compound metabolic process	47/1461	372/18670	0.000759569	0.0449869	0.0398619	CTH/FMOD/GHR/PAX8/GSTM3/ACACB/ACSF2/SULT1A2/SLC35D2/TPST1/CHST14/CSGALNACT1/ELOVL1/AHCYL2/ACSM5/HSD17B4/ISCA1/GGTLC1/MCCC2/SLC35B3/SUOX/MAT2A/SULT1C4/HMGCS1/GNMT/AASS/UST/PAPSS2/ETHE1/GGCT/B3GNT3/ACOT7/SCD/PDK3/SPOCK2/ACOT9/MICAL2/GLRX3/SULT2B1/PC/IDS/PAPSS1/GPX4/HPGDS/PPT1/STAT5A/ELOVL7	47
BP	GO:0071280	cellular response to copper ion	8/1461	27/18670	0.000794627	0.0458751	0.040649	MT1F/MT1G/MT1H/MT1M/MT1E/MT1DP/MAP1LC3A/MT1X	8
BP	GO:0022408	negative regulation of cell-cell adhesion	27/1461	180/18670	0.000806277	0.0458751	0.040649	PRKG1/VEGFA/FOXJ1/ABAT/RC3H1/GLMN/ZC3H8/GLI3/RDX/MIA3/RUNX1/IL4R/LGALS3/MAD2L2/SDC4/ANXA1/JAK3/TNFRSF21/PDE5A/CD74/IL1RN/CDSN/MUC21/HLA-G/MDK/AKNA/PELI1	27
BP	GO:0030832	regulation of actin filament length	27/1461	180/18670	0.000806277	0.0458751	0.040649	LMOD1/MAGEL2/PRKCE/IQGAP2/NEB/DSTN/BBS4/RHOBTB1/ARHGAP28/SPTBN1/RDX/FHOD3/CDC42EP2/SPTBN2/ICAM1/CDC42EP1/CTTN/CDC42EP5/SH3BP1/TMSB10/GSN/VASP/CDC42EP3/ARPC5L/ARF6/ARPC1B/PTK2B	27
BP	GO:0030111	regulation of Wnt signaling pathway	46/1461	363/18670	0.000806507	0.0458751	0.040649	MLLT3/TCF7L1/CXXC4/WWOX/TLE6/TLE1/TMEM170B/FOXO1/LATS2/SOSTDC1/NLK/AXIN2/LRP6/SFRP1/MKS1/GLI3/CSNK1G1/TMEM64/HHEX/FGFR2/TNN/RUNX1/MAD2L2/PSMB8/PTPRU/TAX1BP3/ITGA3/RSPO4/DVL1/PLEKHA4/CDH3/DEPDC1B/SCEL/IGFBP6/SOX4/SIAH2/AXIN1/NXN/LZTS2/PRICKLE1/MDK/CITED1/PSMB9/RNF220/MDFIC/ARNTL	46
CC	GO:0042611	MHC protein complex	17/1515	25/19717	6.22158e-14	4.02537e-11	3.23522e-11	HLA-B/CD74/HLA-DRA/HLA-DQB2/HLA-A/HLA-DPA1/HLA-C/HLA-H/HLA-DRB1/HLA-G/HLA-DMA/HLA-DPB1/HLA-DOA/HLA-DQB1/B2M/HLA-F/HLA-DQA1	17
CC	GO:0071556	integral component of lumenal side of endoplasmic reticulum membrane	16/1515	29/19717	3.54809e-11	7.65205e-09	6.15003e-09	CALR/CANX/HLA-B/CD74/HLA-DRA/HLA-DQB2/HLA-A/HLA-DPA1/HLA-C/HLA-H/HLA-DRB1/HLA-G/HLA-DPB1/HLA-DQB1/HLA-F/HLA-DQA1	16
CC	GO:0098553	lumenal side of endoplasmic reticulum membrane	16/1515	29/19717	3.54809e-11	7.65205e-09	6.15003e-09	CALR/CANX/HLA-B/CD74/HLA-DRA/HLA-DQB2/HLA-A/HLA-DPA1/HLA-C/HLA-H/HLA-DRB1/HLA-G/HLA-DPB1/HLA-DQB1/HLA-F/HLA-DQA1	16
CC	GO:0098576	lumenal side of membrane	17/1515	34/19717	6.87563e-11	1.11213e-08	8.93832e-09	CALR/CANX/HLA-B/CTSA/CD74/HLA-DRA/HLA-DQB2/HLA-A/HLA-DPA1/HLA-C/HLA-H/HLA-DRB1/HLA-G/HLA-DPB1/HLA-DQB1/HLA-F/HLA-DQA1	17
CC	GO:0005925	focal adhesion	70/1515	405/19717	1.05648e-10	1.36709e-08	1.09874e-08	ARHGAP24/SORBS2/HSP90B1/CALR/FLRT1/FHL1/HYOU1/FBLN7/HSPA5/CORO2B/PDIA3/NEXN/LAYN/TNS1/ARHGAP22/CSRP2/NUMB/ANXA6/TLN2/FLT1/ITGA1/MAPRE2/LMLN/RDX/FLII/SDC4/ICAM1/GRB7/CDC42EP1/CTTN/ITGA3/ANXA1/FLNA/HMGA1/PLAUR/ITGB4/MSN/GSN/ZYX/DPP4/VASP/RPS4X/RAC2/TNC/ARPC5L/CD151/FHL3/CNN3/ARF6/ITGB8/MRC2/TGM2/ARPC1B/ITGB2/PABPC1/RPS2/B2M/RHOG/ACTN1/PLAU/RND3/LCP1/CORO1C/PTK2B/PLEC/LASP1/PDLIM7/REXO2/DST/CD59	70
CC	GO:0030055	cell-substrate junction	70/1515	412/19717	2.31015e-10	2.49111e-08	2.00213e-08	ARHGAP24/SORBS2/HSP90B1/CALR/FLRT1/FHL1/HYOU1/FBLN7/HSPA5/CORO2B/PDIA3/NEXN/LAYN/TNS1/ARHGAP22/CSRP2/NUMB/ANXA6/TLN2/FLT1/ITGA1/MAPRE2/LMLN/RDX/FLII/SDC4/ICAM1/GRB7/CDC42EP1/CTTN/ITGA3/ANXA1/FLNA/HMGA1/PLAUR/ITGB4/MSN/GSN/ZYX/DPP4/VASP/RPS4X/RAC2/TNC/ARPC5L/CD151/FHL3/CNN3/ARF6/ITGB8/MRC2/TGM2/ARPC1B/ITGB2/PABPC1/RPS2/B2M/RHOG/ACTN1/PLAU/RND3/LCP1/CORO1C/PTK2B/PLEC/LASP1/PDLIM7/REXO2/DST/CD59	70
CC	GO:0030176	integral component of endoplasmic reticulum membrane	35/1515	150/19717	2.12035e-09	1.95981e-07	1.57512e-07	CALR/HSPA5/PDIA3/EXT1/CANX/TMCO1/WFS1/ELOVL1/SLC35B1/TEX261/TAPT1/SEC62/SLC35B3/SCD/HLA-B/CD74/HLA-DRA/HLA-DQB2/HLA-A/HLA-DPA1/HLA-C/HLA-H/HLA-DRB1/HLA-G/TAP1/HLA-DPB1/RNF183/ANKLE2/HLA-DQB1/B2M/EDEM1/HLA-F/HLA-DQA1/ESYT1/ELOVL7	35
CC	GO:0031227	intrinsic component of endoplasmic reticulum membrane	36/1515	158/19717	2.49652e-09	2.01906e-07	1.62274e-07	CALR/HSPA5/PDIA3/EXT1/CANX/TMCO1/WFS1/ELOVL1/SLC35B1/TEX261/TAPT1/SEC62/SLC35B3/SCD/HLA-B/CD74/HLA-DRA/HLA-DQB2/HLA-A/HLA-DPA1/HLA-C/HLA-H/GRAMD1A/HLA-DRB1/HLA-G/TAP1/HLA-DPB1/RNF183/ANKLE2/HLA-DQB1/B2M/EDEM1/HLA-F/HLA-DQA1/ESYT1/ELOVL7	36
CC	GO:0042613	MHC class II protein complex	10/1515	16/19717	3.63158e-08	2.6107e-06	2.09825e-06	CD74/HLA-DRA/HLA-DQB2/HLA-DPA1/HLA-DRB1/HLA-DMA/HLA-DPB1/HLA-DOA/HLA-DQB1/HLA-DQA1	10
CC	GO:0030134	COPII-coated ER to Golgi transport vesicle	24/1515	93/19717	9.20169e-08	5.70178e-06	4.58257e-06	LMAN2L/TEX261/F8/TMED4/TMED10/SERPINA1/HLA-B/CTSC/CD74/HLA-DRA/HLA-DQB2/HLA-A/HLA-DPA1/HLA-C/HLA-H/HLA-DRB1/HLA-G/HLA-DPB1/HLA-DQB1/TGFA/B2M/HLA-F/HLA-DQA1/CD59	24
CC	GO:0019897	extrinsic component of plasma membrane	34/1515	165/19717	9.6939e-08	5.70178e-06	4.58257e-06	GNA14/AAK1/KCNAB1/DGKI/SYTL3/GNAI1/CYTH3/TDGF1/RGS8/NUMB/OLFM2/CDHR3/GNAL/SCUBE1/GNG7/S100A6/ST14/STAC/ANXA2/ANXA1/LYN/S100A10/PRSS22/PLEKHA4/CDH3/MFGE8/SYTL1/GRAMD1A/FYN/SNAP25/GNA15/CDH11/PTK2B/ESYT1	34
CC	GO:0030658	transport vesicle membrane	38/1515	208/19717	4.66329e-07	2.51429e-05	2.02076e-05	ITPR1/CA4/SYT9/MAP6/WFS1/RASSF9/SYP/DBH/RAB1A/DNAJC5/UNC13C/TMED10/SYT12/HLA-B/CD74/BCL2L1/HLA-DRA/PAM/HLA-DQB2/HLA-A/HLA-DPA1/SYNGR3/HLA-C/TMEM184A/HLA-H/SYNGR2/HLA-DRB1/SYT1/HLA-G/SYN1/HLA-DPB1/HLA-DQB1/TGFA/B2M/HLA-F/TMEM163/HLA-DQA1/CD59	38
CC	GO:0030139	endocytic vesicle	49/1515	303/19717	5.32952e-07	2.56864e-05	2.06444e-05	HSP90B1/CALR/HYOU1/WNT4/PDIA3/LRP2/CD36/ATP6V0E2/FZD4/RAPGEF2/CDC42EP2/SMO/FCHO1/HLA-B/SFTPB/SPHK1/CD74/HLA-DRA/GSN/AMOT/HLA-DQB2/ZYX/HLA-A/HLA-DPA1/DPP4/HLA-C/RAC2/HLA-H/RAB32/HLA-DRB1/ARF6/HLA-G/SRGAP2/TAP1/FMNL1/HLA-DPB1/HLA-DQB1/ANXA11/MARCO/CACNG4/B2M/GNLY/LDLR/PLD4/GPR161/HLA-F/TCIRG1/HLA-DQA1/NCF2	49
CC	GO:0012507	ER to Golgi transport vesicle membrane	18/1515	62/19717	5.55811e-07	2.56864e-05	2.06444e-05	TMED10/HLA-B/CD74/HLA-DRA/HLA-DQB2/HLA-A/HLA-DPA1/HLA-C/HLA-H/HLA-DRB1/HLA-G/HLA-DPB1/HLA-DQB1/TGFA/B2M/HLA-F/HLA-DQA1/CD59	18
CC	GO:0042470	melanosome	24/1515	106/19717	1.24111e-06	5.01873e-05	4.0336e-05	HSP90B1/HSPA5/PDIA4/PDIA6/PDIA3/CANX/ATP1A1/OCA2/ANXA6/RAB1A/DNAJC5/TMED10/MYRIP/ANXA2/CTSD/ANXA2P2/SLC1A5/ATP1B3/SYTL1/RAB32/ATP6V1B2/SLC3A2/STX3/ANXA11	24
CC	GO:0048770	pigment granule	24/1515	106/19717	1.24111e-06	5.01873e-05	4.0336e-05	HSP90B1/HSPA5/PDIA4/PDIA6/PDIA3/CANX/ATP1A1/OCA2/ANXA6/RAB1A/DNAJC5/TMED10/MYRIP/ANXA2/CTSD/ANXA2P2/SLC1A5/ATP1B3/SYTL1/RAB32/ATP6V1B2/SLC3A2/STX3/ANXA11	24
CC	GO:0016323	basolateral plasma membrane	37/1515	217/19717	3.63384e-06	0.0001383	0.000111153	SLC4A4/SLC26A7/CDH16/MARVELD2/SLC7A6/ANK2/AQP4/ANK3/LRRC7/OSCP1/DLG2/ATP1A1/KCNQ1/NUMB/ATP7B/TACSTD2/MET/ST14/ANXA2/ITGA3/ANXA1/PALM/ERBB3/P2RY6/CLDN1/MSN/ADORA1/NOD1/CLDN7/MYO1D/ADCY8/SHROOM4/TGFA/LDLR/CLDN4/MUC20/DST	37
CC	GO:0045121	membrane raft	48/1515	315/19717	3.88004e-06	0.000139466	0.00011209	IRS1/GNAI1/ANK2/CHRNA7/KCNE3/TDGF1/CD36/HK1/ATP1A1/KCNQ1/LRP6/KDR/ITGA1/GPM6B/CD24/SMO/SDC4/ICAM1/PI4K2A/ANXA2/CTSD/LYN/TNFRSF1A/S100A10/ATP1B3/CD55/EHD2/DPP4/MYO1D/EMP2/NPC1/ADCY8/TGFBR1/HPSE/CARD11/FYN/FADD/ITGB2/ITGAM/OLR1/PPT1/CLIP3/CORO1C/PTK2B/RTN4R/SELPLG/RAP2B/STAT6	48
CC	GO:0098857	membrane microdomain	48/1515	316/19717	4.24126e-06	0.000144426	0.000116077	IRS1/GNAI1/ANK2/CHRNA7/KCNE3/TDGF1/CD36/HK1/ATP1A1/KCNQ1/LRP6/KDR/ITGA1/GPM6B/CD24/SMO/SDC4/ICAM1/PI4K2A/ANXA2/CTSD/LYN/TNFRSF1A/S100A10/ATP1B3/CD55/EHD2/DPP4/MYO1D/EMP2/NPC1/ADCY8/TGFBR1/HPSE/CARD11/FYN/FADD/ITGB2/ITGAM/OLR1/PPT1/CLIP3/CORO1C/PTK2B/RTN4R/SELPLG/RAP2B/STAT6	48
CC	GO:0030018	Z disc	26/1515	132/19717	7.20179e-06	0.000232978	0.000187246	SORBS2/KY/NEB/NEXN/ANK2/ANK3/RYR2/CSRP2/FKBP1A/PDLIM3/HDAC4/FHOD3/PDLIM4/RYR1/FLNA/KRT19/GLRX3/FHL3/BAG3/AHNAK2/SYNPO/ACTN1/S100A1/FBXO32/PDLIM7/DST	26
CC	GO:0030016	myofibril	37/1515	224/19717	7.72936e-06	0.000238138	0.000191394	SORBS2/LMOD1/SYNE1/KY/NEB/NEXN/SYNM/ANK2/ANK3/MYH3/RYR2/CSRP2/FKBP1A/PDLIM3/SPTBN1/HDAC4/FHOD3/TIMP4/MYH15/PDLIM4/SDC4/RYR1/FLNA/KRT19/GLRX3/FHL3/BAG3/ENO1/AHNAK2/SYNPO/ACTN1/S100A1/CORO1C/FBXO32/PLEC/PDLIM7/DST	37
CC	GO:0030133	transport vesicle	55/1515	392/19717	1.00091e-05	0.000289533	0.0002327	ITPR1/DGKI/YIPF1/SYTL3/LGI3/CA4/SYT9/MAP6/CNST/WFS1/COPZ1/RASSF9/HAP1/SYP/COPZ2/DBH/TMEM168/RAB1A/DNAJC5/UNC13C/SLC2A8/TMED10/MYRIP/SYT12/HLA-B/SYTL5/CD74/BCL2L1/HLA-DRA/PAM/CD55/HLA-DQB2/HLA-A/HLA-DPA1/SYNGR3/HLA-C/SYTL1/TMEM184A/HLA-H/SYNGR2/HLA-DRB1/SYT1/HLA-G/SYN1/HLA-DPB1/STX3/SNAP25/HLA-DQB1/TGFA/B2M/PPT1/HLA-F/TMEM163/HLA-DQA1/CD59	55
CC	GO:0030666	endocytic vesicle membrane	30/1515	167/19717	1.02925e-05	0.000289533	0.0002327	CALR/WNT4/CD36/ATP6V0E2/FZD4/SMO/FCHO1/HLA-B/CD74/HLA-DRA/HLA-DQB2/HLA-A/HLA-DPA1/HLA-C/RAC2/HLA-H/RAB32/HLA-DRB1/HLA-G/TAP1/HLA-DPB1/HLA-DQB1/MARCO/CACNG4/B2M/LDLR/GPR161/HLA-F/TCIRG1/HLA-DQA1	30
CC	GO:0005788	endoplasmic reticulum lumen	46/1515	309/19717	1.14076e-05	0.000306073	0.000245994	HSP90B1/CALR/HYOU1/PDIA5/COL9A3/WNT4/HSPA5/PDIA4/PDIA6/PDIA3/COL4A6/COL25A1/CANX/ADAMTS5/DNAJC3/COL23A1/COL4A5/WFS1/DNAJB11/ARSK/MANF/SDF2L1/SDC2/F8/PDGFD/MIA3/FN1/SERPINA1/FAM20C/FSTL3/TIMP1/QSOX1/EBI3/COL8A2/CTSC/PLAUR/TMEM43/APOL1/C3/MFGE8/LGALS1/RDH5/TNC/PRSS23/B2M/ARSJ	46
CC	GO:0098589	membrane region	48/1515	328/19717	1.18266e-05	0.000306073	0.000245994	IRS1/GNAI1/ANK2/CHRNA7/KCNE3/TDGF1/CD36/HK1/ATP1A1/KCNQ1/LRP6/KDR/ITGA1/GPM6B/CD24/SMO/SDC4/ICAM1/PI4K2A/ANXA2/CTSD/LYN/TNFRSF1A/S100A10/ATP1B3/CD55/EHD2/DPP4/MYO1D/EMP2/NPC1/ADCY8/TGFBR1/HPSE/CARD11/FYN/FADD/ITGB2/ITGAM/OLR1/PPT1/CLIP3/CORO1C/PTK2B/RTN4R/SELPLG/RAP2B/STAT6	48
CC	GO:0062023	collagen-containing extracellular matrix	56/1515	406/19717	1.38445e-05	0.000344516	0.000276891	CDON/HSP90B1/CALR/FMOD/COL9A3/TECTA/ADAMTS3/MATN2/COL4A6/COL25A1/CRELD1/GDF10/ADAMTS5/COL23A1/COL4A5/SOD3/FREM2/SDC2/SFRP1/ANXA6/LAMB4/SMOC2/NCAM1/FGFR2/CTSH/FN1/SERPINA1/LGALS3/S100A6/LAD1/LAMB3/ICAM1/GDF15/TIMP1/ANXA2/ANXA1/CTSD/SDC3/COL8A2/CTSC/S100A10/ANXA2P2/MFGE8/LGALS1/TNC/CD151/SLPI/S100A4/TGM2/ANXA11/MDK/ENTPD2/CSTB/EMILIN2/CTSS/DST	56
CC	GO:1902495	transmembrane transporter complex	47/1515	324/19717	1.82977e-05	0.000424592	0.000341249	SHANK2/GRIN2C/KCNK2/DPP6/KCNAB1/GRIK4/TTYH2/CACNB4/CHRFAM7A/GABRB3/OLFM3/TRPC6/CLCNKB/CACNA2D2/CLCNKA/CHRNA7/LRRC7/KCNE3/ABCC8/RYR2/DLG2/KCNIP3/ABCB6/ATP1A1/KCNQ1/OLFM2/CLCC1/FKBP1A/KCNIP4/UNC80/CACNA2D3/KCNN4/SCN1B/KCNQ3/CTTN/GABRB2/RYR1/ATP1B3/SCNN1A/CLIC1/CATSPER1/HCN4/SNAP25/CACNG4/PTK2B/KCNJ2/CLDN4	47
CC	GO:0031300	intrinsic component of organelle membrane	53/1515	381/19717	1.83749e-05	0.000424592	0.000341249	CALR/HSPA5/PDIA3/EXT1/SYT9/CANX/TPST1/TMCO1/WFS1/CSGALNACT1/ELOVL1/SLC35B1/PEX11A/TEX261/TAPT1/SYP/ABCB6/SEC62/SPG7/SLC35B3/DNAJC5/BID/QSOX1/SCD/HLA-B/RYR1/TMEM43/CD74/HLA-DRA/HLA-DQB2/HLA-A/HLA-DPA1/HLA-C/NPC1/HLA-H/GRAMD1A/HLA-DRB1/SYT1/HLA-G/SYN1/TAP1/HLA-DPB1/RNF183/ANKLE2/HLA-DQB1/B2M/EDEM1/HLA-F/ECE1/TMEM163/HLA-DQA1/ESYT1/ELOVL7	53
CC	GO:0043292	contractile fiber	37/1515	234/19717	2.11096e-05	0.000470962	0.000378517	SORBS2/LMOD1/SYNE1/KY/NEB/NEXN/SYNM/ANK2/ANK3/MYH3/RYR2/CSRP2/FKBP1A/PDLIM3/SPTBN1/HDAC4/FHOD3/TIMP4/MYH15/PDLIM4/SDC4/RYR1/FLNA/KRT19/GLRX3/FHL3/BAG3/ENO1/AHNAK2/SYNPO/ACTN1/S100A1/CORO1C/FBXO32/PLEC/PDLIM7/DST	37
CC	GO:0016324	apical plasma membrane	46/1515	318/19717	2.40313e-05	0.000518276	0.000416543	SORBS2/SHANK2/KCNK2/MARVELD2/SLC29A4/SLC26A4/SLC5A8/LRP2/ANK2/CA4/ENPP3/TDGF1/CD36/ATP1A1/CNTFR/RAPGEF2/GJB6/DUOX2/DUOX1/RDX/SLC26A9/FN1/SPTBN2/SLC34A2/ANXA1/ERBB3/MUC1/SCNN1A/P2RY6/CLDN1/MSN/NOD1/DPP4/EMP2/ADCY8/SLC22A4/ATP6V1B2/SHROOM4/SLC3A2/STX3/HPN/CRB3/TCIRG1/CEACAM6/CLDN4/MUC20	46
CC	GO:0034702	ion channel complex	44/1515	301/19717	2.76441e-05	0.00057696	0.000463708	SHANK2/GRIN2C/KCNK2/DPP6/KCNAB1/GRIK4/TTYH2/CACNB4/CHRFAM7A/GABRB3/OLFM3/TRPC6/CLCNKB/CACNA2D2/CLCNKA/CHRNA7/LRRC7/KCNE3/ABCC8/RYR2/DLG2/KCNIP3/KCNQ1/OLFM2/CLCC1/FKBP1A/KCNIP4/UNC80/CACNA2D3/KCNN4/SCN1B/KCNQ3/CTTN/GABRB2/RYR1/SCNN1A/CLIC1/CATSPER1/HCN4/SNAP25/CACNG4/PTK2B/KCNJ2/CLDN4	44
CC	GO:0031674	I band	26/1515	143/19717	3.15106e-05	0.000621313	0.000499355	SORBS2/KY/NEB/NEXN/ANK2/ANK3/RYR2/CSRP2/FKBP1A/PDLIM3/HDAC4/FHOD3/PDLIM4/RYR1/FLNA/KRT19/GLRX3/FHL3/BAG3/AHNAK2/SYNPO/ACTN1/S100A1/FBXO32/PDLIM7/DST	26
CC	GO:0031301	integral component of organelle membrane	49/1515	350/19717	3.16899e-05	0.000621313	0.000499355	CALR/HSPA5/PDIA3/EXT1/SYT9/CANX/TPST1/TMCO1/WFS1/CSGALNACT1/ELOVL1/SLC35B1/PEX11A/TEX261/TAPT1/SYP/ABCB6/SEC62/SPG7/SLC35B3/BID/QSOX1/SCD/HLA-B/RYR1/TMEM43/CD74/HLA-DRA/HLA-DQB2/HLA-A/HLA-DPA1/HLA-C/NPC1/HLA-H/HLA-DRB1/SYT1/HLA-G/TAP1/HLA-DPB1/RNF183/ANKLE2/HLA-DQB1/B2M/EDEM1/HLA-F/TMEM163/HLA-DQA1/ESYT1/ELOVL7	49
CC	GO:1990351	transporter complex	47/1515	332/19717	3.43646e-05	0.000653338	0.000525094	SHANK2/GRIN2C/KCNK2/DPP6/KCNAB1/GRIK4/TTYH2/CACNB4/CHRFAM7A/GABRB3/OLFM3/TRPC6/CLCNKB/CACNA2D2/CLCNKA/CHRNA7/LRRC7/KCNE3/ABCC8/RYR2/DLG2/KCNIP3/ABCB6/ATP1A1/KCNQ1/OLFM2/CLCC1/FKBP1A/KCNIP4/UNC80/CACNA2D3/KCNN4/SCN1B/KCNQ3/CTTN/GABRB2/RYR1/ATP1B3/SCNN1A/CLIC1/CATSPER1/HCN4/SNAP25/CACNG4/PTK2B/KCNJ2/CLDN4	47
CC	GO:0030017	sarcomere	33/1515	204/19717	3.62042e-05	0.000653338	0.000525094	SORBS2/LMOD1/SYNE1/KY/NEB/NEXN/ANK2/ANK3/MYH3/RYR2/CSRP2/FKBP1A/PDLIM3/SPTBN1/HDAC4/FHOD3/TIMP4/PDLIM4/RYR1/FLNA/KRT19/GLRX3/FHL3/BAG3/ENO1/AHNAK2/SYNPO/ACTN1/S100A1/CORO1C/FBXO32/PDLIM7/DST	33
CC	GO:0019898	extrinsic component of membrane	43/1515	295/19717	3.63527e-05	0.000653338	0.000525094	GNA14/AAK1/KCNAB1/DGKI/SYTL3/GNAI1/CYTH3/TDGF1/RGS8/NUMB/CNTFR/OLFM2/FKBP1A/SOCS2/COQ7/CDHR3/PIK3R3/GNAL/SCUBE1/GNG7/S100A6/ST14/STAC/ANXA2/ANXA1/LYN/S100A10/ALOX15B/PRSS22/PLAUR/PLEKHA4/CDH3/EHD2/MFGE8/SYTL1/GRAMD1A/FYN/SYN1/SNAP25/GNA15/CDH11/PTK2B/ESYT1	43
CC	GO:0030135	coated vesicle	42/1515	289/19717	4.77906e-05	0.000835689	0.000671651	AAK1/LMAN2L/LRP2/SYT9/COPZ1/RASSF9/TEX261/COPZ2/NUMB/F8/FZD4/VPS16/TMED4/DNAJC5/SLC2A8/TMED10/SERPINA1/FCHO1/HLA-B/CTSC/DVL1/SFTPB/CD74/HLA-DRA/HLA-DQB2/HLA-A/HLA-DPA1/HLA-C/HLA-H/ADCY8/HLA-DRB1/SYT1/HLA-G/HLA-DPB1/HLA-DQB1/TGFA/B2M/LDLR/HLA-F/ECE1/HLA-DQA1/CD59	42
CC	GO:0030662	coated vesicle membrane	30/1515	182/19717	5.62533e-05	0.000957786	0.000769782	LRP2/SYT9/COPZ1/RASSF9/COPZ2/FZD4/DNAJC5/SLC2A8/TMED10/FCHO1/HLA-B/CD74/HLA-DRA/HLA-DQB2/HLA-A/HLA-DPA1/HLA-C/HLA-H/ADCY8/HLA-DRB1/SYT1/HLA-G/HLA-DPB1/HLA-DQB1/TGFA/B2M/LDLR/HLA-F/HLA-DQA1/CD59	30
CC	GO:0045335	phagocytic vesicle	24/1515	132/19717	6.25315e-05	0.00103738	0.000833753	CALR/PDIA3/CD36/ATP6V0E2/CDC42EP2/HLA-B/GSN/ZYX/HLA-A/HLA-C/RAC2/HLA-H/RAB32/HLA-G/SRGAP2/TAP1/FMNL1/ANXA11/B2M/GNLY/PLD4/HLA-F/TCIRG1/NCF2	24
CC	GO:0010008	endosome membrane	61/1515	479/19717	6.59742e-05	0.00106713	0.000857664	SLC26A7/YIPF1/MTMR4/KIAA1324/PDIA3/AQP4/HSD17B6/NDFIP1/GRB14/ABCB6/ATP6V0E2/SNX4/TRAF6/LRP6/OCA2/ANXA6/VPS16/RFFL/PDLIM4/RCC2/ANXA2/RNF144A/ANXA1/HLA-B/CTSD/SNX8/SPHK1/HLA-DRA/BAIAP3/EHD2/HLA-DQB2/LLGL1/HLA-A/CLEC16A/HLA-DPA1/HLA-C/NPC1/TMEM184A/HLA-H/OPTN/HLA-DRB1/ARF6/HLA-G/HLA-DMA/HLA-DPB1/STAM/HLA-DOA/HLA-DQB1/B2M/PLEKHM2/CLIP3/LDLR/CORO1C/HLA-F/TCIRG1/ECE1/HGS/RAP2B/TMEM163/HLA-DQA1/ZNRF2	61
CC	GO:0005884	actin filament	56/1515	431/19717	7.52786e-05	0.00118793	0.000954753	SHANK2/LMOD1/SLC26A4/IQGAP2/LRP2/WWOX/CA4/GPM6A/INPPL1/CD36/CD302/SLC27A4/LIMCH1/DNALI1/PDLIM3/RDX/MYO10/FLII/PDLIM4/NPTXR/SLC34A2/CTTN/ITGA3/ANXA1/PALM/MST1R/FLNA/TUBB3/SRCIN1/MSN/MAP2/AMOT/ZYX/VASP/MYO1D/SYTL1/RAC2/ESPN/FHL3/BAG3/CLIC1/ARF6/HLA-G/ATP6V1B2/FYN/MYO1G/MYH14/SHROOM4/PSTPIP2/GAP43/SYNPO/ACTN1/LCP1/PLEC/PDLIM7/MUC20	56
CC	GO:0005793	endoplasmic reticulum-Golgi intermediate compartment	23/1515	126/19717	8.27709e-05	0.00126618	0.00101764	LMAN2L/CALR/MPPE1/HSPA5/PDIA6/NUCB2/CA4/GORASP1/COPZ2/F8/DICER1/TMED4/TMED10/MGAT4B/FN1/SERPINA1/CTSC/CD55/STK17B/TAP1/TGFA/CNIH4/CD59	23
CC	GO:0031252	cell leading edge	53/1515	403/19717	8.45492e-05	0.00126618	0.00101764	SORBS2/AAK1/WASF3/KSR1/IQGAP2/CYTH3/SH3RF1/SLC1A2/SLC39A14/LAYN/INPPL1/DUOXA2/ARHGEF4/DUOX2/TLN2/DUOX1/SPTBN1/RDX/MYO10/PDLIM4/S100A11/S100A6/TNFRSF12A/CTTN/ANXA2/FAM89B/PALM/SH3BP1/IFIT5/TUBB3/ITGB4/SRCIN1/GSN/ADORA1/AMOT/DPP4/VASP/MYO1D/RAC2/PDE9A/CDC42BPG/ARF6/KLHL2/ATP6V1B2/SRGAP2/MYO1G/STX3/ACTN1/LCP1/CORO1C/PTK2B/PDLIM7/DST	53
CC	GO:0042581	specific granule	27/1515	160/19717	8.61082e-05	0.00126618	0.00101764	MLEC/LRRC7/CD36/DNAJC5/ALDH3B1/TMC6/CHI3L1/LCN2/QSOX1/CTSD/PLAUR/SLPI/LRG1/HPSE/OSCAR/CLEC5A/SLC15A4/STX3/SNAP25/ANXA11/ITGB2/ITGAM/B2M/OLR1/PLAU/RAP2B/CD59	27
CC	GO:0045177	apical part of cell	51/1515	384/19717	8.88353e-05	0.00127725	0.00102654	SORBS2/SHANK2/KCNK2/MARVELD2/SLC29A4/SLC26A4/SLC5A8/LRP2/ANK2/CA4/ENPP3/TDGF1/CD36/DUOXA2/ATP1A1/NUMB/CNTFR/RAPGEF2/GJB6/LGMN/DUOX2/DUOX1/RDX/SLC26A9/FN1/SPTBN2/SLC34A2/ANXA1/IFIT5/ERBB3/MUC1/SCNN1A/P2RY6/CLDN1/MSN/NOD1/DPP4/EMP2/ADCY8/SLC22A4/ATP6V1B2/SHROOM4/SLC3A2/STX3/HPN/CRB3/LDLR/TCIRG1/CEACAM6/CLDN4/MUC20	51
CC	GO:0030175	filopodium	20/1515	104/19717	0.000112156	0.00157749	0.00126785	IQGAP2/GPM6A/INPPL1/CD302/DNALI1/RDX/MYO10/NPTXR/ITGA3/PALM/TUBB3/SRCIN1/MSN/MAP2/VASP/ARF6/HLA-G/MYO1G/GAP43/LCP1	20
CC	GO:0055038	recycling endosome membrane	17/1515	81/19717	0.000117983	0.00162415	0.00130535	SLC26A7/PDIA3/RFFL/PDLIM4/HLA-B/BAIAP3/EHD2/HLA-A/HLA-C/HLA-H/OPTN/ARF6/HLA-G/B2M/CLIP3/HLA-F/RAP2B	17
CC	GO:0030660	Golgi-associated vesicle membrane	21/1515	114/19717	0.000145008	0.00195459	0.00157092	COPZ1/RASSF9/COPZ2/TMED10/HLA-B/CD74/HLA-DRA/HLA-DQB2/HLA-A/HLA-DPA1/HLA-C/HLA-H/HLA-DRB1/HLA-G/HLA-DPB1/HLA-DQB1/TGFA/B2M/HLA-F/HLA-DQA1/CD59	21
CC	GO:0098852	lytic vacuole membrane	47/1515	355/19717	0.000177613	0.00234521	0.00188487	CYB561/GNAI1/KIAA1324/LRP2/CLN5/MAGT1/DDOST/SLC39A11/VLDLR/OCA2/ANXA6/VPS16/TM9SF1/TMEM150C/DNAJC5/SLC2A8/PI4K2A/ANXA2/TMEM79/CTSD/DRAM1/VASN/CTSA/CD74/HLA-DRA/HLA-DQB2/CLEC16A/HLA-DPA1/DPP4/NPC1/HLA-H/HPSE/HLA-DRB1/ATP6V1B2/SLC15A4/HLA-DMA/HLA-DPB1/RNF183/HLA-DOA/HLA-DQB1/LDLR/HLA-F/TCIRG1/CEACAM6/ECE1/HLA-DQA1/ZNRF2	47
CC	GO:0032432	actin filament bundle	34/1515	231/19717	0.000188735	0.00244223	0.00196284	SHANK2/SLC26A4/IQGAP2/LRP2/WWOX/CA4/CD36/CD302/SLC27A4/LIMCH1/PDLIM3/RDX/FLII/PDLIM4/SLC34A2/MST1R/MSN/ZYX/MYO1D/SYTL1/ESPN/FHL3/BAG3/CLIC1/ATP6V1B2/MYO1G/MYH14/SHROOM4/SYNPO/ACTN1/LCP1/PLEC/PDLIM7/MUC20	34
CC	GO:0005798	Golgi-associated vesicle	28/1515	178/19717	0.000221756	0.00281326	0.00226104	LMAN2L/MAP6/COPZ1/RASSF9/TEX261/COPZ2/F8/TMED4/TMED10/SERPINA1/HLA-B/CTSC/CD74/HLA-DRA/HLA-DQB2/HLA-A/HLA-DPA1/HLA-C/HLA-H/HLA-DRB1/HLA-G/HLA-DPB1/HLA-DQB1/TGFA/B2M/HLA-F/HLA-DQA1/CD59	28
CC	GO:0031527	filopodium membrane	7/1515	18/19717	0.000232872	0.00289746	0.00232872	MYO10/ITGA3/PALM/VASP/ARF6/HLA-G/GAP43	7
CC	GO:0070160	tight junction	22/1515	128/19717	0.000287367	0.00350805	0.00281945	MARVELD2/CGNL1/ESAM/CYTH3/ANK3/MAGI1/MAGI2/RAPGEF2/MAGI3/TACSTD2/SH3BP1/LSR/CLDN10/CLDN1/AMOT/CLDN7/VASP/TGFBR1/SYNPO/CRB3/RAP2B/CLDN4	22
CC	GO:0005765	lysosomal membrane	46/1515	354/19717	0.000316847	0.0037963	0.00305112	CYB561/GNAI1/KIAA1324/LRP2/CLN5/MAGT1/DDOST/VLDLR/OCA2/ANXA6/VPS16/TM9SF1/TMEM150C/DNAJC5/SLC2A8/PI4K2A/ANXA2/TMEM79/CTSD/DRAM1/VASN/CTSA/CD74/HLA-DRA/HLA-DQB2/CLEC16A/HLA-DPA1/DPP4/NPC1/HLA-H/HPSE/HLA-DRB1/ATP6V1B2/SLC15A4/HLA-DMA/HLA-DPB1/RNF183/HLA-DOA/HLA-DQB1/LDLR/HLA-F/TCIRG1/CEACAM6/ECE1/HLA-DQA1/ZNRF2	46
CC	GO:0043034	costamere	7/1515	19/19717	0.000344347	0.00402098	0.0032317	SYNM/ANK2/ANK3/SDC4/KRT19/AHNAK2/PLEC	7
CC	GO:0005911	cell-cell junction	52/1515	416/19717	0.000348029	0.00402098	0.0032317	KIT/FLRT1/MARVELD2/CGNL1/FBF1/SYNM/ANK2/ESAM/CYTH3/TRPC6/ANK3/LRRC7/GJB1/MAGI1/MAGI2/ATP1A1/FZD4/RAPGEF2/GJB6/MAGI3/TMEM47/SCN1B/TACSTD2/PTPRU/WTIP/GJB3/SH3BP1/PERP/FLNA/LSR/FRMD5/DSC2/PKP2/CLDN10/CLDN1/CDSN/AMOT/CLDN7/DPP4/VASP/TGFBR1/SHROOM4/STX3/HPN/SYNPO/ACTN1/YWHAH/CRB3/IQGAP3/KCNJ2/RAP2B/CLDN4	52
CC	GO:0034703	cation channel complex	32/1515	220/19717	0.000356114	0.00404221	0.00324876	GRIN2C/KCNK2/DPP6/KCNAB1/GRIK4/CACNB4/OLFM3/TRPC6/CACNA2D2/KCNE3/ABCC8/RYR2/DLG2/KCNIP3/KCNQ1/OLFM2/FKBP1A/KCNIP4/UNC80/CACNA2D3/KCNN4/SCN1B/KCNQ3/CTTN/RYR1/SCNN1A/CATSPER1/HCN4/SNAP25/CACNG4/PTK2B/KCNJ2	32
CC	GO:0030669	clathrin-coated endocytic vesicle membrane	11/1515	44/19717	0.000381306	0.00425353	0.0034186	FZD4/FCHO1/CD74/HLA-DRA/HLA-DQB2/HLA-DPA1/HLA-DRB1/HLA-DPB1/HLA-DQB1/LDLR/HLA-DQA1	11
CC	GO:0005923	bicellular tight junction	21/1515	123/19717	0.000428832	0.00470261	0.00377953	MARVELD2/CGNL1/ESAM/CYTH3/ANK3/MAGI1/MAGI2/RAPGEF2/MAGI3/TACSTD2/SH3BP1/CLDN10/CLDN1/AMOT/CLDN7/VASP/TGFBR1/SYNPO/CRB3/RAP2B/CLDN4	21
CC	GO:0005774	vacuolar membrane	51/1515	412/19717	0.000496149	0.00535014	0.00429995	CYB561/GNAI1/KIAA1324/LRP2/CLN5/MAGT1/DDOST/SLC39A11/VLDLR/MAP1LC3A/ABCB6/OCA2/ANXA6/VPS16/TM9SF1/CALCOCO2/TMEM150C/DNAJC5/SLC2A8/PI4K2A/ANXA2/TMEM79/CTSD/DRAM1/VASN/CTSA/CD74/HLA-DRA/HLA-DQB2/CLEC16A/HLA-DPA1/DPP4/NPC1/HLA-H/HPSE/HLA-DRB1/ATP6V1B2/SLC15A4/HLA-DMA/HLA-DPB1/RNF183/HLA-DOA/HLA-DQB1/LDLR/HLA-F/TCIRG1/CEACAM6/ECE1/ABCC3/HLA-DQA1/ZNRF2	51
CC	GO:0031234	extrinsic component of cytoplasmic side of plasma membrane	17/1515	91/19717	0.000508122	0.00538943	0.00433153	GNA14/KCNAB1/GNAI1/CYTH3/RGS8/GNAL/GNG7/S100A6/STAC/LYN/PLEKHA4/GRAMD1A/FYN/SNAP25/GNA15/PTK2B/ESYT1	17
CC	GO:0043296	apical junction complex	23/1515	143/19717	0.000565204	0.00589818	0.00474042	MARVELD2/CGNL1/FBF1/ESAM/CYTH3/ANK3/MAGI1/MAGI2/RAPGEF2/MAGI3/TACSTD2/SH3BP1/CLDN10/CLDN1/AMOT/CLDN7/VASP/TGFBR1/SHROOM4/SYNPO/CRB3/RAP2B/CLDN4	23
CC	GO:0042383	sarcolemma	22/1515	136/19717	0.000680767	0.00699137	0.00561903	SYNM/ANK2/AQP4/ANK3/ABCC8/RYR2/ATP1A1/RDX/SCN1B/STAC/ANXA2/ANXA1/STBD1/RYR1/KRT19/SLC27A6/PDE9A/AHNAK2/CACNG4/CORO1C/KCNJ2/PLEC	22
CC	GO:0009898	cytoplasmic side of plasma membrane	24/1515	154/19717	0.000692014	0.00699583	0.00562261	KIT/GNA14/KCNAB1/ATP2C2/GNAI1/CACNB4/CYTH3/RGS8/TRAF6/GNAL/GNG7/NPTXR/S100A6/STAC/PALM/LYN/PLEKHA4/GRAMD1A/FYN/SHROOM4/SNAP25/GNA15/PTK2B/ESYT1	24
CC	GO:0005790	smooth endoplasmic reticulum	9/1515	34/19717	0.00082058	0.00801042	0.00643805	CALR/HYOU1/HSPA5/CANX/DNAJC3/RYR2/RYR1/MYO1D/KCNJ2	9
CC	GO:0009925	basal plasma membrane	9/1515	34/19717	0.00082058	0.00801042	0.00643805	ANK3/OSCP1/TACSTD2/MET/ERBB3/SHROOM4/CLDN4/MUC20/DST	9
CC	GO:0034663	endoplasmic reticulum chaperone complex	5/1515	11/19717	0.000829518	0.00801042	0.00643805	HSP90B1/HYOU1/HSPA5/PDIA6/SDF2L1	5
CC	GO:0005604	basement membrane	17/1515	95/19717	0.000847209	0.00806095	0.00647866	MATN2/COL4A6/COL4A5/FREM2/LAMB4/SMOC2/FN1/LAD1/LAMB3/TIMP1/ANXA2/COL8A2/ANXA2P2/TNC/CD151/ENTPD2/DST	17
CC	GO:0031901	early endosome membrane	23/1515	149/19717	0.00101129	0.00948266	0.00762131	MTMR4/HSD17B6/SNX4/LRP6/PDLIM4/RCC2/ANXA1/HLA-B/SNX8/SPHK1/LLGL1/HLA-A/HLA-C/TMEM184A/HLA-H/ARF6/HLA-G/STAM/B2M/CLIP3/HLA-F/HGS/TMEM163	23
CC	GO:0098858	actin-based cell projection	38/1515	293/19717	0.00104441	0.00965336	0.0077585	SHANK2/SLC26A4/IQGAP2/LRP2/WWOX/CA4/GPM6A/INPPL1/CD36/CD302/SLC27A4/DNALI1/RDX/MYO10/FLII/NPTXR/SLC34A2/ITGA3/PALM/TUBB3/SRCIN1/MSN/MAP2/VASP/MYO1D/SYTL1/ESPN/CLIC1/ARF6/HLA-G/ATP6V1B2/MYO1G/MYH14/GAP43/ACTN1/LCP1/PLEC/MUC20	38
CC	GO:0005811	lipid droplet	15/1515	81/19717	0.0011658	0.0106236	0.00853828	STARD13/METTL7A/TMEM135/ADIG/FABP4/TRAF6/LMLN/LPCAT2/FAF2/ANXA2/HSD3B7/SYNGR2/G0S2/DHRS3/PNPLA5	15
CC	GO:0030665	clathrin-coated vesicle membrane	19/1515	115/19717	0.00118517	0.0106501	0.00855955	LRP2/SYT9/RASSF9/FZD4/DNAJC5/SLC2A8/FCHO1/CD74/HLA-DRA/HLA-DQB2/HLA-DPA1/ADCY8/HLA-DRB1/SYT1/HLA-DPB1/HLA-DQB1/TGFA/LDLR/HLA-DQA1	19
CC	GO:0030667	secretory granule membrane	38/1515	298/19717	0.00142739	0.0126509	0.0101677	ITPR1/MLEC/IQGAP2/CA4/SYT9/MAGT1/DDOST/CD36/RND2/DBH/DNAJC5/TMED10/ALDH3B1/TMC6/LGALS3/CD58/STBD1/PLAUR/PAM/CD55/TMEM184A/HLA-H/SYT1/FCGR2A/CLEC5A/SLC15A4/STX3/SNAP25/ITGB2/ITGAM/OLR1/RHOG/PLAU/TYROBP/TCIRG1/CEACAM6/RAP2B/CD59	38
CC	GO:0001725	stress fiber	13/1515	67/19717	0.00156315	0.0134848	0.0108378	LIMCH1/PDLIM3/PDLIM4/MST1R/ZYX/FHL3/BAG3/MYH14/SHROOM4/SYNPO/ACTN1/LCP1/PDLIM7	13
CC	GO:0097517	contractile actin filament bundle	13/1515	67/19717	0.00156315	0.0134848	0.0108378	LIMCH1/PDLIM3/PDLIM4/MST1R/ZYX/FHL3/BAG3/MYH14/SHROOM4/SYNPO/ACTN1/LCP1/PDLIM7	13
CC	GO:0032588	trans-Golgi network membrane	16/1515	92/19717	0.00162357	0.0138217	0.0111086	AP4S1/ATP7B/COG5/TMEM79/CD74/HLA-DRA/BAIAP3/HLA-DQB2/LLGL1/HLA-DPA1/HLA-DRB1/HLA-DPB1/HLA-DQB1/CLIP3/PLD4/HLA-DQA1	16
CC	GO:0070820	tertiary granule	24/1515	164/19717	0.00168934	0.0141251	0.0113525	METTL7A/CTSH/TMC6/LGALS3/CD58/QSOX1/STBD1/CTSD/CD55/FTH1/LRG1/OSCAR/CLEC5A/SNAP25/ITGB2/ITGAM/B2M/OLR1/PLAU/CSTB/TCIRG1/RAP2B/CTSS/CD59	24
CC	GO:0030315	T-tubule	11/1515	52/19717	0.00170287	0.0141251	0.0113525	ANK2/ANK3/ATP1A1/RDX/SCN1B/STAC/STBD1/RYR1/AHNAK2/CACNG4/KCNJ2	11
CC	GO:0005802	trans-Golgi network	31/1515	236/19717	0.00236287	0.0193516	0.015553	YIPF1/KIAA1324/CA4/SLC10A7/CNST/GOLGA1/AP4S1/ATP7B/TRAPPC6A/COG5/ARL5A/PI4K2A/TMEM79/ARAP1/CD74/HLA-DRA/GOLT1A/BAIAP3/PAM/HLA-DQB2/LLGL1/HLA-DPA1/OPTN/RAB32/HLA-DRB1/HLA-DPB1/SNAP25/HLA-DQB1/CLIP3/PLD4/HLA-DQA1	31
CC	GO:0098562	cytoplasmic side of membrane	25/1515	178/19717	0.00243662	0.0197061	0.015838	KIT/GNA14/KCNAB1/ATP2C2/GNAI1/CACNB4/CYTH3/RGS8/TRAF6/FKBP1A/GNAL/GNG7/NPTXR/S100A6/STAC/PALM/LYN/PLEKHA4/GRAMD1A/FYN/SHROOM4/SNAP25/GNA15/PTK2B/ESYT1	25
CC	GO:0030136	clathrin-coated vesicle	26/1515	188/19717	0.00251291	0.0198929	0.0159881	AAK1/LRP2/SYT9/RASSF9/NUMB/FZD4/VPS16/DNAJC5/SLC2A8/TMED10/FCHO1/DVL1/SFTPB/CD74/HLA-DRA/HLA-DQB2/HLA-DPA1/ADCY8/HLA-DRB1/SYT1/HLA-DPB1/HLA-DQB1/TGFA/LDLR/ECE1/HLA-DQA1	26
CC	GO:0098978	glutamatergic synapse	42/1515	349/19717	0.00253442	0.0198929	0.0159881	GRIN2C/DGKI/WASF3/MAPK10/CANX/OPHN1/SLC1A2/GPM6A/DLG2/ARHGAP22/LRRC4C/NUMB/LRRTM2/FZD4/OLFM2/SPTBN1/ADAM22/USP46/ABR/NPTXR/SPTBN2/LYN/FLNA/DVL1/PPP1R1B/IL1RAP/ARPC5L/ADCY8/DLGAP4/SYT1/ARF6/FYN/STX3/SNAP25/CACNG4/SYNPO/ACTN1/CDH11/PTK2B/ACTBL2/RTN4R/LRFN4	42
CC	GO:0034705	potassium channel complex	16/1515	96/19717	0.00255314	0.0198929	0.0159881	KCNK2/DPP6/KCNAB1/GRIK4/KCNE3/ABCC8/DLG2/KCNIP3/KCNQ1/KCNIP4/KCNN4/KCNQ3/CTTN/HCN4/SNAP25/KCNJ2	16
CC	GO:0042641	actomyosin	14/1515	79/19717	0.0025827	0.0198929	0.0159881	LIMCH1/PDLIM3/HDAC4/PDLIM4/MST1R/ZYX/FHL3/BAG3/MYH14/SHROOM4/SYNPO/ACTN1/LCP1/PDLIM7	14
CC	GO:0045334	clathrin-coated endocytic vesicle	12/1515	63/19717	0.00274679	0.0209079	0.0168039	FZD4/FCHO1/SFTPB/CD74/HLA-DRA/HLA-DQB2/HLA-DPA1/HLA-DRB1/HLA-DPB1/HLA-DQB1/LDLR/HLA-DQA1	12
CC	GO:0031904	endosome lumen	8/1515	34/19717	0.00355837	0.0267705	0.0215157	LRP2/AP4S1/LGMN/PDLIM4/CTSH/SFTPB/B2M/CTSS	8
CC	GO:0016328	lateral plasma membrane	11/1515	57/19717	0.00365528	0.0271835	0.0218476	ANK3/GJB1/TACSTD2/ANXA1/ERBB3/DVL1/CLDN1/AXIN1/IQGAP3/CORO1C/CLDN4	11
CC	GO:0035579	specific granule membrane	15/1515	91/19717	0.00381786	0.02807	0.0225601	MLEC/CD36/DNAJC5/ALDH3B1/TMC6/PLAUR/CLEC5A/SLC15A4/SNAP25/ITGB2/ITGAM/OLR1/PLAU/RAP2B/CD59	15
CC	GO:0043025	neuronal cell body	55/1515	497/19717	0.00398629	0.028979	0.0232907	SHANK2/KCNK2/KCNAB1/DGKI/FLRT1/MAPK10/CANX/KCNE3/GPM6A/PPARGC1A/RGS8/SNPH/TTLL7/KIF5A/CKB/EPHA5/RAPGEF2/LRP6/VPS16/MPL/FKBP4/GLUL/ITGA1/ERCC8/MYO10/TNN/KCNN4/SCN1B/NPTXR/SPTBN2/PI4K2A/RIN1/CAMK2N1/FLNA/DVL1/PPP1R1B/SRCIN1/MAP2/PAM/ADORA1/MYO1D/PDE9A/ADCY8/SIAH2/CNN3/MAP1S/ELK1/HPN/SYNPO/PPT1/PTPRF/PTK2B/KCNJ2/RTN4R/PLK3	55
CC	GO:0005902	microvillus	23/1515	167/19717	0.00453741	0.0326189	0.0262161	SHANK2/SLC26A4/IQGAP2/LRP2/WWOX/CA4/CD36/CD302/SLC27A4/RDX/FLII/SLC34A2/MSN/MYO1D/SYTL1/ESPN/CLIC1/ATP6V1B2/MYO1G/MYH14/ACTN1/PLEC/MUC20	23
CC	GO:0045178	basal part of cell	10/1515	51/19717	0.00486228	0.0345703	0.0277844	ANK3/OSCP1/ITGA1/TACSTD2/MET/ERBB3/SHROOM4/CLDN4/MUC20/DST	10
CC	GO:0030670	phagocytic vesicle membrane	13/1515	76/19717	0.00495106	0.0348189	0.0279842	CALR/ATP6V0E2/HLA-B/HLA-A/HLA-C/RAC2/HLA-H/RAB32/HLA-G/TAP1/B2M/HLA-F/TCIRG1	13
CC	GO:0150034	distal axon	37/1515	310/19717	0.00503998	0.0350631	0.0281806	SHANK2/KCNK2/AAK1/DGKI/GRIK4/SYT9/OPHN1/GPM6A/SYP/KCNIP3/LRRTM2/DICER1/NDRG2/FKBP4/GLUL/UNC13C/TNN/NPTXR/SYT12/CTTN/ITGA3/NGEF/TUBB3/DVL1/MAP2/ADORA1/RASGRF1/ADCY8/BASP1/SYT1/MYH14/STX3/SNAP25/ELK1/GAP43/PTK2B/RTN4R	37
CC	GO:0044304	main axon	12/1515	68/19717	0.00526004	0.0360078	0.0289398	KCNAB1/ANK2/ANK3/SLC1A2/LRRC7/DLG2/SPTBN1/SCN1B/KCNQ3/MAP2/ADORA1/MYO1D	12
CC	GO:0098984	neuron to neuron synapse	41/1515	353/19717	0.00528709	0.0360078	0.0289398	ITPR1/SHANK2/GRIN2C/DGKI/GRIK4/ARHGEF9/PCLO/SYT9/ANKS1B/LRRC7/DLG2/NETO2/MAGI2/LRRC4C/ATP1A1/LRRTM2/HNRNPA3/SPTBN1/ADAM22/ABR/SYT12/CAMK2N1/PALM/LYN/DVL1/PPP1R1B/SRCIN1/MAP2/ADORA1/ADCY8/MAP4/CNN3/SYT1/SRGAP2/FYN/SYN1/CACNG4/GAP43/SYNPO/PTK2B/LRFN4	41
CC	GO:0008076	voltage-gated potassium channel complex	14/1515	87/19717	0.00633427	0.0426904	0.0343107	KCNK2/DPP6/KCNAB1/KCNE3/DLG2/KCNIP3/KCNQ1/KCNIP4/KCNN4/KCNQ3/CTTN/HCN4/SNAP25/KCNJ2	14
CC	GO:0001726	ruffle	23/1515	172/19717	0.00650576	0.0433941	0.0348762	KSR1/CYTH3/LAYN/ARHGEF4/TLN2/RDX/MYO10/S100A11/S100A6/TNFRSF12A/CTTN/ANXA2/IFIT5/GSN/AMOT/PDE9A/ARF6/KLHL2/ATP6V1B2/ACTN1/LCP1/CORO1C/PDLIM7	23
CC	GO:0030027	lamellipodium	25/1515	193/19717	0.00704587	0.0465171	0.0373862	SORBS2/WASF3/IQGAP2/SH3RF1/SLC39A14/INPPL1/RDX/MYO10/PDLIM4/CTTN/FAM89B/SH3BP1/TUBB3/SRCIN1/GSN/AMOT/DPP4/VASP/RAC2/KLHL2/SRGAP2/MYO1G/STX3/CORO1C/PTK2B	25
CC	GO:0033116	endoplasmic reticulum-Golgi intermediate compartment membrane	12/1515	71/19717	0.00748213	0.048677	0.0391222	CALR/MPPE1/GORASP1/COPZ2/F8/TMED10/SERPINA1/CTSC/CD55/TAP1/TGFA/CD59	12
CC	GO:0097440	apical dendrite	5/1515	17/19717	0.00753152	0.048677	0.0391222	PPARGC1A/FLNA/MAP2/MYO1D/PTK2B	5
CC	GO:0005769	early endosome	40/1515	350/19717	0.00759873	0.048677	0.0391222	MAGEL2/MTMR4/ANK2/LIPG/HSD17B6/KCNQ1/NUMB/SNX4/LRP6/KDR/ARRDC4/VPS16/RND2/RAB1A/PDLIM4/RCC2/ANXA2/ANXA1/HLA-B/SNX8/SPHK1/LLGL1/HLA-A/MYO1D/HLA-C/TMEM184A/HLA-H/SIAH2/RAB32/ARF6/HLA-G/STAM/RASGEF1B/B2M/CLIP3/PTP4A3/LDLR/HLA-F/HGS/TMEM163	40
CC	GO:0016528	sarcoplasm	13/1515	80/19717	0.0076896	0.0487762	0.0392019	ITPR1/HSP90B1/CALR/ANK3/RYR2/MANF/AGL/FKBP1A/MEF2C/RYR1/GSN/S100A1/PLEC	13
CC	GO:0005938	cell cortex	36/1515	308/19717	0.00777155	0.0488174	0.039235	RIC8B/BFSP1/GNAI1/PCLO/DSTN/CD302/TRAF6/RND2/SPTBN1/RDX/UNC13C/MYO10/MYRIP/FGFR2/SPTBN2/CTTN/ANXA2/SH3BP1/RYR1/RTKN/FLNA/KRT19/GSN/LLGL1/MYO1D/GLRX3/ARF6/ENO1/SHROOM4/FMNL1/RHOG/RND3/CORO1C/PTK2B/LASP1/DST	36
CC	GO:0008305	integrin complex	7/1515	31/19717	0.0079697	0.0495808	0.0398485	ITGA1/ITGA3/LYN/ITGB4/ITGB8/ITGB2/ITGAM	7
MF	GO:0042605	peptide antigen binding	13/1461	31/17697	3.93351e-07	0.000350211	0.000321837	HLA-B/HLA-DRA/HLA-A/HLA-DPA1/HLA-C/HLA-H/HLA-DRB1/HLA-G/TAP1/HLA-DPB1/HLA-DQB1/HLA-F/HLA-DQA1	13
MF	GO:0003779	actin binding	66/1461	431/17697	6.89392e-07	0.000350211	0.000321837	LMOD1/SYNE1/PKNOX2/PRKCE/WASF3/IQGAP2/CORO2B/NEB/NEXN/TRPC6/OPHN1/MYH3/DSTN/MYO1H/INPPL1/TNS1/CLMN/LIMCH1/ABLIM2/ANXA6/VPS16/TLN2/PDLIM3/SPTBN1/RDX/FHOD3/MYO10/IMPACT/MYRIP/MYH15/FLII/PDLIM4/SPTBN2/CTTN/INF2/FLNA/TMSB10/MSN/GSN/MICAL2/VASP/MYO1D/ARPC5L/ESPN/ADCY8/FHL3/CNN3/KLHL2/S100A4/SYN1/MYO1G/MYH14/SHROOM4/FMNL1/PSTPIP2/MAP1S/ARPC1B/SYNPO/ACTN1/YWHAH/LCP1/CORO1C/PLEC/LASP1/PDLIM7/DST	66
MF	GO:0005516	calmodulin binding	34/1461	200/17697	4.12059e-05	0.012496	0.0114836	CTH/IQGAP2/RGS16/PHKB/MYH3/IQCG/MAP6/ENKUR/SPATA17/WFS1/FBXL2/RYR2/KCNQ1/SPTBN1/UNC13C/TRPV6/MYO10/MYH15/KCNN4/KCNQ3/MAPKAPK3/RYR1/SPHK1/ITPKC/MAP2/MYO1D/ADCY8/MAPKAPK2/CNN3/SYT1/MYO1G/MYH14/GAP43/IQGAP3	34
MF	GO:0032395	MHC class II receptor activity	6/1461	10/17697	4.91968e-05	0.012496	0.0114836	HLA-DRA/HLA-DQB2/HLA-DPA1/HLA-DOA/HLA-DQB1/HLA-DQA1	6
MF	GO:0046873	metal ion transmembrane transporter activity	66/1461	497/17697	7.8731e-05	0.0141645	0.0130169	ITPR1/SLC4A4/GRIN2C/KCNK2/DPP6/KCNJ13/KCNAB1/GRIK4/KCNK16/FGF12/ATP2C2/TRPM3/SLC5A8/CACNB4/TRPC6/MAGT1/CACNA2D2/CHRNA7/SLC1A2/TMCO1/SLC39A14/KCNE3/GPM6A/SLC20A2/ABCC8/SLC39A7/RYR2/SGK1/GPD1L/SLC39A11/KCNIP3/KCNK17/SLC24A3/ATP1A1/KCNQ1/KCNK3/MRS2/FAM155B/SLC39A9/ANXA6/SLC10A4/ATP7B/KCNIP4/TRPV6/CACNA2D3/KCNN4/SCN1B/SLC34A2/KCNQ3/ANXA2/RYR1/FLNA/ANXA2P2/ATP1B3/PKP2/SCNN1A/SLC20A1/CATSPER1/HCN4/SLC3…	66
MF	GO:0044548	S100 protein binding	7/1461	15/17697	9.16002e-05	0.0141645	0.0130169	KCNK3/S100A11/S100A6/ANXA2/ANXA2P2/ANXA11/S100A1	7
MF	GO:0048306	calcium-dependent protein binding	15/1461	61/17697	9.75899e-05	0.0141645	0.0130169	WFS1/VLDLR/ANXA6/S100A11/S100A6/ANXA2/ANXA1/PLSCR3/MYO1D/SYT1/S100A4/SYN1/SNAP25/ANXA11/S100A1	15
MF	GO:0042289	MHC class II protein binding	7/1461	16/17697	0.000151249	0.017226	0.0158304	CD74/HLA-DRA/HLA-DQB2/HLA-DPA1/HLA-DOA/HLA-DQB1/HLA-DQA1	7
MF	GO:0005216	ion channel activity	65/1461	499/17697	0.000156324	0.017226	0.0158304	ITPR1/GRIN2C/KCNK2/DPP6/KCNJ13/SLC26A7/KCNAB1/GRIK4/KCNK16/FGF12/TRPM3/TTYH2/CACNB4/CHRFAM7A/GABRB3/TRPC6/CLCNKB/CACNA2D2/CLCNKA/CHRNA7/TMCO1/KCNE3/GPM6A/ABCC8/RYR2/SGK1/GPD1L/KCNIP3/KCNK17/SLC24A3/KCNQ1/KCNK3/FAM155B/CLCC1/VDAC3/ANXA6/KCNIP4/TMEM150C/SLC26A9/TRPV6/UNC80/CACNA2D3/KCNN4/SCN1B/TMC6/KCNQ3/GABRB2/ANXA2/RYR1/FLNA/ANXA2P2/APOL1/PKP2/SCNN1A/TMC8/CLIC1/CATSPER1/HCN4/SNAP25/CACNG4/HPN/YWH…	65
MF	GO:0051015	actin filament binding	32/1461	198/17697	0.000181758	0.017226	0.0158304	SYNE1/PKNOX2/IQGAP2/CORO2B/NEB/NEXN/MYH3/DSTN/CLMN/ABLIM2/ANXA6/VPS16/TLN2/MYO10/MYH15/FLII/CTTN/FLNA/GSN/MYO1D/ARPC5L/ESPN/MYH14/SHROOM4/FMNL1/PSTPIP2/MAP1S/ARPC1B/ACTN1/LCP1/CORO1C/LASP1	32
MF	GO:0044325	ion channel binding	23/1461	124/17697	0.000186502	0.017226	0.0158304	KCNAB1/FHL1/FGF12/ANK2/ANK3/KCNE3/ABCC8/RYR2/GPD1L/HAP1/KCNIP3/KCNQ1/FKBP1A/SCN1B/STAC/LYN/FLNA/S100A10/PKP2/FYN/PACS2/ACTN1/YWHAH	23

## Sheet: Table S4
Supplementary Table 4. KEGG enrichment detailed results.
ID	Description	GeneRatio	BgRatio	pvalue	p.adjust	qvalue	Count
hsa05165	Human papillomavirus infection	43/699	331/8047	0.00459154	0.0547453	0.0472166	43
hsa04010	MAPK signaling pathway	40/699	294/8047	0.00272569	0.0402364	0.034703	40
hsa05166	Human T-cell leukemia virus 1 infection	39/699	219/8047	1.02823e-05	0.00045536	0.000392738	39
hsa04145	Phagosome	37/699	152/8047	4.60142e-09	1.42644e-06	1.23027e-06	37
hsa05169	Epstein-Barr virus infection	35/699	202/8047	5.27501e-05	0.00148659	0.00128216	35
hsa04514	Cell adhesion molecules	33/699	148/8047	2.97161e-07	2.303e-05	1.98629e-05	33
hsa04510	Focal adhesion	33/699	201/8047	0.000246827	0.00588587	0.00507644	33
hsa05152	Tuberculosis	31/699	180/8047	0.00015664	0.00404653	0.00349005	31
hsa05130	Pathogenic Escherichia coli infection	28/699	192/8047	0.00433137	0.053709	0.0463229	28
hsa04015	Rap1 signaling pathway	27/699	210/8047	0.0246779	0.173867	0.149957	27
hsa04530	Tight junction	24/699	161/8047	0.00602176	0.0622248	0.0536676	24
hsa04612	Antigen processing and presentation	23/699	78/8047	9.51248e-08	9.82956e-06	8.47779e-06	23
hsa04934	Cushing syndrome	22/699	155/8047	0.0144682	0.118469	0.102177	22
hsa04141	Protein processing in endoplasmic reticulum	22/699	167/8047	0.0314301	0.198843	0.171498	22
hsa04659	Th17 cell differentiation	21/699	107/8047	0.000292861	0.00605247	0.00522012	21
hsa05145	Toxoplasmosis	21/699	112/8047	0.000557991	0.0108111	0.00932432	21
hsa04390	Hippo signaling pathway	21/699	157/8047	0.0302256	0.195207	0.168362	21
hsa05416	Viral myocarditis	20/699	60/8047	6.82837e-08	9.82956e-06	8.47779e-06	20
hsa04918	Thyroid hormone synthesis	20/699	75/8047	3.73993e-06	0.000231876	0.000199988	20
hsa04640	Hematopoietic cell lineage	20/699	99/8047	0.000271475	0.00601123	0.00518456	20
hsa04380	Osteoclast differentiation	19/699	128/8047	0.014204	0.118469	0.102177	19
hsa00230	Purine metabolism	19/699	130/8047	0.0165744	0.128451	0.110787	19
hsa04931	Insulin resistance	18/699	108/8047	0.00515339	0.0570231	0.0491812	18
hsa05323	Rheumatoid arthritis	17/699	93/8047	0.00242011	0.0375118	0.0323531	17
hsa05150	Staphylococcus aureus infection	17/699	96/8047	0.00342148	0.0461156	0.0397738	17
hsa05140	Leishmaniasis	16/699	77/8047	0.000786632	0.0143445	0.0123718	16
hsa04512	ECM-receptor interaction	16/699	88/8047	0.00339174	0.0461156	0.0397738	16
hsa04658	Th1 and Th2 cell differentiation	16/699	92/8047	0.00533441	0.0570231	0.0491812	16
hsa04933	AGE-RAGE signaling pathway in diabetic complications	16/699	100/8047	0.011901	0.113754	0.0981102	16
hsa04670	Leukocyte transendothelial migration	16/699	113/8047	0.0343939	0.213242	0.183917	16
hsa05320	Autoimmune thyroid disease	15/699	53/8047	2.83446e-05	0.00109835	0.000947306	15
hsa04666	Fc gamma R-mediated phagocytosis	15/699	93/8047	0.0136152	0.118469	0.102177	15
hsa05330	Allograft rejection	13/699	38/8047	1.00276e-05	0.00045536	0.000392738	13
hsa05332	Graft-versus-host disease	13/699	42/8047	3.40808e-05	0.00117389	0.00101246	13
hsa04940	Type I diabetes mellitus	13/699	43/8047	4.50209e-05	0.00139565	0.00120372	13
hsa04978	Mineral absorption	13/699	59/8047	0.00135815	0.0221592	0.0191119	13
hsa05412	Arrhythmogenic right ventricular cardiomyopathy	13/699	77/8047	0.014522	0.118469	0.102177	13
hsa05217	Basal cell carcinoma	12/699	63/8047	0.00720542	0.0720542	0.0621452	12
hsa04971	Gastric acid secretion	12/699	76/8047	0.0298845	0.195207	0.168362	12
hsa04927	Cortisol synthesis and secretion	11/699	65/8047	0.0231242	0.166709	0.143783	11
hsa05321	Inflammatory bowel disease	11/699	65/8047	0.0231242	0.166709	0.143783	11
hsa05221	Acute myeloid leukemia	11/699	67/8047	0.0283816	0.191268	0.164964	11
hsa04923	Regulation of lipolysis in adipocytes	10/699	56/8047	0.0209596	0.158475	0.136681	10
hsa04930	Type II diabetes mellitus	9/699	46/8047	0.0158617	0.12608	0.108742	9
hsa04340	Hedgehog signaling pathway	9/699	50/8047	0.0264822	0.182433	0.157344	9
hsa05310	Asthma	8/699	31/8047	0.00404788	0.0522851	0.0450948	8
hsa04215	Apoptosis - multiple species	8/699	32/8047	0.00499518	0.0570231	0.0491812	8
hsa04960	Aldosterone-regulated sodium reabsorption	8/699	37/8047	0.0124716	0.113754	0.0981102	8
hsa00920	Sulfur metabolism	5/699	10/8047	0.000848383	0.014611	0.0126017	5
hsa00120	Primary bile acid biosynthesis	5/699	17/8047	0.0124762	0.113754	0.0981102	5

## Sheet: Table S5
Supplementary Table 5. GSEA enrichment detailed results.
NAME	GS<br> follow link to MSigDB	SIZE	ES	NES	NOM p-val	FDR q-val	FWER p-val	RANK AT MAX	LEADING EDGE
HALLMARK_ALLOGRAFT_REJECTION	HALLMARK_ALLOGRAFT_REJECTION	195	-0.572223	-1.68402	0.0385396	0.142697	0.215	5704	tags=73%, list=28%, signal=101%
HALLMARK_APICAL_JUNCTION	HALLMARK_APICAL_JUNCTION	194	-0.365107	-1.53049	0.0395062	0.15166	0.432	2937	tags=32%, list=14%, signal=37%
HALLMARK_APOPTOSIS	HALLMARK_APOPTOSIS	158	-0.391373	-1.5589	0.02746	0.173576	0.394	3615	tags=39%, list=18%, signal=46%
HALLMARK_COMPLEMENT	HALLMARK_COMPLEMENT	195	-0.40319	-1.47729	0.0696056	0.163745	0.508	4423	tags=46%, list=22%, signal=58%
HALLMARK_ESTROGEN_RESPONSE_LATE	HALLMARK_ESTROGEN_RESPONSE_LATE	195	-0.336665	-1.51939	0.0340909	0.143734	0.447	3670	tags=35%, list=18%, signal=43%
HALLMARK_IL2_STAT5_SIGNALING	HALLMARK_IL2_STAT5_SIGNALING	194	-0.38295	-1.46383	0.0543735	0.159151	0.53	5570	tags=53%, list=27%, signal=72%
HALLMARK_IL6_JAK_STAT3_SIGNALING	HALLMARK_IL6_JAK_STAT3_SIGNALING	87	-0.4628	-1.43058	0.135307	0.176	0.593	5410	tags=59%, list=26%, signal=79%
HALLMARK_INFLAMMATORY_RESPONSE	HALLMARK_INFLAMMATORY_RESPONSE	197	-0.472375	-1.54937	0.0852391	0.156884	0.4	5179	tags=60%, list=25%, signal=80%
HALLMARK_INTERFERON_ALPHA_RESPONSE	HALLMARK_INTERFERON_ALPHA_RESPONSE	92	-0.623763	-1.59803	0.0750988	0.19991	0.326	4356	tags=63%, list=21%, signal=80%
HALLMARK_INTERFERON_GAMMA_RESPONSE	HALLMARK_INTERFERON_GAMMA_RESPONSE	196	-0.594873	-1.58998	0.0580913	0.170104	0.342	5170	tags=69%, list=25%, signal=92%
HALLMARK_MYC_TARGETS_V1	HALLMARK_MYC_TARGETS_V1	188	-0.42809	-1.33902	0.199134	0.21393	0.721	4959	tags=52%, list=24%, signal=67%
HALLMARK_MYC_TARGETS_V2	HALLMARK_MYC_TARGETS_V2	58	-0.468596	-1.39466	0.136646	0.193255	0.645	3355	tags=43%, list=16%, signal=51%
HALLMARK_P53_PATHWAY	HALLMARK_P53_PATHWAY	191	-0.421606	-1.71992	0.00744417	0.162967	0.179	3618	tags=39%, list=18%, signal=47%
HALLMARK_TNFA_SIGNALING_VIA_NFKB	HALLMARK_TNFA_SIGNALING_VIA_NFKB	197	-0.436729	-1.35079	0.179872	0.217987	0.709	4674	tags=52%, list=23%, signal=67%
HALLMARK_ESTROGEN_RESPONSE_EARLY	HALLMARK_ESTROGEN_RESPONSE_EARLY	191	-0.298273	-1.28308	0.132075	0.255246	0.777	4300	tags=41%, list=21%, signal=52%
HALLMARK_EPITHELIAL_MESENCHYMAL_TRANSITION	HALLMARK_EPITHELIAL_MESENCHYMAL_TRANSITION	194	-0.372618	-1.25128	0.252137	0.274319	0.81	4613	tags=44%, list=22%, signal=56%
HALLMARK_COAGULATION	HALLMARK_COAGULATION	136	-0.411786	-1.72193	0.0102041	0.323602	0.177	3656	tags=38%, list=18%, signal=45%
HALLMARK_CHOLESTEROL_HOMEOSTASIS	HALLMARK_CHOLESTEROL_HOMEOSTASIS	72	-0.274138	-1.15013	0.252033	0.383287	0.898	2291	tags=22%, list=11%, signal=25%
HALLMARK_KRAS_SIGNALING_UP	HALLMARK_KRAS_SIGNALING_UP	193	-0.278466	-1.12246	0.291971	0.399075	0.916	5512	tags=48%, list=27%, signal=65%
HALLMARK_MYOGENESIS	HALLMARK_MYOGENESIS	198	-0.230723	-1.049	0.37561	0.440551	0.953	1556	tags=13%, list=8%, signal=14%
HALLMARK_UV_RESPONSE_UP	HALLMARK_UV_RESPONSE_UP	152	-0.234113	-1.0595	0.334225	0.44844	0.946	3385	tags=24%, list=16%, signal=29%
HALLMARK_REACTIVE_OXYGEN_SPECIES_PATHWAY	HALLMARK_REACTIVE_OXYGEN_SPECIES_PATHWAY	45	-0.316079	-1.0662	0.375536	0.461991	0.943	3827	tags=38%, list=19%, signal=46%
HALLMARK_PEROXISOME	HALLMARK_PEROXISOME	101	-0.243429	-1.01811	0.414248	0.462642	0.962	2579	tags=22%, list=13%, signal=25%
HALLMARK_E2F_TARGETS	HALLMARK_E2F_TARGETS	187	-0.27694	-0.88477	0.591919	0.640187	0.991	5134	tags=39%, list=25%, signal=51%
HALLMARK_DNA_REPAIR	HALLMARK_DNA_REPAIR	140	-0.221221	-0.811493	0.674673	0.700577	0.997	3655	tags=26%, list=18%, signal=31%
HALLMARK_NOTCH_SIGNALING	HALLMARK_NOTCH_SIGNALING	32	-0.234622	-0.820023	0.712871	0.71546	0.996	5135	tags=38%, list=25%, signal=50%
HALLMARK_APICAL_SURFACE	HALLMARK_APICAL_SURFACE	43	0.224869	0.771958	0.755814	0.812599	1	4635	tags=26%, list=23%, signal=33%
HALLMARK_PROTEIN_SECRETION	HALLMARK_PROTEIN_SECRETION	95	0.268985	0.786982	0.701724	0.831132	0.999	5713	tags=36%, list=28%, signal=49%
HALLMARK_MTORC1_SIGNALING	HALLMARK_MTORC1_SIGNALING	192	0.247376	0.811257	0.646953	0.83576	0.999	2011	tags=15%, list=10%, signal=16%
HALLMARK_WNT_BETA_CATENIN_SIGNALING	HALLMARK_WNT_BETA_CATENIN_SIGNALING	42	0.282752	0.905739	0.561837	0.870237	0.996	4011	tags=21%, list=20%, signal=27%
HALLMARK_ANGIOGENESIS	HALLMARK_ANGIOGENESIS	36	0.233412	0.700532	0.78169	0.874508	1	2192	tags=14%, list=11%, signal=16%
HALLMARK_TGF_BETA_SIGNALING	HALLMARK_TGF_BETA_SIGNALING	54	0.276807	0.813204	0.659176	0.88168	0.999	3614	tags=26%, list=18%, signal=31%
HALLMARK_HYPOXIA	HALLMARK_HYPOXIA	190	0.210267	0.836636	0.688995	0.889471	0.999	4713	tags=24%, list=23%, signal=31%
HALLMARK_MITOTIC_SPINDLE	HALLMARK_MITOTIC_SPINDLE	196	-0.193447	-0.637205	0.875274	0.894335	1	3991	tags=26%, list=19%, signal=31%
HALLMARK_GLYCOLYSIS	HALLMARK_GLYCOLYSIS	196	0.210274	0.857855	0.660287	0.906694	0.998	1734	tags=12%, list=8%, signal=13%
HALLMARK_KRAS_SIGNALING_DN	HALLMARK_KRAS_SIGNALING_DN	188	0.215959	0.916841	0.555249	0.91428	0.996	4689	tags=18%, list=23%, signal=23%
HALLMARK_OXIDATIVE_PHOSPHORYLATION	HALLMARK_OXIDATIVE_PHOSPHORYLATION	182	0.249209	0.613284	0.75502	0.936945	1	5411	tags=24%, list=26%, signal=33%
HALLMARK_ANDROGEN_RESPONSE	HALLMARK_ANDROGEN_RESPONSE	96	0.294232	0.935648	0.543103	0.944699	0.996	3288	tags=22%, list=16%, signal=26%
HALLMARK_G2M_CHECKPOINT	HALLMARK_G2M_CHECKPOINT	184	0.161866	0.48445	0.948515	0.974685	1	5536	tags=24%, list=27%, signal=32%
HALLMARK_BILE_ACID_METABOLISM	HALLMARK_BILE_ACID_METABOLISM	112	0.406499	1.54543	0.0308166	1	0.555	3818	tags=32%, list=19%, signal=39%
HALLMARK_PANCREAS_BETA_CELLS	HALLMARK_PANCREAS_BETA_CELLS	40	0.424971	1.41134	0.11617	1	0.743	2093	tags=23%, list=10%, signal=25%
HALLMARK_HEME_METABOLISM	HALLMARK_HEME_METABOLISM	190	0.312161	1.24177	0.178233	1	0.903	3770	tags=26%, list=18%, signal=31%
HALLMARK_UV_RESPONSE_DN	HALLMARK_UV_RESPONSE_DN	137	0.381126	1.21777	0.25089	1	0.917	4110	tags=32%, list=20%, signal=40%
HALLMARK_SPERMATOGENESIS	HALLMARK_SPERMATOGENESIS	132	0.285868	1.15936	0.256637	1	0.94	4401	tags=22%, list=21%, signal=28%
HALLMARK_UNFOLDED_PROTEIN_RESPONSE	HALLMARK_UNFOLDED_PROTEIN_RESPONSE	106	0.303687	1.0581	0.392157	1	0.982	2295	tags=18%, list=11%, signal=20%
HALLMARK_FATTY_ACID_METABOLISM	HALLMARK_FATTY_ACID_METABOLISM	154	0.315733	1.05583	0.404973	1	0.982	4402	tags=27%, list=21%, signal=34%
HALLMARK_ADIPOGENESIS	HALLMARK_ADIPOGENESIS	189	0.310982	1.05573	0.372943	1	0.982	4598	tags=29%, list=22%, signal=37%
HALLMARK_XENOBIOTIC_METABOLISM	HALLMARK_XENOBIOTIC_METABOLISM	197	0.248178	1.00098	0.425758	1	0.992	3841	tags=21%, list=19%, signal=25%
HALLMARK_PI3K_AKT_MTOR_SIGNALING	HALLMARK_PI3K_AKT_MTOR_SIGNALING	103	0.253645	0.950631	0.504202	1	0.996	4656	tags=27%, list=23%, signal=35%
HALLMARK_HEDGEHOG_SIGNALING	HALLMARK_HEDGEHOG_SIGNALING	35	0.318152	0.941245	0.538324	1	0.996	2053	tags=17%, list=10%, signal=19%
